# Supplementary material for: Enantioselective crossed intramolecular [2+2] photocycloaddition reactions mediated by a chiral chelating Lewis acid
Source: Royal Society of Chemistry journal article supplement (doi:10.1039/d2sc00113f), 2022-01-01
Supplement: d2sc00113f1.pdf [file d2sc00113f1.pdf]

Electronic Supplementary Information for

**Enantioselective crossed intramolecular [2+2]  
photocycloaddition reactions mediated by a chiral  
chelating Lewis acid**

*Thomas Rigotti,<sup>a</sup> Daniel P. Schwinger,<sup>a</sup> Raphaela Graßl,<sup>a</sup> Christian Jandl,<sup>a</sup> and  
Thorsten Bach<sup>\*a</sup>*

*<sup>a</sup>Department Chemie and Catalysis Research Center (CRC), Technische Universität  
München, Lichtenbergstr. 4, 85747 Garching, Germany*

Corresponding Author

\*email: [thorsten.bach@ch.tum.de](mailto:thorsten.bach@ch.tum.de)

## Table of contents:

|                                                                                              |     |
|----------------------------------------------------------------------------------------------|-----|
| 1. General Information                                                                       | S3  |
| 2. Setup for the Photochemical Reactions                                                     | S4  |
| 3. Emission and Characteristics of the 437, 424, 382 and 368 nm LEDs                         | S4  |
| 4. Experimental Procedures and Characterisation                                              | S9  |
| 5. Characterisation Data for the Enones ( <b>4d-f</b> and <b>4h-l</b> ) and their Precursors | S9  |
| 6. General Procedure for the Enantioselective [2+2] Photocycloaddition                       | S27 |
| 7. Characterisation Data for the Enantioenriched Cyclobutanes ( <b>5</b> )                   | S27 |
| 8. Characterisation Data for the Hydrazone ( <b>7</b> )                                      | S35 |
| 9. Characterisation Data for the Derivatized Cyclobutanes ( <b>10-15</b> )                   | S36 |
| 10. NMR Spectra                                                                              | S41 |
| 11. GC and HPLC Traces                                                                       | S77 |
| 12. Absolute Configuration Determination by X-Ray Analysis                                   | S88 |
| 13. Determination of Quantum Yield                                                           | S91 |
| 14. References                                                                               | S93 |

## 1. General Information

All reactions sensitive to air or moisture were carried out in flame-dried glassware under argon pressure using standard Schlenk techniques. Dry tetrahydrofuran (THF), diethyl ether (Et<sub>2</sub>O) and dichloromethane (CH<sub>2</sub>Cl<sub>2</sub>) were obtained from an MBraun MB-SPS 800 solvent purification system. Dry 1,2-dichloroethane (DCE) is commercially available (Merck or Acros Organics) and was employed without further purification. Technical solvents (pentane, diethyl ether, dichloromethane, methanol, hexanes, ethyl acetate, cyclohexane) were distilled prior employing them in column chromatography.

Flash column chromatography was performed on silica gel 60 (Merck, 230-400 mesh), on sfär silica D (Biotage®, 60 µm) or on basic alumina (Merck, aluminium oxide 90 active basic, 70-230 mesh) with the indicated eluent mixtures. Thin layer chromatography (TLC) was performed on silica coated glass plates (silica 60 F254) with detection by UV-light ( $\lambda = 254$  nm) and employing potassium permanganate (KMnO<sub>4</sub>) or cerium ammonium molybdate (CAM) stain developer solutions followed by heat treatment.

Nuclear Magnetic Resonance (NMR) spectra were recorded at room temperature either on a Bruker AVHD-300, AVHD-400, AVHD-500 or an AV-500 cryo. NMR spectra were calibrated to the respective residual solvent signals of CDCl<sub>3</sub> [ $\delta$  (<sup>1</sup>H) = 7.26 ppm,  $\delta$  (<sup>13</sup>C) = 77.16 ppm], CD<sub>2</sub>Cl<sub>2</sub> [ $\delta$  (<sup>1</sup>H) = 5.32 ppm,  $\delta$  (<sup>13</sup>C) = 53.84 ppm] or DMSO-D<sub>6</sub> [ $\delta$  (<sup>1</sup>H) = 2.50 ppm]. Coupling constants are given in Hz. The following abbreviations are used to indicate the multiplicity: s, singlet; d, doublet; t, triplet; q, quartet; p, pentet; m, multiplet; br, broad signal. Apparent multiplets which occur as a result of coupling constant equality between magnetically non-equivalent protons are marked as virtual (*virt.*).

Mass Spectroscopy (MS) and High-Resolution Mass Spectroscopy (HRMS) was performed on a Thermo Scientific LTQ-FT Ultra (ESI) or a Thermo Scientific DFS-HRMS spectrometer (EI).

UV/Vis Spectroscopy was performed on a Perkin Elmer Lambda 35 UV/Vis spectrometer. Spectra were recorded using a Hellma precision cell made of quartz SUPRASIL® with a pathway of 1.0 mm.

Infrared spectra (IR) were recorded on a JASCO IR-4100 or a Perkin Elmer Frontier IR-FTR spectrometer by ATR technique.

Chiral Gas Chromatography (GC) was performed on an Agilent 7890 B gas chromatograph using an Agilent CycloSil-B column (30 m x 0.25 mm x 0.25 µm, SN:

USF620714H) or a Macherey-Nagel Lipodex E column (25 m x 0.25 mm, SN: 23393-92) with a flame ionization detector. The temperature method is given for the corresponding compounds.

High Performance Liquid Chromatography (HPLC) analyses were performed using a chiral stationary phase [*Chiralcel* OJ-RH (150 x 4.6 mm), *Chiralpak* OD-RH (150 x 4.6 mm) or *Chiralpak* AS-H (250 x 4.6 mm), *Daicel Chemical Industries*] with UVD 340 Photodiode Array Detector, P580 Pump and an ASI-100 Automated Sample Injector at 20 °C, while a mixture of *n*-heptane/isopropanol (normal phase) or water/acetonitrile (reverse phase) was used as mobile phase. The exact conditions for the analyses are specified in each case.

Specific Rotation was determined using a Bellingham+Stanley ADP440+ polarimeter and is reported as follows:  $[\alpha]_D^T$  (c in g per 100 mL of solvent).

Melting points were determined using a Kofler (“Thermopan”, Fs Reichert, Wien) apparatus.

## 2. Setup for the Photochemical Reactions

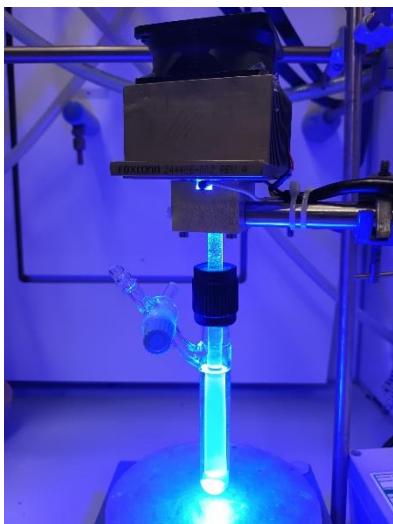

Photochemical experiments using a LED ( $\lambda = 437$  nm) operated at a constant current (700 mA) were carried out in a Schlenk tube (diameter = 1.0 cm) with a polished quartz rod as an optical fibre, which was roughened by sandblasting at one end. The roughened end has to be completely submerged in the solvent during the reaction, in order to guarantee optimal and reproducible irradiation conditions.<sup>1</sup>

**Figure S1:** Photoreactor setup.

## 3. Emission and Characteristics of the 437, 424, 382 and 368 nm LEDs

The characteristics of the specific LED employed for the photochemical reactions can be found in the following datasheet:

# Datasheet LED036

# Av-440-10W

## Basic Information

|                               |                          |
|-------------------------------|--------------------------|
| Type                          | High-Power-LED           |
| Description                   | Avonec 440-450 nm / 10 W |
| Manufacturer / Supplier       | n/a / Avonec             |
| Order number / Date of purch. | n/a / 01/2016            |
| Internal lot / serial number  | 2016-01 / LED036         |

## Specification Manufacturer

|                          |                                 |
|--------------------------|---------------------------------|
| Type / size              | 10 emitter / ca. 1 x 1 mm       |
| Mechanical specification | module, dye-area ca. 7.5 x 4 mm |
| Electrical specification | 700 mA, UF 16 V                 |
| Wavelength (range, typ.) | 440-450 nm, typ. n/a            |
| Spectral width (FWHM)    | n/a                             |
| Datasheet                | n/a                             |

## Characterization

|                              |                                                                                                                                                                                                                                                                                      |
|------------------------------|--------------------------------------------------------------------------------------------------------------------------------------------------------------------------------------------------------------------------------------------------------------------------------------|
| Description of measurement   | <p>Measured with Ocean-optics USB4000 spectrometer using a calibrated setup (cosine corrector/fibre).</p> <p>The distance between the emitting surface and the surface of the cosine corrector was 20 mm. The LED was operated at 700 mA on a passive heat-sink at approx. 20 °C</p> |
| Measured wavelength          | 437 nm                                                                                                                                                                                                                                                                               |
| Measured spectral width      | 18 nm                                                                                                                                                                                                                                                                                |
| Integral Reference intensity | 353000 $\mu\text{W}/\text{cm}^2$ (380-530 nm @ 20 mm distance, 4 mm cosine corr.)                                                                                                                                                                                                    |

## Spectrum

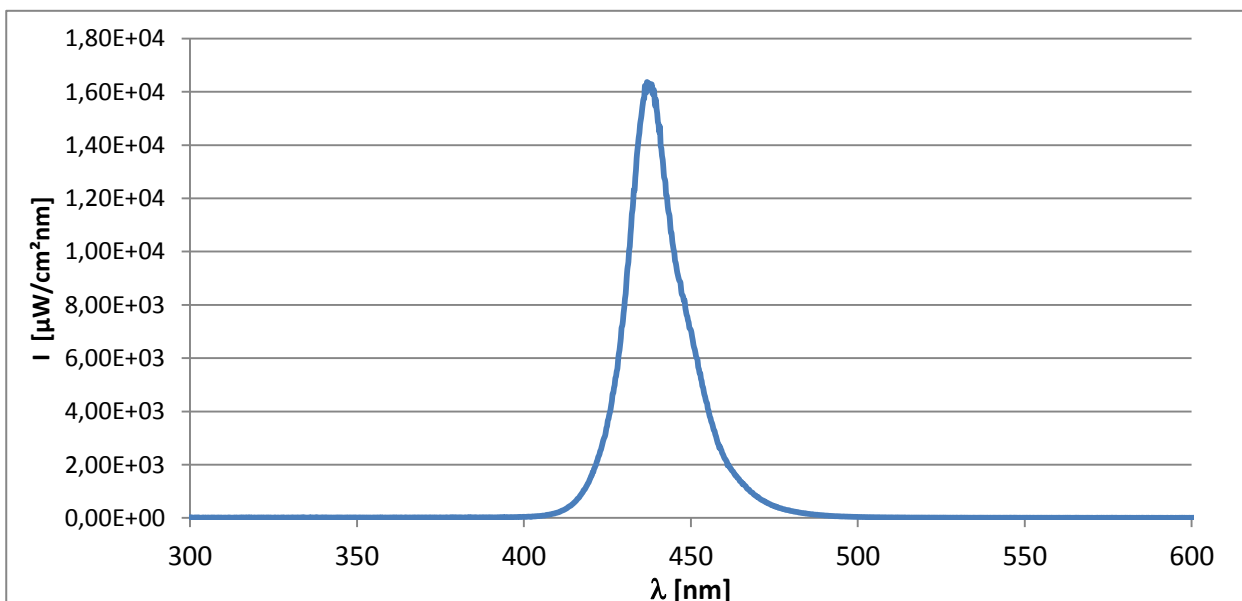

# Datasheet LED068

# LUXEON Z 420nm

## Basic Information

|                               |                                          |
|-------------------------------|------------------------------------------|
| Type                          | High-Power-LED                           |
| Description                   | Luxeon Z 420 nm on a Saber Z5 Base-Plate |
| Manufacturer / Supplier       | Philips Lumileds / Luxeonstar            |
| Order number / Date of purch. | n/a / 03/2018                            |
| Internal lot / serial number  | 2018-03 / LED065                         |

## Specification Manufacturer

|                          |                           |
|--------------------------|---------------------------|
| Type / size              | 4 emitters / ca. 1 x 1 mm |
| Mechanical specification |                           |
| Electrical specification | 700 mA, UF 12.2 V         |
| Wavelength (range, typ.) | 420-425 nm, typ. n/a      |
| Spectral width (FWHM)    | n/a                       |
| Datasheet                | LuxeonZUV.pdf             |

## Characterization

|                                      |                                                                                                                                                                                                                                                                           |                                          |
|--------------------------------------|---------------------------------------------------------------------------------------------------------------------------------------------------------------------------------------------------------------------------------------------------------------------------|------------------------------------------|
| Description of measurement           | Measured with Ocean-optics USB4000 spectrometer using a calibrated setup (cosine corrector/fibre).<br>The distance between the emitting surface and the surface of the cosine corrector was 20 mm. The LED was operated at 700 mA on a passive heat-sink at approx. 20 °C |                                          |
| Measured dominant wavelength / Int.  | 424 nm                                                                                                                                                                                                                                                                    | 13558 $\mu\text{W}/\text{mm}^2\text{nm}$ |
| Measured spectral width (FWHM)       | 14 nm                                                                                                                                                                                                                                                                     |                                          |
| Integral Reference intensity / range | 236390 $\mu\text{W}/\text{cm}^2$                                                                                                                                                                                                                                          | 350-500 nm                               |

## Spectrum

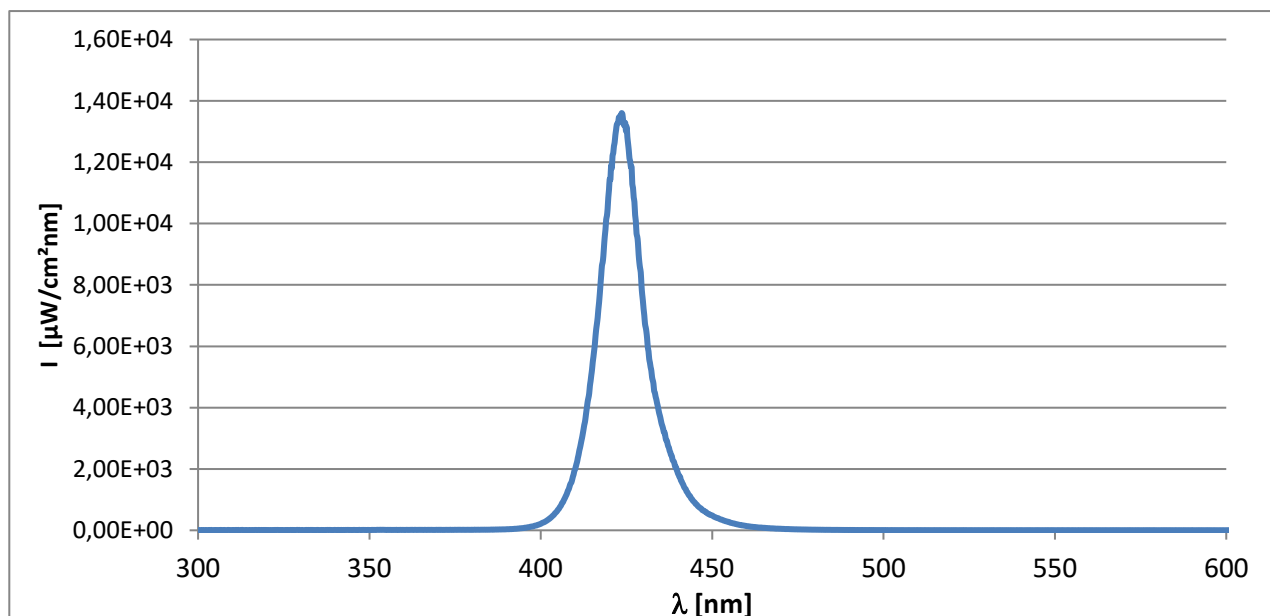

# Datasheet LED033

# Av-380-3W

## Basic Information

|                               |                         |
|-------------------------------|-------------------------|
| Type                          | High-Power-LED          |
| Description                   | Avonec 370-380 nm / 3 W |
| Manufacturer / Supplier       | n/a / Avonec            |
| Order number / Date of purch. | n/a / 07/2016           |
| Internal lot / serial number  | 2016-07 / LED033        |

## Specification Manufacturer

|                          |                               |
|--------------------------|-------------------------------|
| Type / size              | single emitter / ca. 1 x 1 mm |
| Mechanical specification |                               |
| Electrical specification | 700 mA, UF 3.8 V              |
| Wavelength (range, typ.) | 380-390 nm, typ. n/a          |
| Spectral width (FWHM)    | n/a                           |
| Datasheet                | n/a                           |

## Characterization

|                              |                                                                                                                                                                                                                                                                                      |
|------------------------------|--------------------------------------------------------------------------------------------------------------------------------------------------------------------------------------------------------------------------------------------------------------------------------------|
| Description of measurement   | <p>Measured with Ocean-optics USB4000 spectrometer using a calibrated setup (cosine corrector/fibre).</p> <p>The distance between the emitting surface and the surface of the cosine corrector was 20 mm. The LED was operated at 700 mA on a passive heat-sink at approx. 20 °C</p> |
| Measured wavelength          | 382 nm                                                                                                                                                                                                                                                                               |
| Measured spectral width      | 13 nm                                                                                                                                                                                                                                                                                |
| Integral Reference intensity | 11360 $\mu\text{W}/\text{cm}^2$ (350-425 nm @ 20 mm distance, 4 mm cosine corr.)                                                                                                                                                                                                     |

## Spectrum

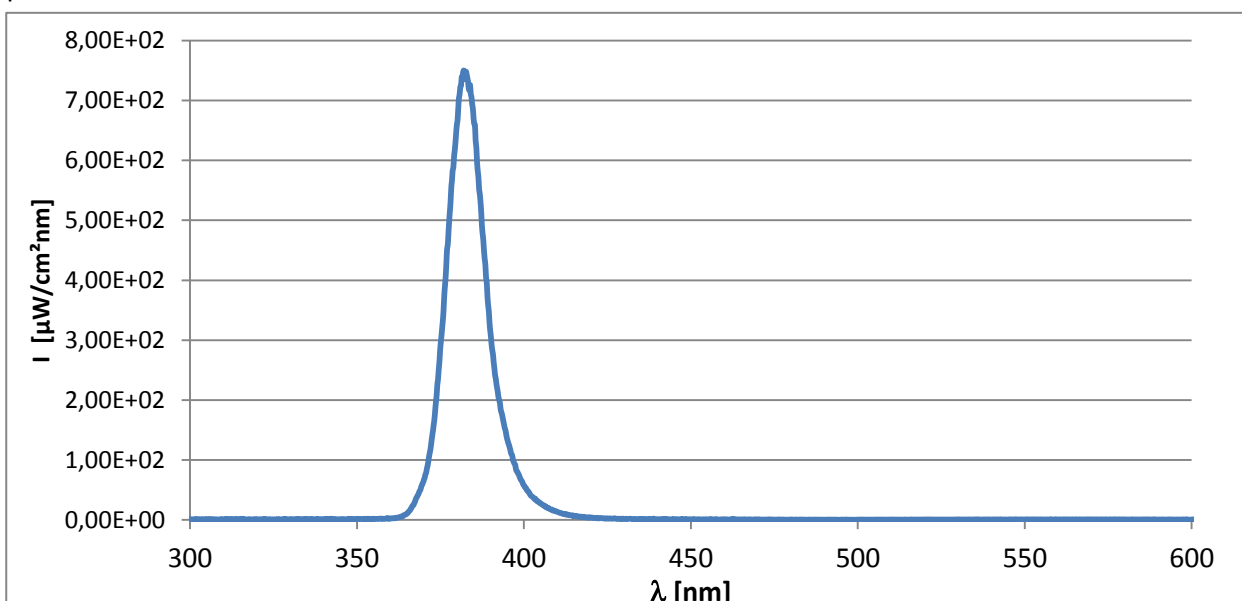

# Datasheet LED040

366 / 10W

## Basic Information

Ultra-High-Power UV-A-LED

Type

High-Power-LED

Description

Manufacturer / Supplier

Mouser

Order number / Date of purch.

LZ4-44UV00-0000 / 06/2016

Internal lot / serial number

2016-01 / LED040

## Specification Manufacturer

Type / size

quattro emitter / not spec.

Mechanical specification

Electrical specification

700 mA @18V

Wavelength (range, typ.)

Spectral width (FWHM)

Datasheet

LZ4-04UV-series

## Characterization

Description of measurement

Measured with Ocean-optics USB4000 spectrometer using a calibrated setup (cosine corrector/fibre).

The distance between the emitting surface and the surface of the cosine corrector was 20 mm. The LED was operated at 500 mA on a passive heat-sink at approx. 20 °C

Measured wavelength

368 nm

Measured spectral width

12 nm

Integral Reference intensity

18605  $\mu\text{W}/\text{cm}^2$  (350-425 nm @ 20 mm distance, 4 mm cosine corr.)

Spectrum

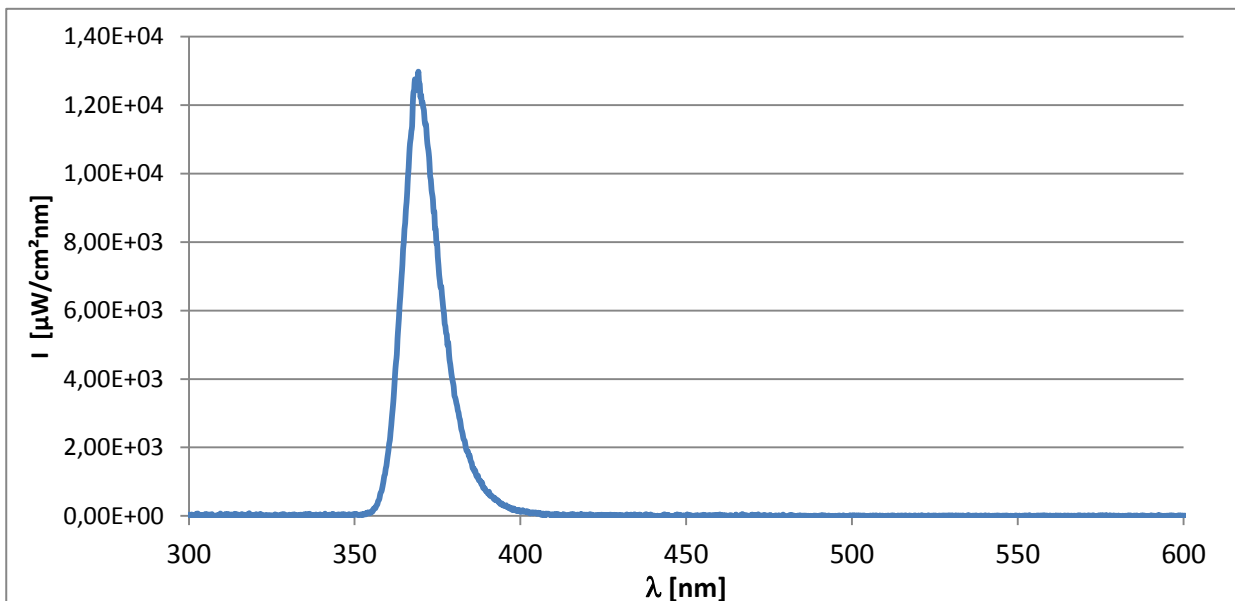



#### 4. Experimental Procedures and Characterisation

Enones **4a**, **4b**, **4c**, **4g** and **4m** were obtained following our previously reported procedures.<sup>2</sup> The enantiopure  $\Lambda$ -catalyst **6** employed in the photoreactions was obtained following the procedure reported by Meggers and coworkers.<sup>3</sup> In all the cases the analytical data of the synthesized compounds and catalyst were in accordance with the data reported in the literature.<sup>2,3</sup>

#### 5. Characterisation Data for the Enones (4d-f and 4h-l) and their Precursors

##### (Z)-4-(Benzyloxy)but-2-en-1-ol (**S1**)

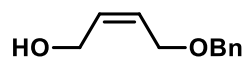

A stirred suspension of NaH (880 mg, 22.0 mmol, 60% mineral oil) in dry THF (60 mL) was cooled to 0 °C. Then, *cis*-2-buten-1,4-diol (5.29 g, 60.0 mmol) was dropwise added and the resulting mixture stirred for 30 min at 0 °C, followed by the addition of benzyl bromide (3.42 g, 20.0 mmol). The reaction mixture was let warm to rt and stirred for further 14 hours. Then, a saturated solution of NH<sub>4</sub>Cl was added and extracted with EtOAc. The organic phase was washed with brine and dried over Na<sub>2</sub>SO<sub>4</sub>. After evaporation of the solvents at reduced pressure the residue was purified by flash chromatography on silica gel (from 20 to 33% EtOAc in hexanes) to obtain 3.27 g of product **S1** as a yellowish oil (92% yield).

$R_f$  = 0.29 (33% EtOAc in hexanes).

The NMR data were in accordance with the data reported in the literature.<sup>4</sup>

<sup>1</sup>H NMR (500 MHz, CDCl<sub>3</sub>):  $\delta$  7.38 – 7.32 (m, 4H), 7.32 – 7.28 (m, 1H), 5.86 – 5.80 (m, 1H), 5.78 – 5.71 (m, 1H), 4.53 (s, 2H), 4.20 – 4.16 (m, 2H), 4.12 – 4.08 (m, 2H), 1.68 (br s, 1H).

##### (Z)-{[(4-Bromobut-2-en-1-yl)oxy]methyl}benzene (**S2**)

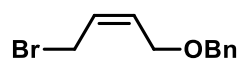

PBr<sub>3</sub> (0.63 mL, 6.6 mmol) was dropwise added to a stirred solution of **S1** (2.95 g, 16.5 mmol) in dry Et<sub>2</sub>O (33 mL) at 0 °C. The reaction mixture was let warm to rt and stirred for 12 hours, before being quenched by the addition of a saturated solution of NaHCO<sub>3</sub>. After extraction with Et<sub>2</sub>O, the organic phase was washed with brine and dried over Na<sub>2</sub>SO<sub>4</sub>. After evaporation of the solvents at reduced pressure the residue was purified by flash chromatography on silica gel (2% EtOAc in hexanes) to obtain 3.78 g of product **S2** as a yellowish oil (95% yield).

$R_f = 0.12$  (2% EtOAc in hexanes).

The NMR data were in accordance with the data reported in the literature.<sup>4</sup>

<sup>1</sup>H NMR (300 MHz, CDCl<sub>3</sub>):  $\delta$  7.40 – 7.27 (m, 5H), 5.96 – 5.85 (m, 1H), 5.81 – 5.71 (m, 1H), 4.54 (s, 2H), 4.16 (dd,  $J = 6.3, 1.5$  Hz, 2H), 3.99 (d,  $J = 8.1$  Hz, 2H).

**(Z)-2-[[4-(Benzyloxy)but-2-en-1-yl]oxy]cyclohex-2-en-1-one (4d)**

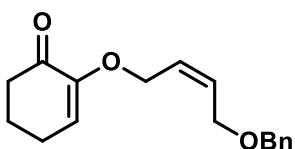

**S2** (1.45 g, 6.00 mmol) was dropwise added to a stirred suspension of 1,2-cyclohexanedione (561 mg, 5.00 mmol) and anhydrous K<sub>2</sub>CO<sub>3</sub> (830 mg, 6.00 mmol) in dry DMF (20 mL).

The reaction mixture was stirred at rt until full conversion was achieved, as judged by TLC analysis (36 hours). Then the mixture was diluted with Et<sub>2</sub>O and brine was added. After separation of the organic phase, the latter was washed three times with brine and dried over Na<sub>2</sub>SO<sub>4</sub>. After evaporation of the solvents at reduced pressure the residue was purified by flash chromatography on silica gel (20% EtOAc in hexanes) to obtain 300 mg of product **4d** as a pale-yellow oil (22% yield).

$R_f = 0.16$  (20% EtOAc in hexanes).

**IR:**  $\tilde{\nu}$  [cm<sup>-1</sup>] = 2928, 1726, 1454, 1275, 1099, 1073, 749, 700.

<sup>1</sup>H NMR (500 MHz, CDCl<sub>3</sub>):  $\delta$  7.38 – 7.26 (m, 5H), 5.84 (t,  $J = 4.6$  Hz, 1H), 5.83 – 5.77 (m, 2H), 4.52 (s, 2H), 4.40 – 4.34 (m, 2H), 4.13 – 4.07 (m, 2H), 2.53 – 2.48 (m, 2H), 2.40 (td,  $J = 6.0, 4.6$  Hz, 2H), 1.99 – 1.93 (m, 2H).

<sup>13</sup>C NMR (126 MHz, CDCl<sub>3</sub>):  $\delta$  194.5, 150.3, 138.1, 129.6, 128.6 (2C), 128.3, 128.0 (2C), 127.9, 118.5, 72.5, 66.0, 63.9, 39.0, 24.6, 23.0.

**HRMS (ESI):** calculated for C<sub>17</sub>H<sub>20</sub>NaO<sub>3</sub><sup>+</sup>, [M+Na]<sup>+</sup> = 295.1305; found = 295.1304.

**(Z)-4-methoxybut-2-en-1-ol (S3)**

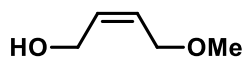

A stirred suspension of NaH (1.00 g, 25.0 mmol, 60% mineral oil) in dry THF (20 mL) was cooled to 0 °C. Then, *cis*-2-buten-1,4-diol (6.61 g, 75.0 mmol) was dropwise added and the resulting mixture stirred for 30 min at 0 °C, followed by the addition of 1.56 mL of methyl iodide (25.0 mmol). The reaction mixture was let warm to rt and stirred for further 16 hours. Then, a saturated solution of NH<sub>4</sub>Cl was added and extracted with EtOAc. The organic phase was washed with brine and dried over Na<sub>2</sub>SO<sub>4</sub>. After evaporation of the solvents at reduced pressure the residue was purified by flash chromatography on silica gel (from 50% to 66% of EtOAc in *n*-pentane) to obtain 1.12 g of product **S3** as a colourless oil (44% yield).

$R_f = 0.29$  (50% EtOAc in *n*-pentane).

The NMR data were in accordance with the data reported in the literature.<sup>5</sup>

$^1\text{H NMR}$  (300 MHz,  $\text{CDCl}_3$ ):  $\delta$  5.87 – 5.75 (m, 1H), 5.74 – 5.62 (m, 1H), 4.20 (d,  $J = 6.0$  Hz, 2H), 3.99 (d,  $J = 6.0$  Hz, 2H), 3.34 (s, 3H).

#### (*Z*)-1-Bromo-4-methoxybut-2-ene (**S4**)

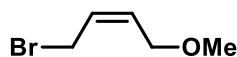

$\text{PBr}_3$  (0.42 mL, 4.4 mmol) was dropwise added to a stirred solution of **S3** (1.12 g, 11.0 mmol) in dry  $\text{Et}_2\text{O}$  (22 mL) at 0 °C. The reaction mixture was let warm to rt and stirred for 16 hours, before being quenched by the addition of a saturated solution of  $\text{NaHCO}_3$ . After extraction with  $\text{Et}_2\text{O}$ , the organic phase was washed with brine and dried over  $\text{Na}_2\text{SO}_4$ . After evaporation of the solvents at reduced pressure the residue was purified by flash chromatography on silica gel (3%  $\text{Et}_2\text{O}$  in *n*-pentane) to obtain 1.11 g of product **S4** as a colourless oil (61% yield).

$R_f = 0.28$  (3% EtOAc in hexanes).

The NMR data were in accordance with the data reported in the literature.<sup>5</sup>

$^1\text{H NMR}$  (300 MHz,  $\text{CDCl}_3$ ):  $\delta$  5.96 – 5.83 (m, 1H), 5.76 – 5.65 (m, 1H), 4.06 (dd,  $J = 6.3, 1.6$  Hz, 2H), 4.01 (dd,  $J = 8.3, 0.7$  Hz, 2H), 3.36 (s, 3H).

#### (*Z*)-2-[(4-methoxybut-2-en-1-yl)oxy]cyclohex-2-en-1-one (**4e**)

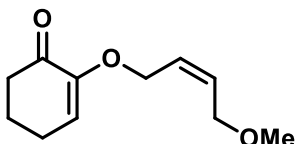

**S4** (990 mg, 6.00 mmol) was dropwise added to a stirred suspension of 1,2-cyclohexanedione (561 mg, 5.00 mmol) and anhydrous  $\text{K}_2\text{CO}_3$  (830 mg, 6.00 mmol) in dry DMF (20 mL). The reaction mixture was stirred at rt until full conversion was achieved, as judged by TLC analysis (40 hours). Then the mixture was diluted with  $\text{Et}_2\text{O}$  and brine was added. After separation of the organic phase, the latter was washed three times with brine and dried over  $\text{Na}_2\text{SO}_4$ . After evaporation of the solvents at reduced pressure the residue was purified by flash chromatography on silica gel (20% EtOAc in hexanes) to obtain 231 mg of product **4e** as a colourless oil (24% yield).

$R_f = 0.24$  (33% EtOAc in hexanes).

**IR:**  $\tilde{\nu}$  [ $\text{cm}^{-1}$ ] = 2929, 1733, 1267, 1101, 737, 702.

$^1\text{H NMR}$  (500 MHz,  $\text{CDCl}_3$ ):  $\delta$  5.90 (t,  $J = 4.6$  Hz, 1H), 5.83 – 5.69 (m, 2H), 4.40 (dd,  $J = 5.5, 1.4$  Hz, 2H), 4.01 (dd,  $J = 5.8, 1.1$  Hz, 2H), 3.34 (s, 3H), 2.53 – 2.49 (m, 2H), 2.42 (td,  $J = 6.0, 4.6$  Hz, 2H), 2.01 – 1.94 (m, 2H).

$^{13}\text{C}$  NMR (101 MHz,  $\text{CDCl}_3$ ):  $\delta$  194.3, 150.3, 129.6, 127.9, 118.6, 68.4, 63.8, 58.2, 38.9, 24.5, 22.9.

**HRMS (ESI)**: calculated for  $\text{C}_{11}\text{H}_{16}\text{NaO}_3^+$ ,  $[\text{M}+\text{Na}]^+ = 219.0992$ ; found = 219.0993.

**(Z)-1-Bromo-4-[[4-(4-bromobut-2-en-1-yl)oxy]methyl]benzene (S5)**

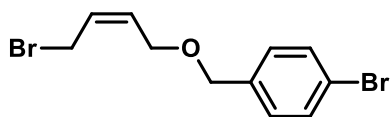

A stirred suspension of NaH (880 mg, 22.0 mmol, 60% mineral oil) in dry THF (60 mL) was cooled to 0 °C. Then, *cis*-2-buten-1,4-diol (5.29 g, 60.0 mmol) was dropwise added and the resulting mixture stirred for 30 min at 0 °C, followed by the addition of 4-bromobenzyl bromide (5.00 g, 20.0 mmol). The reaction mixture was let warm to rt and stirred for further 24 hours. Then, a saturated solution of  $\text{NH}_4\text{Cl}$  was added and extracted with EtOAc. The organic phase was washed with brine and dried over  $\text{Na}_2\text{SO}_4$ . After evaporation of the solvents at reduced pressure the residue was dissolved in 40 mL of dry  $\text{Et}_2\text{O}$  and cooled to 0 °C, followed by dropwise addition of  $\text{PBr}_3$  (8.00 mmol). The reaction mixture was let warm to rt and stirred for further 24 hours. Thus, a saturated solution of  $\text{NH}_4\text{Cl}$  was added and extracted with  $\text{Et}_2\text{O}$ . The organic phase was washed with brine and dried over  $\text{Na}_2\text{SO}_4$ . After evaporation of the solvents at reduced pressure the residue was purified by flash chromatography on silica gel (2% EtOAc in hexanes) to obtain 4.90 g of product **S5** as a colourless oil (77% yield).

$R_f = 0.24$  (2% EtOAc in hexanes).

**IR**:  $\tilde{\nu}$  [ $\text{cm}^{-1}$ ] = 2877, 1496, 1455, 1099.

$^1\text{H}$  NMR (300 MHz,  $\text{CDCl}_3$ ):  $\delta$  7.52 – 7.44 (m, 2H), 7.25 – 7.20 (m, 2H), 5.91 (dtt,  $J = 11.0, 8.2, 1.5$  Hz, 1H), 5.74 (dtt,  $J = 11.0, 6.3, 0.8$  Hz, 1H), 4.48 (s, 2H), 4.15 (dd,  $J = 6.3, 1.5$  Hz, 2H), 3.98 (dd,  $J = 8.2, 0.8$  Hz, 2H).

$^{13}\text{C}$  NMR (75 MHz,  $\text{CDCl}_3$ ):  $\delta$  136.9, 131.2 (2C), 130.7, 129.0 (2C), 128.2, 121.2, 71.2, 64.9, 26.5.

**HRMS (ESI)**: calculated for  $\text{C}_{11}\text{H}_{12}\text{Br}_2\text{NaO}^+$ ,  $[\text{M}+\text{Na}]^+ = 340.9147$ ; found = 340.9151.

**(Z)-2-[[4-(Benzyloxy)but-2-en-1-yl]oxy]cyclohex-2-en-1-one (4f)**

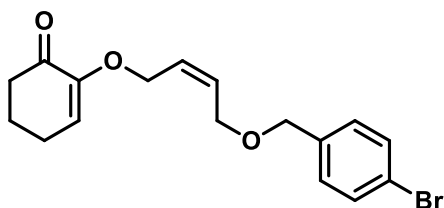

**S5** (1.92 g, 6.00 mmol) was dropwise added to a stirred suspension of 1,2-cyclohexanedione (561 mg, 5.00 mmol) and anhydrous  $\text{K}_2\text{CO}_3$  (830 mg, 6.00 mmol) in dry DMF (20 mL). The reaction mixture was stirred at rt until full conversion was achieved, as judged by TLC

analysis (36 hours). Then the mixture was diluted with Et<sub>2</sub>O and brine was added. After separation of the organic phase, the latter was washed three times with brine and dried over Na<sub>2</sub>SO<sub>4</sub>. After evaporation of the solvents at reduced pressure the residue was purified by flash chromatography on silica gel (from 33% to 50% EtOAc in hexanes) to obtain 106 mg of product **4f** as a colourless oil (6% yield).

**R<sub>f</sub>** = 0.10 (33% EtOAc in hexanes).

**IR:**  $\tilde{\nu}$  [cm<sup>-1</sup>] = 2930, 1734, 1488, 1262, 1070, 1011, 804.

**<sup>1</sup>H NMR** (500 MHz, CDCl<sub>3</sub>):  $\delta$  7.49 – 7.44 (m, 2H), 7.23 – 7.18 (m, 2H), 5.85 – 5.75 (m, 3H), 4.46 (s, 2H), 4.35 – 4.32 (m, 2H), 4.10 – 4.08 (m, 2H), 2.52 – 2.49 (m, 2H), 2.40 (td, *J* = 6.1, 4.6 Hz, 2H), 2.00 – 1.93 (m, 2H).

**<sup>13</sup>C NMR** (75 MHz, CDCl<sub>3</sub>):  $\delta$  194.2, 150.2, 137.1, 131.5 (2C), 129.4 (2C), 129.3, 128.1, 121.5, 118.5, 71.5, 65.9, 63.7, 38.8, 24.5, 22.9.

**HRMS (ESI):** calculated for C<sub>17</sub>H<sub>19</sub>BrNaO<sub>3</sub><sup>+</sup>, [M+Na]<sup>+</sup> = 373.0410; found = 373.0411.

#### Ethyl 2-cyclobutylideneacetate (**S6**)

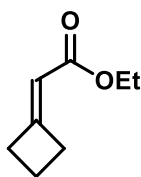

A stirred suspension of NaH (1.82 g, 45.4 mmol, 60% mineral oil) in dry THF (30 mL) was cooled to 0 °C. Then 9.0 mL of triethyl phosphonoacetate (45 mmol) were dropwise added and the resulting mixture stirred for 30 min at 0 °C. Subsequently a THF solution (5 mL) of cyclobutanone (2.65 g, 37.8 mmol) was added at 0 °C. The reaction mixture was let warm to rt and stirred for further 18 hours. Water was added and the aqueous phase was extracted with EtOAc. The combined organic phases were washed with brine and dried over Na<sub>2</sub>SO<sub>4</sub>. After evaporation of the solvents at reduced pressure the residue was purified by flash chromatography on silica gel (from 0 to 6% EtOAc in hexanes) to obtain 2.61 g of product **S6** as a colourless oil (49% yield).

**R<sub>f</sub>** = 0.31 (4% EtOAc in hexanes).

The NMR data were in accordance with the data reported in the literature.<sup>6</sup>

**<sup>1</sup>H NMR** (300 MHz, CDCl<sub>3</sub>):  $\delta$  5.58 (*virt. p*, *J* = 2.3 Hz, 1H), 4.14 (q, *J* = 7.1 Hz, 2H), 3.19 – 3.07 (m, 2H), 2.89 – 2.78 (m, 2H), 2.09 (*virt. p*, *J* = 8.0 Hz, 2H), 1.26 (t, *J* = 7.1 Hz, 3H).

### Spiro[3.5]nonane-6,8-dione (**S7**)

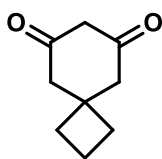

Diethyl 1,3-acetonedicarboxylate (4.51 g, 22.3 mmol) was dropwise added to a suspension of NaH (1.79 g, 44.7 mmol, 60% mineral oil) in dry THF (18 mL) at 0 °C. After stirring at this temperature for 20 min the  $\alpha,\beta$ -unsaturated ester **S6** (2.61 g, 18.6 mmol) was dropwise added. The reaction mixture was stirred for 30 min at rt, then stirred at reflux for 20 min. Subsequently, a suspension of sodium ethoxide (3.81 g, 56.0 mmol) in 24 mL of ethanol was added and the corresponding reaction mixture was stirred at reflux for 5 hours. Then a solution of KOH (20.9 g, 373 mmol) in 83 mL of water was added and stirred at reflux for further 4 hours. After cooling to rt the organic solvents were removed at reduced pressure and the aqueous phase was washed with diethyl ether before being acidified to acid pH with concentrated HCl. After 4 hours of stirring at 80 °C the mixture was allowed to cool to rt and extracted twice with DCM. The combined organic phases were washed with brine and dried over Na<sub>2</sub>SO<sub>4</sub>. After evaporation of the solvents at reduced pressure the residue was suspended in 10 mL of MTBE and allowed to stir for 20 min before being filtered over a Büchner funnel to obtain 1.01 g of product **S7** as a white solid (36% yield).

The NMR data (for the keto-enol tautomer) were in accordance with the literature.<sup>6</sup>

<sup>1</sup>H NMR (400 MHz, DMSO):  $\delta$  11.01 (br s, 1H), 5.16 (s, 1H), 2.36 (s, 4H), 1.90 – 1.80 (m, 2H), 1.80 – 1.72 (m, 4H).

### 8-Ethoxyspiro[3.5]non-7-en-6-one (**S8**)

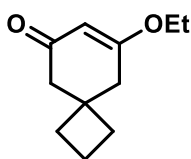

The 1,3-diketone **S7** (1.00 g, 6.58 mmol) was stirred for 2 hours at reflux conditions in a Dean-Stark apparatus in the presence of *p*-TsOH (31.3 mg, 0.165 mmol), 3 mL of ethanol and 20 mL of toluene. After cooling to rt the solvents were removed at reduced pressure and the residue was purified by flash chromatography on silica gel (20% EtOAc in hexanes) to obtain 1.16 g of **S8** as a colourless oil (98% yield).

$R_f$  = 0.24 (20% EtOAc in hexanes).

IR:  $\tilde{\nu}$  [cm<sup>-1</sup>] = 2934, 1651, 1601, 1377, 1357, 1214, 734.

<sup>1</sup>H NMR (300 MHz, CDCl<sub>3</sub>):  $\delta$  5.31 (s, 1H), 3.89 (q,  $J$  = 7.0 Hz, 2H), 2.49 (s, 2H), 2.44 (s, 2H), 1.97 – 1.78 (m, 6H), 1.36 (t,  $J$  = 7.0 Hz, 3H).

<sup>13</sup>C NMR (75 MHz, CDCl<sub>3</sub>):  $\delta$  197.1, 174.6, 101.5, 63.3, 48.3, 40.8, 37.7, 30.9 (2C), 14.1, 13.2.

HRMS (ESI): calculated for C<sub>11</sub>H<sub>17</sub>O<sub>2</sub><sup>+</sup>, [M+H]<sup>+</sup> = 181.1223; found = 181.1220.

### Spiro[3.5]non-7-en-6-one (**S9**)

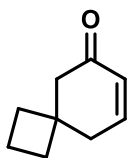

A solution of enone **S8** (1.16 g, 6.43 mmol) in 10 mL of dry Et<sub>2</sub>O was dropwise added to a suspension of LiAlH<sub>4</sub> (122 mg, 3.21 mmol) in 20 mL of dry Et<sub>2</sub>O at 0 °C. After stirring for 13 hours at rt the reaction mixture was quenched with water and stirred for 1 hour at rt in the presence of 20 mL of a 10% aq. solution of sulfuric acid. After extraction with diethyl ether, the combined organic phases were washed with brine and dried over Na<sub>2</sub>SO<sub>4</sub>. Thus, after evaporation of the solvents at reduced pressure, the residue was purified by flash chromatography on silica gel (10% EtOAc in hexanes) to obtain 754 mg of **S9** as a colourless oil (86% yield).

**R<sub>f</sub>** = 0.26 (10% EtOAc in hexanes).

**IR:**  $\tilde{\nu}$  [cm<sup>-1</sup>] = 2920, 2859, 1672, 1441, 1359, 1227.

**<sup>1</sup>H NMR** (500 MHz, CDCl<sub>3</sub>):  $\delta$  6.87 (dt, *J* = 10.0, 4.1 Hz, 1H), 6.00 (dt, *J* = 10.0, 2.0 Hz, 1H), 2.52 (s, 2H), 2.46 (dd, *J* = 4.1, 2.0 Hz, 2H), 1.96 – 1.80 (m, 6H).

**<sup>13</sup>C NMR** (75 MHz, CDCl<sub>3</sub>):  $\delta$  198.5, 147.6, 129.3, 49.6, 39.6, 38.1, 31.6 (2C), 14.5.

**HRMS (ESI):** calculated for C<sub>9</sub>H<sub>13</sub>O<sup>+</sup>, [M+H]<sup>+</sup> = 137.0961; found = 137.0956.

### 7-(Allyloxy)spiro[3.5]non-7-en-6-one (**4h**)

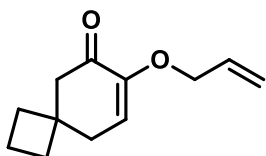

To a methanol solution (12 mL) of enone **S9** (754 mg, 5.54 mmol) 2.0 mL of H<sub>2</sub>O<sub>2</sub> (30%) were dropwise added at 0 °C, followed by 0.2 mL of 1 M NaOH solution. After stirring for 5 hours at 0 °C, the reaction mixture was extracted twice with CH<sub>2</sub>Cl<sub>2</sub> and the combined organic phases were washed with brine and dried over Na<sub>2</sub>SO<sub>4</sub>. After evaporation of the solvents at reduced pressure the residue was dropwise added (as an allylic alcohol solution – 10 equiv. of allyl alcohol) to a cooled suspension of NaH (266 mg, 6.64 mmol, 60% mineral oil) in allyl alcohol (20 equiv.) at 0 °C. After 34 hours stirring at rt the reaction mixture was diluted with diethyl ether and water. After extraction of the aqueous phase with diethyl ether, the combined organic phases were washed with brine and dried over Na<sub>2</sub>SO<sub>4</sub>. After evaporation of the solvents at reduced pressure the residue was purified by flash chromatography on silica gel (10% EtOAc in hexanes) to obtain 382 mg of **4h** as a colourless oil which solidified as a white solid upon standing (36% yield).

**R<sub>f</sub>** = 0.25 (10% EtOAc in hexanes).

**mp** = 50-55 °C

**IR:**  $\tilde{\nu}$  [cm<sup>-1</sup>] = 2929, 1690, 1624, 1164, 1083, 989, 924.

**<sup>1</sup>H NMR** (500 MHz, CDCl<sub>3</sub>): δ 5.97 (ddt, *J* = 17.3, 10.6, 5.5 Hz, 1H), 5.74 (t, *J* = 4.6 Hz, 1H), 5.32 (*virt.* dq, *J* = 17.3, 1.5 Hz, 1H), 5.24 (*virt.* dq, *J* = 10.6, 1.5 Hz, 1H), 4.30 (*virt.* dt, *J* = 5.5, 1.5 Hz, 2H), 2.60 (s, 2H), 2.51 (d, *J* = 4.6 Hz, 2H), 1.97 – 1.77 (m, 6H).

**<sup>13</sup>C NMR** (75 MHz, CDCl<sub>3</sub>): δ 194.0, 150.5, 132.8, 117.9, 115.8, 68.7, 50.6, 40.1, 37.2, 31.9 (2C), 15.2.

**HRMS (ESI)**: calculated for C<sub>12</sub>H<sub>17</sub>O<sub>2</sub><sup>+</sup>, [M+H]<sup>+</sup> = 193.1223; found = 193.1217.

### 1-Cyclohexylidenepropan-2-one (S10)

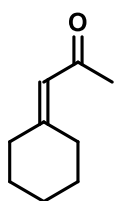

A stirred solution of KOH (2.02 g, 36.0 mmol) in a 4:1 mixture of ethanol:water (72 mL) was cooled to 0 °C. Then 5.98 g (36.0 mmol) of dimethylacetylmethylphosphonate were dropwise added at the same temperature, followed by the addition of cyclohexanone (2.36 g, 24.0 mmol) at rt. The resulting reaction mixture was stirred for 36 hours. Then water and diethyl ether were added and the aqueous phase was extracted with diethyl ether. The combined organic phases were washed with brine and the solvents removed at reduced pressure. The residue was taken up in diethyl ether, washed with brine once again and dried over Na<sub>2</sub>SO<sub>4</sub>. After evaporation of the solvents at reduced pressure the residue was purified by flash chromatography on silica gel (from 0 to 4% EtOAc in hexanes) to obtain 2.28 g of product **S10** as a pale pink oil (69% yield).

*R<sub>f</sub>* = 0.33 (4% EtOAc in hexanes).

The NMR data were in accordance with the data reported in the literature.<sup>7</sup>

**<sup>1</sup>H NMR** (500 MHz, CDCl<sub>3</sub>): δ 5.98 (s, 1H), 2.80 – 2.75 (m, 2H), 2.20 – 2.11 (m, 5H), 1.71 – 1.55 (m, 6H).

### Spiro[5.5]undecane-2,4-dione (S11)

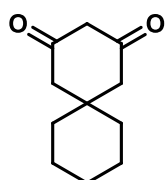

Sodium metal (547 mg, 23.8 mmol) was added to 30 mL of dry ethanol. The suspension was stirred until the sodium completely dissolved and, once back to rt, diethyl malonate (1.90 g, 11.9 mmol) was added to the resulting colourless solution, followed by the addition of enone **S10** (1.64 g, 11.9 mmol) in 6.0 mL of dry ethanol. The reaction mixture was stirred at reflux for 24 hours and then cooled to rt. Subsequently, a solution of KOH (6.67 g, 119 mmol) in 24 mL of water was added and stirred at reflux for further 36 hours. After cooling to rt the organic solvents were removed at reduced pressure and the aqueous phase was washed with diethyl ether before being acidified to acid pH with concentrated HCl. Thus, EtOAc



was added and the aqueous phase was extracted with EtOAc. The combined organic phases were washed with brine and dried over Na<sub>2</sub>SO<sub>4</sub>. In the end, after evaporation of the solvents at reduced pressure, the resulting residue was purified by flash chromatography on silica gel (50% EtOAc in hexanes) to obtain 1.59 g of product **S11** as a pale yellow solid (74% yield).

$R_f = 0.17$  (50% EtOAc in hexanes).

The NMR data were in accordance with the data reported in the literature.<sup>8</sup>

<sup>1</sup>H NMR (500 MHz, CDCl<sub>3</sub>):  $\delta$  3.34 (s, 2H), 2.59 (s, 4H), 1.54 – 1.30 (m, 10H).

#### 4-Ethoxyspiro[5.5]undec-3-en-2-one (**S12**)

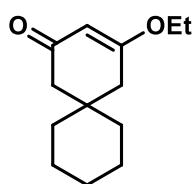

The 1,3-diketone **S11** (1.94 g, 10.75 mmol) was stirred for 14 hours at reflux conditions in a Dean-Stark apparatus in the presence of *p*-TsOH (51.0 mg, 0.268 mmol), 4.0 mL of ethanol and 20 mL of toluene. After cooling to rt the solvents were removed at reduced pressure and the

residue was purified by flash chromatography on silica gel (20% EtOAc in hexanes) to obtain 2.00 g of **S12** as a yellowish oil (89% yield).

$R_f = 0.37$  (20% EtOAc in hexanes).

**IR:**  $\tilde{\nu}$  [cm<sup>-1</sup>] = 2927, 1655, 1607, 1377, 1210.

<sup>1</sup>H NMR (300 MHz, CDCl<sub>3</sub>):  $\delta$  5.32 (s, 1H), 3.89 (q,  $J = 7.0$  Hz, 2H), 2.33 (s, 2H), 2.28 (s, 2H), 1.52 – 1.40 (m, 10H), 1.36 (t,  $J = 7.0$  Hz, 3H).

<sup>13</sup>C NMR (75 MHz, CDCl<sub>3</sub>):  $\delta$  198.4, 175.2, 100.9, 63.7, 48.1, 40.1, 36.0 (2C), 34.7, 25.7, 21.2 (2C), 13.7.

**HRMS (ESI):** calculated for C<sub>13</sub>H<sub>21</sub>O<sub>2</sub><sup>+</sup>, [M+H]<sup>+</sup> = 209.1536; found = 209.1532.

#### Spiro[5.5]undec-3-en-2-one (**S13**)

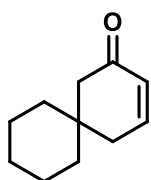

A solution of enone **S12** (2.00 g, 9.62 mmol) in 8.0 mL of dry Et<sub>2</sub>O was dropwise added to a suspension of LiAlH<sub>4</sub> (183 mg, 4.82 mmol) in 30 mL of dry Et<sub>2</sub>O at 0 °C. After stirring for 14 hours at rt the reaction mixture was quenched with water and stirred for 1 hour at rt in the presence of 50 mL of

a 10% aq. solution of sulfuric acid. After extraction with diethyl ether, the combined organic phases were washed with brine and dried over Na<sub>2</sub>SO<sub>4</sub>. Thus, after evaporation of the solvents at reduced pressure, the residue was purified by flash chromatography on silica gel (10% EtOAc in hexanes) to obtain 678 mg of **S13** as a colourless oil (43% yield).

$R_f = 0.21$  (10% EtOAc in hexanes).

**IR:**  $\tilde{\nu}$  [ $\text{cm}^{-1}$ ] = 2925, 2857, 1678, 1452, 1388, 1247.

**$^1\text{H}$  NMR** (300 MHz,  $\text{CDCl}_3$ ):  $\delta$  6.84 (dt,  $J = 10.1, 4.2$  Hz, 1H), 6.00 (dt,  $J = 10.1, 2.1$  Hz, 1H), 2.35 (s, 2H), 2.30 (dd,  $J = 4.2, 2.1$  Hz, 2H), 1.62 – 1.35 (m, 10H).

**$^{13}\text{C}$  NMR** (75 MHz,  $\text{CDCl}_3$ ):  $\delta$  199.5, 147.8, 128.8, 49.4, 37.3, 36.4, 36.3 (2C), 26.0, 21.3 (2C).

**HRMS (ESI):** calculated for  $\text{C}_{11}\text{H}_{17}\text{O}^+$ ,  $[\text{M}+\text{H}]^+ = 165.1274$ ; found = 165.1270.

### 3-(Allyloxy)spiro[5.5]undec-3-en-2-one (**4i**)

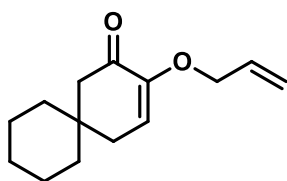

To a methanol solution (8 mL) of enone **S13** (678 mg, 4.13 mmol) 1.5 mL of  $\text{H}_2\text{O}_2$  (30%) were dropwise added at 0 °C, followed by 0.15 mL of 1 M NaOH solution. After stirring for 5 hours at 0 °C, the reaction mixture was extracted twice with

DCM and the combined organic phases were washed with brine and dried over  $\text{Na}_2\text{SO}_4$ . After evaporation of the solvents at reduced pressure the residue was dropwise added (as an allylic alcohol solution – 10 equiv. of allyl alcohol) to a cooled suspension of NaH (242 mg, 6.05 mmol, 60% mineral oil) in allyl alcohol (20 equiv.) at 0 °C. After 36 hours stirring at rt the reaction mixture was diluted with diethyl ether and water. After extraction of the aqueous phase with diethyl ether, the combined organic phases were washed with brine and dried over  $\text{Na}_2\text{SO}_4$ . After evaporation of the solvents at reduced pressure the residue was purified by flash chromatography on silica gel (8% EtOAc in hexanes) to obtain 352 mg of **4i** as a colourless oil (39% yield).

$R_f = 0.26$  (10% EtOAc in hexanes).

**IR:**  $\tilde{\nu}$  [ $\text{cm}^{-1}$ ] = 2926, 2856, 1731, 1453, 1173, 1121, 735.

**$^1\text{H}$  NMR** (500 MHz,  $\text{CDCl}_3$ ):  $\delta$  5.98 (ddt,  $J = 17.3, 10.6, 5.5$  Hz, 1H), 5.71 (t,  $J = 4.7$  Hz, 1H), 5.32 (*virt.* dq,  $J = 17.3, 1.5$  Hz, 1H), 5.24 (*virt.* dq,  $J = 10.6, 1.5$  Hz, 1H), 4.31 (*virt.* dt,  $J = 5.5, 1.5$  Hz, 2H), 2.44 (s, 2H), 2.34 (d,  $J = 4.7$  Hz, 2H), 1.48 – 1.39 (m, 10H).

**$^{13}\text{C}$  NMR** (75 MHz,  $\text{CDCl}_3$ ):  $\delta$  194.4, 149.9, 133.1, 118.1, 115.6, 68.8, 50.1, 36.8, 36.4 (2C), 36.1, 26.4, 21.7 (2C).

**HRMS (ESI):** calculated for  $\text{C}_{14}\text{H}_{21}\text{O}_2^+$ ,  $[\text{M}+\text{H}]^+ = 221.1536$ ; found = 221.1533.

### Ethyl 3-propylhex-2-enoate (S14)

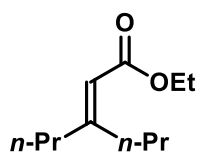

A stirred suspension of NaH (1.60 g, 40.0 mmol, 60% mineral oil) in dry THF (40 mL) was cooled to 0 °C. Then 7.94 mL of triethyl phosphonoacetate (40.0 mmol) were dropwise added and the resulting mixture stirred for 30 min at 0 °C. Subsequently a THF solution (20 mL) of 4-heptanone (2.28 g, 20.0 mmol) was added at 0 °C. The reaction mixture was let warm to rt and stirred at reflux for 14 hours. After cooling to rt, water was added and the aqueous phase was extracted with EtOAc. The combined organic phases were washed with brine and dried over Na<sub>2</sub>SO<sub>4</sub>. After evaporation of the solvents at reduced pressure the residue was purified by flash chromatography on silica gel (from 1 to 4% EtOAc in hexanes) to obtain 3.69 g of product **S14** as a colourless oil (100% yield).

$R_f = 0.36$  (2% EtOAc in hexanes).

The NMR data were in accordance with the data reported in the literature.<sup>9</sup>

<sup>1</sup>H NMR (300 MHz, CDCl<sub>3</sub>): δ 5.62 (s, 1H), 4.13 (q,  $J = 7.1$  Hz, 2H), 2.65 – 2.51 (m, 2H), 2.15 – 2.06 (m, 2H), 1.56 – 1.39 (m, 4H), 1.27 (t,  $J = 7.1$  Hz, 3H), 0.99 – 0.88 (m, 6H).

### 4-Propylhept-3-en-2-one (S15)

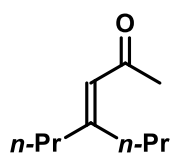

40.0 mL of a 2 M solution of *i*-PrMgCl (4 equiv.) in THF were dropwise added to a stirred solution of ester **S14** (3.69 g, 20.0 mmol) and *N,O*-dimethylhydroxylamine hydrochloride (3.90 g, 40.0 mmol) in 40 mL of dry THF at -10 °C. The resulting reaction mixture was let warm to rt and stirred for 4 hours before being quenched with a saturated solution of NH<sub>4</sub>Cl and extracted with EtOAc. The combined organic phases were washed with brine and dried over Na<sub>2</sub>SO<sub>4</sub>. The obtained residue was dissolved in 40 mL of dry THF and 7.95 mL of a 3 M solution of MeMgBr (1.2 equiv.) in diethyl ether were dropwise added at 0 °C. The resulting mixture was let warm until rt and stirred overnight before being quenched with a saturated solution of NH<sub>4</sub>Cl and extracted with EtOAc. The combined organic phases were washed with brine and dried over Na<sub>2</sub>SO<sub>4</sub>. After evaporation of the solvents at reduced pressure the residue was purified by flash chromatography on silica gel (5% EtOAc in hexanes) to obtain 2.21 g of product **S15** as a colourless oil (72% yield).

$R_f = 0.56$  (10% EtOAc in hexanes).

IR:  $\tilde{\nu}$  [cm<sup>-1</sup>] = 2936, 1710, 1481, 1355, 1099.

**<sup>1</sup>H NMR** (500 MHz, CDCl<sub>3</sub>): δ 6.02 (s, 1H), 2.54 – 2.49 (m, 2H), 2.16 (s, 3H), 2.12 – 2.06 (m, 2H), 1.54 – 1.39 (m, 4H), 0.96 – 0.90 (m, 6H).

**<sup>13</sup>C NMR** (75 MHz, CDCl<sub>3</sub>): δ 196.8, 161.8, 122.7, 40.2, 33.6, 31.0, 21.4, 20.4, 13.7, 13.2.

**HRMS (ESI)**: calculated for C<sub>10</sub>H<sub>19</sub>O<sup>+</sup>, [M+H]<sup>+</sup> = 155.1430; found = 155.1426.

### 5,5-Dipropylcyclohexane-1,3-dione (**S16**)

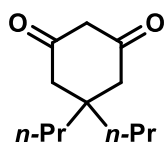

Sodium metal (659 mg, 28.7 mmol) was added to 38 mL of dry ethanol. The suspension was stirred until the sodium completely dissolved and, once back to rt, diethyl malonate (4.59 g, 28.7 mmol) was added to the resulting colourless solution, followed by the addition of enone **S15** (2.21 g, 14.3 mmol) in 5.0 mL of dry ethanol. The reaction mixture was stirred at reflux for 24 hours and then cooled to rt. Subsequently, a solution of KOH (8.04 g, 143 mmol) in 29 mL of water was added and stirred at reflux for further 36 hours. After cooling to rt the organic solvents were removed at reduced pressure and the aqueous phase was washed with diethyl ether before being acidified to acid pH with concentrated HCl. Thus, EtOAc was added and the aqueous phase was extracted with EtOAc. The combined organic phases were washed with brine and dried over Na<sub>2</sub>SO<sub>4</sub>. In the end, after evaporation of the solvents at reduced pressure, the resulting residue was purified by flash chromatography on silica gel (50% EtOAc in hexanes) to obtain 2.05 g of product **S16** as a pale yellow solid (73% yield).

**R<sub>f</sub>** = 0.30 (50% EtOAc in hexanes).

**IR**:  $\tilde{\nu}$  [cm<sup>-1</sup>] = 2958, 1570, 1406, 1223, 1143, 751.

**<sup>1</sup>H NMR** (500 MHz, CDCl<sub>3</sub>): δ 3.32 (s, 2H), 2.51 (s, 4H), 1.26 – 1.13 (m, 8H), 0.86 (t, J = 6.6 Hz, 6H).

**<sup>13</sup>C NMR** (75 MHz, CDCl<sub>3</sub>): δ 204.2 (2C), 57.8, 51.1 (2C), 40.2 (2C), 36.5, 16.6 (2C), 14.6 (2C).

A 2:1 mixture of tautomers was observed in CDCl<sub>3</sub> (the reported NMR signals are the data of the major 1,3-diketone tautomer).

**HRMS (ESI)**: calculated for C<sub>12</sub>H<sub>21</sub>O<sub>2</sub><sup>+</sup>, [M+H]<sup>+</sup> = 197.1536; found = 197.1533.

### 5,5-Dipropylcyclohex-2-en-1-one (S17)

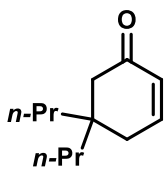

The 1,3-diketone **S16** (2.04 g, 10.4 mmol) was stirred for 14 hours at reflux conditions in a Dean-Stark apparatus in the presence of *p*-TsOH (50.0 mg, 0.263 mmol), 4.0 mL of ethanol and 30 mL of toluene. After cooling to rt the solvents were removed at reduced pressure and a solution of the residue in 12 mL of dry Et<sub>2</sub>O was dropwise added to a suspension of LiAlH<sub>4</sub> (197 mg, 5.19 mmol) in 30 mL of dry Et<sub>2</sub>O at 0 °C. After stirring for 16 hours at rt the reaction mixture was quenched with a saturated solution of NH<sub>4</sub>Cl and stirred for 2 hours at rt in the presence of 50 mL of a 10% aq. solution of sulfuric acid. After extraction with diethyl ether, the combined organic phases were washed with brine and dried over Na<sub>2</sub>SO<sub>4</sub>. Thus, after evaporation of the solvents at reduced pressure, the residue was purified by flash chromatography on silica gel (3% EtOAc in hexanes) to obtain 1.55 g of **S17** as a colourless oil (83% yield).

$R_f$  = 0.34 (4% EtOAc in *n*-pentane).

**IR:**  $\tilde{\nu}$  [cm<sup>-1</sup>] = 2923, 2844, 1676, 1471, 1390, 1239.

**<sup>1</sup>H NMR** (400 MHz, CDCl<sub>3</sub>):  $\delta$  6.87 – 6.79 (m, 1H), 6.03 – 5.96 (m, 1H), 2.29 (s, 2H), 2.26 – 2.20 (m, 2H), 1.36 – 1.13 (m, 8H), 0.91 – 0.83 (m, 6H).

**<sup>13</sup>C NMR** (101 MHz, CDCl<sub>3</sub>):  $\delta$  200.4, 148.4, 129.3, 48.9, 40.0 (2C), 39.4, 36.7, 16.8 (2C), 14.9 (2C).

**HRMS (ESI):** calculated for C<sub>12</sub>H<sub>21</sub>O<sup>+</sup>, [M+H]<sup>+</sup> = 181.1587; found = 181.1585.

### 2-(Allyloxy)-5,5-dipropylcyclohex-2-en-1-one (4j)

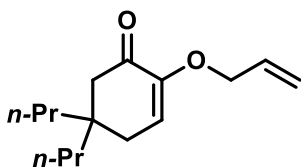

To a methanol solution (9 mL) of enone **S17** (1.55 g, 8.57 mmol) 3.0 mL of H<sub>2</sub>O<sub>2</sub> (30%) were dropwise added at 0 °C, followed by 0.30 mL of 1 M NaOH solution. After stirring for 7 hours at 0 °C, the reaction mixture was extracted twice with EtOAc and the combined organic phases were washed with brine and dried over Na<sub>2</sub>SO<sub>4</sub>. After evaporation of the solvents at reduced pressure the residue was dropwise added (as an allylic alcohol solution – 10 equiv. of allyl alcohol) to a cooled suspension of NaH (514 mg, 22.4 mmol, 60% mineral oil) in allyl alcohol (20 equiv.) at 0 °C. After 36 hours stirring at rt the reaction mixture was diluted with diethyl ether and water. After extraction of the aqueous phase with diethyl ether, the combined organic phases were washed with brine and dried over Na<sub>2</sub>SO<sub>4</sub>. After evaporation of the solvents at reduced pressure the

residue was purified by flash chromatography on silica gel (5% EtOAc in *n*-pentane) to obtain 406 mg of **4j** as a pale-yellow oil (20% yield).

$R_f = 0.24$  (5% EtOAc in cyclohexane).

**IR:**  $\tilde{\nu}$  [ $\text{cm}^{-1}$ ] = 2958, 2930, 1688, 1630, 1167, 734.

**$^1\text{H}$  NMR** (300 MHz,  $\text{CDCl}_3$ ):  $\delta$  5.97 (ddt,  $J = 17.3, 10.6, 5.5$  Hz, 1H), 5.69 (t,  $J = 4.7$  Hz, 1H), 5.31 (*virt.* dq,  $J = 17.3, 1.5$  Hz, 1H), 5.23 (*virt.* dq,  $J = 10.6, 1.5$  Hz, 1H), 4.30 (*virt.* dt,  $J = 5.5, 1.5$  Hz, 2H), 2.37 (s, 2H), 2.27 (d,  $J = 4.7$  Hz, 2H), 1.38 – 1.11 (m, 8H), 0.85 (t,  $J = 6.9$  Hz, 6H).

**$^{13}\text{C}$  NMR** (75 MHz,  $\text{CDCl}_3$ ):  $\delta$  194.6, 149.9, 133.0, 118.0, 115.8, 68.8, 49.4, 39.6 (2C), 39.4, 35.1, 16.8 (2C), 14.8 (2C).

**HRMS (ESI):** calculated for  $\text{C}_{15}\text{H}_{24}\text{NaO}_2^+$ ,  $[\text{M}+\text{Na}]^+ = 259.1669$ ; found = 259.1668.

### Ethyl 3,3-dicyclopropylacrylate (**S18**)

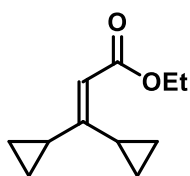

A stirred suspension of NaH (1.60 g, 40.0 mmol, 60% mineral oil) in dry THF (40 mL) was cooled to 0 °C. Then 7.94 mL of triethyl phosphonoacetate (40.0 mmol) were dropwise added and the resulting mixture stirred for 30 min at 0 °C. Subsequently a THF solution (20 mL)

of dicyclopropylketone (2.20 g, 20.0 mmol) was added at 0 °C. The reaction mixture was let warm to rt and stirred at reflux for 36 hours. After cooling to rt, water was added and the aqueous phase was extracted with EtOAc. The combined organic phases were washed with brine and dried over  $\text{Na}_2\text{SO}_4$ . After evaporation of the solvents at reduced pressure the residue was purified by flash chromatography on silica gel (from 1 to 4% EtOAc in hexanes) to obtain 1.99 g of product **S18** as a pale-yellow oil (55% yield).

$R_f = 0.33$  (2% EtOAc in hexanes).

**IR:**  $\tilde{\nu}$  [ $\text{cm}^{-1}$ ] = 2981, 1709, 1620, 1248, 1193, 1151, 1039, 926.

**$^1\text{H}$  NMR** (300 MHz,  $\text{CDCl}_3$ ):  $\delta$  5.40 (s, 1H), 4.14 (q,  $J = 7.1$  Hz, 2H), 3.29 (tt,  $J = 8.4, 5.3$  Hz, 1H), 1.27 (t,  $J = 7.1$  Hz, 3H), 1.00 – 0.83 (m, 5H), 0.76 – 0.68 (m, 2H), 0.58 – 0.49 (m, 2H).

**$^{13}\text{C}$  NMR** (75 MHz,  $\text{CDCl}_3$ ):  $\delta$  167.8, 166.1, 111.2, 59.5, 14.5, 14.3, 11.8, 7.8 (2C), 7.4 (2C).

**HRMS (ESI):** calculated for  $\text{C}_{11}\text{H}_{17}\text{O}_2^+$ ,  $[\text{M}+\text{H}]^+ = 181.1223$ ; found = 181.1222.

#### 4,4-Dicyclopropylbut-3-en-2-one (S19)

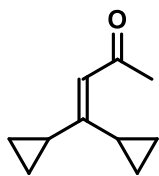

22.0 mL of a 2 M solution of *i*-PrMgCl (4 equiv.) in THF were dropwise added to a stirred solution of ester **S18** (1.98 g, 11.0 mmol) and *N,O*-dimethylhydroxylamine hydrochloride (2.15 g, 22.0 mmol) in 33 mL of dry THF at -10 °C. The resulting reaction mixture was stirred for 1 hour until 5 °C, then 3 hours at rt, before being quenched with a saturated solution of NH<sub>4</sub>Cl and extracted with EtOAc. The combined organic phases were washed with brine and dried over Na<sub>2</sub>SO<sub>4</sub>. The obtained residue was dissolved in 22 mL of dry THF and 4.4 mL of a 3 M solution of MeMgBr (1.2 equiv.) in diethyl ether were dropwise added at 0 °C. The resulting mixture was let warm to rt and stirred overnight before being quenched with a saturated solution of NH<sub>4</sub>Cl and extracted with EtOAc. The combined organic phases were washed with brine and dried over Na<sub>2</sub>SO<sub>4</sub>. After evaporation of the solvents at reduced pressure the residue was purified by flash chromatography on silica gel (10% EtOAc in hexanes) to obtain 1.40 g of product **S19** as a colourless oil (85% yield).

$R_f = 0.37$  (10% EtOAc in hexanes).

**IR:**  $\tilde{\nu}$  [cm<sup>-1</sup>] = 2925, 2855, 1726, 1461, 1378, 1108.

**<sup>1</sup>H NMR** (400 MHz, CDCl<sub>3</sub>):  $\delta$  5.77 (s, 1H), 3.42 – 3.30 (m, 1H), 2.17 (s, 3H), 1.00 – 0.84 (m, 5H), 0.78 – 0.71 (m, 2H), 0.58 – 0.50 (m, 2H).

**<sup>13</sup>C NMR** (101 MHz, CDCl<sub>3</sub>):  $\delta$  199.1, 165.7, 118.8, 32.3, 14.6, 11.7, 8.2 (2C), 7.9 (2C).

**HRMS (ESI):** calculated for C<sub>10</sub>H<sub>15</sub>O<sup>+</sup>, [M+H]<sup>+</sup> = 151.1117; found = 151.1111.

#### 5,5-Dicyclopropylcyclohexane-1,3-dione (S20)

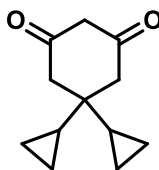

Sodium metal (429 mg, 18.7 mmol) was added to 24 mL of dry ethanol. The suspension was stirred until the sodium completely dissolved and, once back to rt, diethyl malonate (2.99 g, 18.7 mmol) was added to the resulting colourless solution, followed by the addition of enone **S19** (1.40 g, 9.34 mmol) in 4.0 mL of dry ethanol. The reaction mixture was stirred at reflux for 24 hours and then cooled to rt. Subsequently, a solution of KOH (5.24 g, 93.4 mmol) in 19 mL of water was added and stirred at reflux for further 36 hours. After cooling to rt the organic solvents were removed at reduced pressure and the aqueous phase was washed with diethyl ether before being acidified to acid pH with concentrated HCl. Thus, EtOAc was added and the aqueous phase was extracted with EtOAc. The combined organic phases were washed with brine and dried over Na<sub>2</sub>SO<sub>4</sub>. In the end, after evaporation of the solvents at reduced pressure, the resulting residue was purified by flash

chromatography on silica gel (50% EtOAc in hexanes) to obtain 1.52 g of product **S20** as a pale yellow solid (85% yield).

$R_f = 0.26$  (50% EtOAc in hexanes).

The NMR data were in accordance with the data reported in the literature.<sup>10</sup>

$^1\text{H NMR}$  (300 MHz,  $\text{CDCl}_3$ ):  $\delta$  3.35 (s, 2H), 2.41 (s, 4H), 0.70 – 0.56 (m, 2H), 0.45 – 0.27 (m, 8H).

### 5,5-Dicyclopropylcyclohex-2-en-1-one (**S21**)

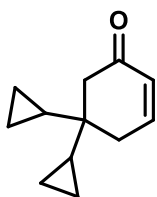

The 1,3-diketone **S20** (1.52 g, 7.92 mmol) was stirred for 14 hours at reflux conditions in a Dean-Stark apparatus in the presence of *p*-TsOH (38.0 mg, 0.200 mmol), 3.0 mL of ethanol and 20 mL of toluene. After cooling to rt the solvents were removed at reduced pressure and a solution of the residue in 12 mL of dry  $\text{Et}_2\text{O}$  was dropwise added to a suspension of  $\text{LiAlH}_4$  (152 mg, 4.00 mmol) in 20 mL of dry  $\text{Et}_2\text{O}$  at 0 °C. After stirring for 16 hours at rt the reaction mixture was quenched with a saturated solution of  $\text{NH}_4\text{Cl}$  and stirred for 2 hours at rt in the presence of 50 mL of a 10% aq. solution of sulfuric acid. After extraction with diethyl ether, the combined organic phases were washed with brine and dried over  $\text{Na}_2\text{SO}_4$ . Thus, after evaporation of the solvents at reduced pressure, the residue was purified by flash chromatography on silica gel (4% EtOAc in *n*-pentane) to obtain 977 mg of **S21** as a colourless oil (70% yield).

$R_f = 0.19$  (4% EtOAc in *n*-pentane).

**IR:**  $\tilde{\nu}$  [ $\text{cm}^{-1}$ ] = 3007, 1677, 1389, 1251, 1019, 733.

$^1\text{H NMR}$  (400 MHz,  $\text{CDCl}_3$ ):  $\delta$  6.84 (dt,  $J = 10.1, 4.2$  Hz, 1H), 6.00 (dt,  $J = 10.1, 2.1$  Hz, 1H), 2.15 (s, 2H), 2.12 (dd,  $J = 4.2, 2.1$  Hz, 2H), 0.81 – 0.68 (m, 2H), 0.37 – 0.25 (m, 8H).

$^{13}\text{C NMR}$  (101 MHz,  $\text{CDCl}_3$ ):  $\delta$  199.9, 148.4, 129.3, 46.4, 37.2, 34.6, 18.1 (2C), 0.8 (2C), 0.5 (2C).

**HRMS (ESI):** calculated for  $\text{C}_{12}\text{H}_{17}\text{O}^+$ ,  $[\text{M}+\text{H}]^+ = 177.1274$ ; found = 177.1272.

### 2-(Allyloxy)-5,5-dicyclopropylcyclohex-2-en-1-one (**4k**)

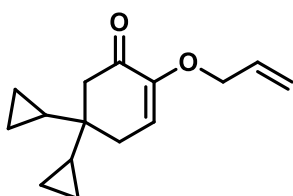

To a methanol solution (12 mL) of enone **S21** (972 mg, 5.52 mmol) 2.25 mL of  $\text{H}_2\text{O}_2$  (30%) were dropwise added at 0 °C, followed by 0.23 mL of 1 M NaOH solution. After stirring for 7 hours at 0 °C, the reaction mixture was extracted twice with



EtOAc and the combined organic phases were washed with brine and dried over Na<sub>2</sub>SO<sub>4</sub>. After evaporation of the solvents at reduced pressure the residue was dropwise added (as an allylic alcohol solution – 10 equiv. of allyl alcohol) to a cooled suspension of NaH (331 mg, 8.28 mmol, 60% mineral oil) in allyl alcohol (20 equiv.) at 0 °C. After 36 hours stirring at rt the reaction mixture was diluted with diethyl ether and water. After extraction of the aqueous phase with diethyl ether, the combined organic phases were washed with brine and dried over Na<sub>2</sub>SO<sub>4</sub>. After evaporation of the solvents at reduced pressure the residue was purified by flash chromatography on silica gel (5% EtOAc in *n*-pentane) to obtain 207 mg of **4k** as a pale yellow solid (16% yield).

**R<sub>f</sub>** = 0.19 (5% EtOAc in cyclohexane).

**mp** = 30-35 °C

**IR:**  $\tilde{\nu}$  [cm<sup>-1</sup>] = 2924, 2855, 1717, 1466, 1119, 973, 922.

**<sup>1</sup>H NMR** (300 MHz, CDCl<sub>3</sub>):  $\delta$  5.97 (ddt, *J* = 17.4, 10.7, 5.5 Hz, 1H), 5.70 (t, *J* = 4.6 Hz, 1H), 5.31 (*virt.* dq, *J* = 17.4, 1.6 Hz, 1H), 5.26 – 5.20 (m, 1H), 4.31 (*virt.* dt, *J* = 5.5, 1.6 Hz, 2H), 2.25 (s, 2H), 2.19 (d, *J* = 4.6 Hz, 2H), 0.82 – 0.70 (m, 2H), 0.39 – 0.23 (m, 8H).

**<sup>13</sup>C NMR** (75 MHz, CDCl<sub>3</sub>):  $\delta$  194.2, 149.9, 133.0, 118.0, 115.9, 68.8, 47.0, 37.1, 33.0, 18.1 (2C), 0.9 (2C), 0.6 (2C).

**HRMS (ESI):** calculated for C<sub>15</sub>H<sub>20</sub>NaO<sub>2</sub><sup>+</sup>, [M+Na]<sup>+</sup> = 255.1356; found = 255.1355.

### 3-Ethoxy-4,4-dimethylcyclohex-2-en-1-one (S22)

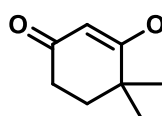

4,4-Dimethyl-1,3-cyclohexandione (5.03 g, 35.9 mmol) was stirred for 18 hours at reflux conditions in a Dean-Stark apparatus in the presence of *p*-TsOH (171 mg, 0.899 mmol), 6.8 mL of ethanol and 54 mL of toluene. After cooling to rt the solvents were removed at reduced pressure and the residue was purified by flash chromatography on silica gel (from 5% to 20% EtOAc in hexanes) to obtain 1.32 g of **S22** as a colourless oil (22% yield).

**R<sub>f</sub>** = 0.18 (20% EtOAc in hexanes).

The NMR data were in accordance with the data reported in the literature.<sup>11</sup>

**<sup>1</sup>H NMR** (300 MHz, CDCl<sub>3</sub>):  $\delta$  5.24 (s, 1H), 3.87 (q, *J* = 7.0 Hz, 2H), 2.40 (t, *J* = 6.7 Hz, 2H), 1.82 (t, *J* = 6.7 Hz, 2H), 1.36 (t, *J* = 7.0 Hz, 3H), 1.20 (s, 6H).

### 6,6-Dimethylcyclohex-2-en-1-one (S23)

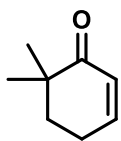

A solution of enone **S22** (1.32 g, 7.85 mmol) in 8.0 mL of dry Et<sub>2</sub>O was dropwise added to a suspension of LiAlH<sub>4</sub> (99.3 mg, 2.62 mmol) in 26 mL of dry Et<sub>2</sub>O at 0 °C. After stirring for 12 hours at rt the reaction mixture was quenched with water and stirred for 1 hour at rt in the presence of 50 mL of a 10% aq. solution of sulfuric acid. After extraction with diethyl ether, the combined organic phases were washed with a saturated solution of NaHCO<sub>3</sub>, brine and dried over Na<sub>2</sub>SO<sub>4</sub>. Thus, after evaporation of the solvents at reduced pressure, the residue was purified by flash chromatography on silica gel (10% EtOAc in hexanes) to obtain 550 mg of **S23** as a colourless oil (56% yield).

$R_f = 0.44$  (10% EtOAc in hexanes).

The NMR data were in accordance with the data reported in the literature.<sup>11</sup>

<sup>1</sup>H NMR (300 MHz, CDCl<sub>3</sub>): δ 6.86 (dt,  $J = 10.0, 4.0$  Hz, 1H), 5.91 (dt,  $J = 10.0, 2.0$  Hz, 1H), 2.37 (tdd,  $J = 6.1, 4.0, 2.0$  Hz, 2H), 1.83 (t,  $J = 6.1$  Hz, 2H), 1.11 (s, 6H).

### 2-(Allyloxy)-6,6-dimethylcyclohex-2-en-1-one (4I)

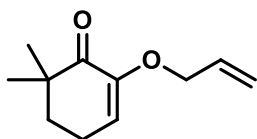

To a methanol solution (8.8 mL) of enone **S23** (550 mg, 4.43 mmol) 1.3 mL of H<sub>2</sub>O<sub>2</sub> (30%) were dropwise added at 0 °C, followed by 0.14 mL of 1 M NaOH solution. After stirring for 22 hours at rt the reaction mixture was extracted twice with DCM and the combined organic phases were washed with brine and dried over Na<sub>2</sub>SO<sub>4</sub>. After evaporation of the solvents at reduced pressure the residue was dropwise added (as an allylic alcohol solution – 10 equiv. of allyl alcohol) to a cooled suspension of NaH (354 mg, 8.86 mmol, 60% mineral oil) in allyl alcohol (20 equiv.) at 0 °C. After 34 hours stirring at rt the reaction mixture was diluted with diethyl ether and water. After extraction of the aqueous phase with diethyl ether, the combined organic phases were washed with brine and dried over Na<sub>2</sub>SO<sub>4</sub>. After evaporation of the solvents at reduced pressure the residue was purified by flash chromatography on silica gel (6% EtOAc in hexanes) to obtain 480 mg of **4I** as a pale-yellow oil (60% yield).

$R_f = 0.12$  (5% EtOAc in hexanes).

IR:  $\tilde{\nu}$  [cm<sup>-1</sup>] = 2922, 2851, 1686, 1628, 1232, 1210, 1091, 1062, 923, 826.

<sup>1</sup>H NMR (500 MHz, CDCl<sub>3</sub>): δ 5.98 (ddt,  $J = 17.3, 10.6, 5.4$  Hz, 1H), 5.79 (t,  $J = 4.5$  Hz, 1H), 5.33 (*virt.* dq,  $J = 17.3, 1.5$  Hz, 1H), 5.24 (*virt.* dq,  $J = 10.6, 1.5$  Hz, 1H), 4.29 (*virt.*

dt,  $J = 5.4, 1.5$  Hz, 2H), 2.40 (td,  $J = 6.1, 4.5$  Hz, 2H), 1.80 (t,  $J = 6.1$  Hz, 2H), 1.14 (s, 6H).

$^{13}\text{C}$  NMR (101 MHz,  $\text{CD}_2\text{Cl}_2$ ):  $\delta$  199.3, 149.0, 133.7, 117.9, 117.2, 69.0, 42.6, 36.5, 24.3 (2C), 21.4.

HRMS (ESI): calculated for  $\text{C}_{11}\text{H}_{16}\text{NaO}_2^+$ ,  $[\text{M}+\text{Na}]^+ = 203.1043$ ; found = 203.1039.

## 6. General Procedure for the Enantioselective [2+2] Photocycloaddition

An oven-dried Schlenk tube, equipped with a magnetic stir bar, was charged with catalyst **6** (1.73 mg, 2.00  $\mu\text{mol}$ ), the corresponding enone **4** (0.100 mmol) and 10 mL of dry DCE. The reaction mixture was deoxygenated by three cycles of “freeze-pump-thaw” and stirred at room temperature under blue LED irradiation ( $\lambda = 437$  nm), as illustrated in the reaction setup, for the indicated time. The solvent was removed under reduced pressure and the crude mixture was purified by flash chromatography to afford the corresponding cyclobutane **5** in stated yield and enantiomeric purity.

## 7. Characterisation Data for the Enantioenriched Cyclobutanes (**5**)

### (3*S*,3*aR*,7*aR*)-Hexahydro-7*H*-3,7*a*-methanobenzofuran-7-one. (**5a**)

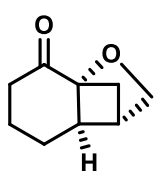

**5a** was prepared according to the general procedure after 14 hours of irradiation and purified by flash chromatography on silica gel (from 20 to 50% EtOAc in hexanes) to obtain 13.0 mg of product as a white solid (86% yield). The enantiomeric excess (92% *ee*) was determined by GC on a

*Macherey-Nagel Lipodex E* column [ $\tau_{\text{major}} = 14.8$  min,  $\tau_{\text{minor}} = 13.4$  min; 60 °C (1 min), 170 °C (15 °C/min), 200 °C (4 °C/min), 200 °C (5 min)].

$R_f = 0.28$  (50% EtOAc in hexanes).

$[\alpha]^{24}_{\text{D}} = +60$  ( $c = 0.94$ ,  $\text{CHCl}_3$ ).

The NMR data were in accordance with the data reported in the literature.<sup>2</sup>

$^1\text{H}$  NMR (500 MHz,  $\text{CDCl}_3$ ):  $\delta$  3.93 (d,  $J = 6.0$  Hz, 1H), 3.84 (d,  $J = 6.0$  Hz, 1H), 2.87 (d,  $J = 3.0$  Hz, 1H), 2.83 (dd,  $J = 8.1, 3.0$  Hz, 1H), 2.43 – 2.34 (m, 2H), 2.29 (*virt.* dt,  $J = 11.0, 7.1$  Hz, 1H), 2.22 – 2.04 (m, 2H), 1.92 – 1.80 (m, 2H), 1.75 – 1.62 (m, 1H).

**(3*S*,3*aR*,7*aR*)-3-Methylhexahydro-7*H*-3,7*a*-methanobenzofuran-7-one (5b)**

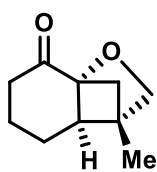

**5b** was prepared according to the general procedure after 14 hours of irradiation and purified by flash chromatography on silica gel (from 20 to 50% EtOAc in hexanes) to obtain 6.8 mg of product as a white solid (41% yield). The enantiomeric excess (84% *ee*) was determined by GC on a

*Macherey-Nagel Lipodex E* column [ $\tau_{\text{major}} = 14.3$  min,  $\tau_{\text{minor}} = 13.0$  min; 60 °C (1 min), 170 °C (15 °C/min), 200 °C (4 °C/min), 200 °C (5 min)].

$R_f = 0.37$  (50% EtOAc in hexanes).

$[\alpha]^{24}_{\text{D}} = +53$  ( $c = 0.86$ ,  $\text{CHCl}_3$ ).

The NMR data were in accordance with the data reported in the literature.<sup>2</sup>

$^1\text{H NMR}$  (500 MHz,  $\text{CDCl}_3$ ):  $\delta$  3.74 (d,  $J = 5.9$  Hz, 1H), 3.64 (dd,  $J = 5.9, 1.2$  Hz, 1H), 2.59 (d,  $J = 8.0$  Hz, 1H), 2.41 – 2.29 (m, 2H), 2.26 – 2.20 (m, 1H), 2.14 (*virt.* ddt,  $J = 11.1, 6.2, 2.9$  Hz, 1H), 2.02 – 1.95 (m, 1H), 1.87 (*virt.* t,  $J = 8.0$  Hz, 1H), 1.82 – 1.64 (m, 2H), 1.24 (s, 3H).

**(3*S*,3*aR*,7*aR*,8*R*)-8-Methylhexahydro-7*H*-3,7*a*-methanobenzofuran-7-one (5c)**

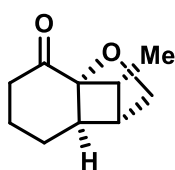

**5c** was prepared according to the general procedure after 24 hours of irradiation and purified by flash chromatography on silica gel (from 10 to 40% EtOAc in hexanes) to obtain 11.4 mg of product as a white solid (69% yield). The enantiomeric excess (81% *ee*) was determined by GC

on a *Macherey-Nagel Lipodex E* column [ $\tau_{\text{major}} = 25.3$  min,  $\tau_{\text{minor}} = 22.0$  min; 100 °C (1 min), 150 °C (15 °C/min), 150 °C (30 min), 200 °C (15 °C/min)].

$R_f = 0.23$  (33% EtOAc in hexanes).

$[\alpha]^{24}_{\text{D}} = +54$  ( $c = 0.82$ ,  $\text{CHCl}_3$ ).

The NMR data were in accordance with the data reported in the literature.<sup>2</sup>

$^1\text{H NMR}$  (500 MHz,  $\text{CDCl}_3$ ):  $\delta$  3.88 (d,  $J = 6.5$  Hz, 1H), 3.75 (d,  $J = 6.5$  Hz, 1H), 3.05 (qd,  $J = 6.4, 2.9$  Hz, 1H), 2.65 (d,  $J = 2.9$  Hz, 1H), 2.41 – 2.28 (m, 2H), 2.21 (dd,  $J = 11.0, 6.7$  Hz, 1H), 2.14 – 2.07 (m, 1H), 2.07 – 2.00 (m, 1H), 1.91 (*virt.* tdd,  $J = 14.1, 11.0, 3.7$  Hz, 1H), 1.75 – 1.63 (m, 1H), 0.90 (d,  $J = 6.4$  Hz, 3H).

**(3*R*,3*aR*,7*aS*,8*S*)-8-[(Benzyloxy)methyl]hexahydro-7*H*-3,7*a*-methanobenzofuran-7-one (5d)**

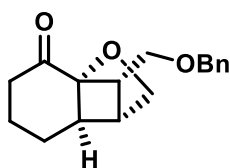

**5d** was prepared according to the general procedure after 14 hours of irradiation and purified by flash chromatography on silica gel (25% EtOAc in cyclohexane) to obtain 12.6 mg of product as a yellow oil (46% yield). The enantiomeric excess (90% *ee*) was determined by reverse phase HPLC on a *Daicel Chiralcel* OJ-RH column [ $\tau_{\text{major}} = 11.9$  min,  $\tau_{\text{minor}} = 12.7$  min; flow rate 1.0 mL/min; acetonitrile:water = gradient from 20:80 to 100:0 in 30 min; T = 5 °C,  $\lambda = 215$  nm].

$R_f = 0.17$  (25% EtOAc in cyclohexane).

**IR:**  $\tilde{\nu}$  [cm<sup>-1</sup>] = 2925, 1717, 1452, 1274, 1114, 714.

$[\alpha]^{24}_{\text{D}} = +31$  ( $c = 1.26$ , CHCl<sub>3</sub>).

**<sup>1</sup>H NMR** (500 MHz, CDCl<sub>3</sub>):  $\delta$  7.35 – 7.30 (m, 2H), 7.29 – 7.24 (m, 3H), 4.48 (d,  $J = 11.9$  Hz, 1H), 4.38 (d,  $J = 11.9$  Hz, 1H), 3.76 (s, 2H), 3.47 (dd,  $J = 10.0, 7.2$  Hz, 1H), 3.38 (dd,  $J = 10.0, 5.5$  Hz, 1H), 3.21 (ddd,  $J = 7.2, 5.5, 2.9$  Hz, 1H), 2.84 (d,  $J = 2.9$  Hz, 1H), 2.48 – 2.33 (m, 2H), 2.24 (dd,  $J = 10.9, 6.6$  Hz, 1H), 2.12 (*virt.* ddq,  $J = 14.0, 5.2, 2.8$  Hz, 1H), 2.08 – 2.01 (m, 1H), 1.93 (*virt.* tdd,  $J = 14.2, 10.9, 3.7$  Hz, 1H), 1.70 (*virt.* qt,  $J = 13.5, 4.3$  Hz, 1H).

**<sup>13</sup>C NMR** (101 MHz, CDCl<sub>3</sub>):  $\delta$  203.2, 138.2, 128.5 (2C), 127.8 (3C), 88.4, 73.6, 67.9, 65.4, 53.4, 49.7, 43.3, 40.0, 27.2, 24.3.

**HRMS (ESI):** calculated for C<sub>17</sub>H<sub>20</sub>NaO<sub>3</sub><sup>+</sup>, [M+Na]<sup>+</sup> = 295.1305; found = 295.1305.

**(3*R*,3*aR*,7*aS*,8*S*)-8-(Methoxymethyl)hexahydro-7*H*-3,7*a*-methanobenzofuran-7-one (5e)**

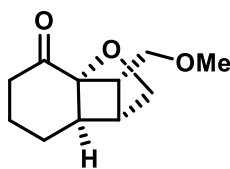

**5e** was prepared according to the general procedure after 14 hours of irradiation and purified by flash chromatography on silica gel (from 20 to 50% EtOAc in hexanes) to obtain 8.5 mg of product as a colorless oil (43% yield). The enantiomeric excess (94% *ee*) was determined by GC on a *Macherey-Nagel Lipodex E* column [ $\tau_{\text{major}} = 28.7$  min,  $\tau_{\text{minor}} = 32.3$  min; 100 °C (1 min), 150 °C (15 °C/min), 150 °C (30 min), 200 °C (15 °C/min)].

$R_f = 0.18$  (50% EtOAc in hexanes).

**IR:**  $\tilde{\nu}$  [cm<sup>-1</sup>] = 2925, 1716, 1460, 1109, 848, 750.

$[\alpha]^{24}_{\text{D}} = +37$  ( $c = 0.92$ , CHCl<sub>3</sub>).

**<sup>1</sup>H NMR** (500 MHz, CDCl<sub>3</sub>): δ 3.81 (d, *J* = 6.8 Hz, 1H), 3.78 (d, *J* = 6.8 Hz, 1H), 3.37 (dd, *J* = 10.1, 7.2 Hz, 1H), 3.29 (dd, *J* = 10.1, 5.3 Hz, 1H), 3.26 (s, 3H), 3.16 (ddd, *J* = 7.2, 5.3, 2.9 Hz, 1H), 2.84 (d, *J* = 2.9 Hz, 1H), 2.48 – 2.33 (m, 2H), 2.23 (dd, *J* = 11.0, 6.7 Hz, 1H), 2.16 – 2.09 (m, 1H), 2.09 – 2.02 (m, 1H), 1.93 (*virt.* tdd, *J* = 14.2, 11.0, 3.8 Hz, 1H), 1.70 (*virt.* qt, *J* = 13.5, 4.4 Hz, 1H).

**<sup>13</sup>C NMR** (126 MHz, CDCl<sub>3</sub>): δ 203.3, 88.4, 68.0, 67.8, 59.3, 53.4, 49.6, 43.2, 40.0, 27.2, 24.3.

**HRMS (ESI)**: calculated for C<sub>11</sub>H<sub>16</sub>NaO<sub>3</sub><sup>+</sup>, [M+Na]<sup>+</sup> = 219.0992; found = 219.0993.

**(3*R*,3*aR*,7*aS*,8*S*)-8-[[*(*4-Bromobenzyl*)*oxy]methyl]hexahydro-7*H*-3,7*a*-methanobenzofuran-7-one (5f)**

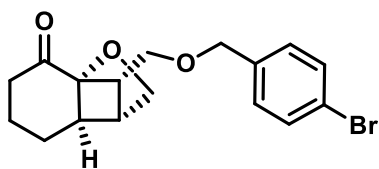

**5f** was prepared according to the general procedure after 14 hours of irradiation and purified by flash chromatography on silica gel (30% EtOAc in hexanes) to obtain 12.9 mg of product as a pale yellow solid (37% yield). The enantiomeric excess (92% *ee*) was determined by normal phase HPLC on a *Daicel Chiralpak AS-H* column [ $\tau_{\text{major}}$  = 24.0 min,  $\tau_{\text{minor}}$  = 28.8 min; flow rate 1.0 mL/min; *i*-PrOH:*n*-heptane = 10:90;  $\lambda$  = 210 nm].

**R<sub>f</sub>** = 0.15 (30% EtOAc in hexanes).

**mp** = 130 °C

**IR**:  $\tilde{\nu}$  [cm<sup>-1</sup>] = 2941, 1715, 1488, 1091, 1011, 845, 804.

**[ $\alpha$ ]<sup>24</sup><sub>D</sub>** = + 35 (*c* = 1.17, CHCl<sub>3</sub>).

**<sup>1</sup>H NMR** (500 MHz, CDCl<sub>3</sub>): δ 7.47 – 7.42 (m, 2H), 7.15 – 7.11 (m, 2H), 4.41 (d, *J* = 12.0 Hz, 1H), 4.33 (d, *J* = 12.0 Hz, 1H), 3.77 (d, *J* = 6.8 Hz, 1H), 3.75 (d, *J* = 6.8 Hz, 1H), 3.46 (dd, *J* = 9.9, 7.7 Hz, 1H), 3.36 (dd, *J* = 9.9, 5.2 Hz, 1H), 3.20 (ddd, *J* = 7.7, 5.2, 2.9 Hz, 1H), 2.84 (d, *J* = 2.9 Hz, 1H), 2.46 – 2.35 (m, 2H), 2.24 (dd, *J* = 10.9, 6.6 Hz, 1H), 2.16 – 2.09 (m, 1H), 2.09 – 2.02 (m, 1H), 1.93 (*virt.* tdd, *J* = 14.3, 10.9, 3.7 Hz, 1H), 1.76 – 1.65 (m, 1H).

**<sup>13</sup>C NMR** (75 MHz, CDCl<sub>3</sub>): δ 203.1, 137.3, 131.7 (2C), 129.4 (2C), 121.7, 88.4, 72.8, 67.9, 65.5, 53.3, 49.7, 43.3, 40.0, 27.2, 24.3.

**HRMS (ESI)**: calculated for C<sub>17</sub>H<sub>19</sub>BrNaO<sub>3</sub><sup>+</sup>, [M+Na]<sup>+</sup> = 373.0410; found = 373.0412.

**(3*S*,3*aR*,7*aR*)-5,5-Dimethylhexahydro-7*H*-3,7*a*-methanobenzofuran-7-one (5g)**

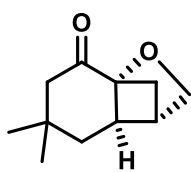

**5g** was prepared according to the general procedure after 14 hours of irradiation and purified by flash chromatography on silica gel (from 20 to 50% EtOAc in hexanes) to obtain 11.7 mg of product as a white solid (65% yield). The enantiomeric excess (84% *ee*) was determined by GC

on a *Macherey-Nagel Lipodex E* column [ $\tau_{\text{major}} = 12.9$  min,  $\tau_{\text{minor}} = 12.5$  min; 60 °C (1 min), 170 °C (15 °C/min), 200 °C (4 °C/min), 200 °C (5 min)].

$R_f = 0.36$  (50% EtOAc in hexanes).

$[\alpha]^{24}_{\text{D}} = +17$  ( $c = 0.96$ ,  $\text{CHCl}_3$ ).

The NMR data were in accordance with the data reported in the literature.<sup>2</sup>

**$^1\text{H}$  NMR** (500 MHz,  $\text{CDCl}_3$ ):  $\delta$  3.96 (d,  $J = 6.1$  Hz, 1H), 3.89 (d,  $J = 6.1$  Hz, 1H), 2.84 (d,  $J = 3.1$  Hz, 1H), 2.80 (ddd,  $J = 8.0, 3.1, 1.1$  Hz, 1H), 2.42 – 2.35 (m, 2H), 2.05 (dd,  $J = 14.2, 2.3$  Hz, 1H), 1.90 – 1.83 (m, 2H), 1.79 (ddd,  $J = 14.2, 6.9, 2.3$  Hz, 1H), 1.10 (s, 3H), 0.88 (s, 3H).

**(3'*S*,3*a'R*,7*a'R*)-Tetrahydrospiro{cyclobutane-1,5'-[3,7*a*]methanobenzofuran}-7'(6'*H*)-one (5h)**

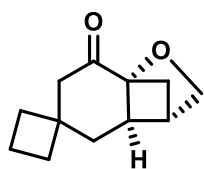

**5h** was prepared according to the general procedure after 14 hours of irradiation and purified by flash chromatography on silica gel (from 20 to 50% EtOAc in hexanes) to obtain 11.4 mg of product as a white solid (59% yield). The enantiomeric excess (80% *ee*) was determined by GC

on a *Macherey-Nagel Lipodex E* column [ $\tau_{\text{major}} = 16.0$  min,  $\tau_{\text{minor}} = 14.9$  min; 60 °C (1 min), 170 °C (15 °C/min), 200 °C (4 °C/min), 200 °C (5 min)].

$R_f = 0.43$  (50% EtOAc in hexanes).

**mp** = 58-62 °C

**IR:**  $\tilde{\nu}$  [ $\text{cm}^{-1}$ ] = 2929, 1715, 1469, 1422, 1127, 983, 899, 750.

$[\alpha]^{24}_{\text{D}} = +22$  ( $c = 1.2$ ,  $\text{CHCl}_3$ ).

**$^1\text{H}$  NMR** (400 MHz,  $\text{CDCl}_3$ ):  $\delta$  3.94 (d,  $J = 6.0$  Hz, 1H), 3.86 (d,  $J = 6.0$  Hz, 1H), 2.84 (d,  $J = 3.1$  Hz, 1H), 2.81 (ddd,  $J = 7.9, 3.1, 1.1$  Hz, 1H), 2.52 (dd,  $J = 14.1, 2.2$  Hz, 1H), 2.45 (d,  $J = 14.1$  Hz, 1H), 2.32 (ddd,  $J = 11.2, 7.9, 6.4$  Hz, 1H), 2.18 (ddd,  $J = 13.9, 6.4, 2.2$  Hz, 1H), 1.99 – 1.81 (m, 6H), 1.77 – 1.71 (m, 2H).

**$^{13}\text{C}$  NMR** (101 MHz,  $\text{CDCl}_3$ ):  $\delta$  202.9, 88.6, 71.3, 52.4, 51.5, 45.8, 41.3, 41.2, 36.9, 33.2, 30.7, 15.5.

**HRMS (ESI):** calculated for  $\text{C}_{12}\text{H}_{17}\text{O}_2^+$ ,  $[\text{M}+\text{H}]^+ = 193.1223$ ; found = 193.1223.

**(3'S,3a'R,7a'R)-Tetrahydrospiro{cyclohexane-1,5'-[3,7a]methanobenzofuran}-7'(6'H)-one (5i)**

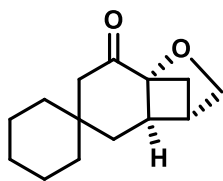

**5i** was prepared according to the general procedure after 14 hours of irradiation and purified by flash chromatography on silica gel (from 20 to 50% EtOAc in hexanes) to obtain 10.3 mg of product as a white solid (47% yield). The enantiomeric excess (80% *ee*) was determined by GC on a *Macherey-Nagel Lipodex E* column [ $\tau_{\text{major}} = 21.3$  min,  $\tau_{\text{minor}} = 20.6$  min; 60 °C (1 min), 170 °C (15 °C/min), 200 °C (4 °C/min), 200 °C (25 min)].

$R_f = 0.52$  (50% EtOAc in hexanes).

**mp** = 55-60 °C

**IR:**  $\tilde{\nu}$  [ $\text{cm}^{-1}$ ] = 2925, 2854, 1715, 1453, 1120, 966, 927.

$[\alpha]^{24}_{\text{D}} = +7$  ( $c = 0.75$ ,  $\text{CHCl}_3$ ).

**$^1\text{H NMR}$**  (500 MHz,  $\text{CDCl}_3$ ):  $\delta$  3.95 (d,  $J = 6.1$  Hz, 1H), 3.87 (d,  $J = 6.1$  Hz, 1H), 2.83 (d,  $J = 3.1$  Hz, 1H), 2.81 (ddd,  $J = 7.9, 3.1, 1.0$  Hz, 1H), 2.37 – 2.29 (m, 2H), 2.22 (d,  $J = 14.2$  Hz, 1H), 2.10 (ddd,  $J = 14.2, 6.6, 2.4$  Hz, 1H), 1.85 (*virt. t.*,  $J = 7.8$  Hz, 1H), 1.66 (dd,  $J = 14.2, 11.6$  Hz, 1H), 1.51 – 1.34 (m, 8H), 1.28 – 1.21 (m, 2H).

**$^{13}\text{C NMR}$**  (101 MHz,  $\text{CDCl}_3$ ):  $\delta$  203.4, 88.8, 71.6, 52.0, 50.8, 42.7, 41.2, 41.1, 39.7, 35.2, 33.1, 26.0, 22.0, 21.1.

**HRMS (ESI):** calculated for  $\text{C}_{14}\text{H}_{20}\text{NaO}_2^+$ ,  $[\text{M}+\text{Na}]^+ = 243.1356$ ; found = 243.1353.

**(3S,3aR,7aR)-5,5-Dipropylhexahydro-7H-3,7a-methanobenzofuran-7-one (5j)**

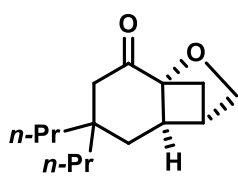

**5j** was prepared according to the general procedure after 14 hours of irradiation and purified by flash chromatography on silica gel (from 10 to 40% EtOAc in hexanes) to obtain 17.2 mg of product as a pale yellow solid (73% yield). The enantiomeric excess (83% *ee*) was

determined by GC on an *Agilent CycloSil-B* column [ $\tau_{\text{major}} = 43.7$  min,  $\tau_{\text{minor}} = 43.2$  min; 60 °C (1 min), 220 °C (3 °C/min), 220 °C (5 min)] after diastereoselective reduction to the corresponding alcohol (**10a**).

$R_f = 0.24$  (25% EtOAc in cyclohexane).

**mp** = 75-80 °C

**IR:**  $\tilde{\nu}$  [ $\text{cm}^{-1}$ ] = 2957, 2927, 1717, 1466, 974, 923.

$[\alpha]^{24}_{\text{D}} = +9.82$  ( $c = 1.72$ ,  $\text{CHCl}_3$ ).

**$^1\text{H NMR}$**  (500 MHz,  $\text{CDCl}_3$ ):  $\delta$  3.96 (d,  $J = 6.0$  Hz, 1H), 3.88 (d,  $J = 6.0$  Hz, 1H), 2.82 (d,  $J = 3.1$  Hz, 1H), 2.79 (ddd,  $J = 8.1, 3.1, 1.1$  Hz, 1H), 2.35 – 2.26 (m, 2H), 2.15 (dd,  $J$



= 14.2, 2.4 Hz, 1H), 1.90 (ddd,  $J = 14.2, 6.6, 2.4$  Hz, 1H), 1.85 (*virt. t.*,  $J = 7.8$  Hz, 1H), 1.74 (dd,  $J = 14.2, 11.4$  Hz, 1H), 1.34 – 1.07 (m, 8H), 0.90 (t,  $J = 7.0$  Hz, 3H), 0.83 (t,  $J = 6.9$  Hz, 3H).

$^{13}\text{C}$  NMR (75 MHz,  $\text{CDCl}_3$ ):  $\delta$  203.7, 88.7, 71.6, 52.2, 50.1, 45.3, 42.3, 41.3, 41.1, 36.9, 33.9, 16.7, 16.1, 14.9, 14.7.

HRMS (ESI): calculated for  $\text{C}_{15}\text{H}_{24}\text{NaO}_2^+$ ,  $[\text{M}+\text{Na}]^+ = 259.1669$ ; found = 259.1643.

**(3*S*,3*aR*,7*aR*)-5,5-Dicyclopropylhexahydro-7*H*-3,7*a*-methanobenzofuran-7-one (5k)**

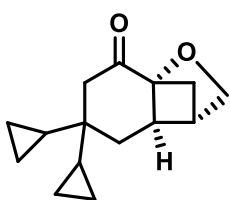

**5k** was prepared according to the general procedure after 14 hours of irradiation and purified by flash chromatography on silica gel (from 10 to 40% EtOAc in hexanes) to obtain 19.0 mg of product as a pale yellow solid (82% yield). The enantiomeric excess (81% *ee*) was determined by GC on an *Agilent CycloSil-B* column [ $\tau_{\text{major}} = 201.6$  min,  $\tau_{\text{minor}} = 200.3$  min; 60 °C (1 min), 170 °C (0.5 °C/min), 170 °C (5 min)] after diastereoselective reduction to the corresponding alcohol (**10b**).

$R_f = 0.27$  (25% EtOAc in cyclohexane).

mp = 40 °C

IR:  $\tilde{\nu}$  [ $\text{cm}^{-1}$ ] = 2925, 2855, 1717, 1466, 1275, 1119, 973, 922.

$[\alpha]^{24}_{\text{D}} = +23$  ( $c = 1.57$ ,  $\text{CHCl}_3$ ).

$^1\text{H}$  NMR (500 MHz,  $\text{CDCl}_3$ ):  $\delta$  3.97 (d,  $J = 6.1$  Hz, 1H), 3.89 (d,  $J = 6.1$  Hz, 1H), 2.84 (d,  $J = 3.0$  Hz, 1H), 2.74 (ddd,  $J = 8.1, 3.0, 1.0$  Hz, 1H), 2.54 (*virt. dt.*,  $J = 11.3, 7.3$  Hz, 1H), 2.15 (d,  $J = 14.6$  Hz, 1H), 2.02 (dd,  $J = 14.6, 2.3$  Hz, 1H), 1.89 – 1.80 (m, 2H), 1.75 (dd,  $J = 13.9, 11.3$  Hz, 1H), 0.66 (tt,  $J = 8.3, 5.9$  Hz, 1H), 0.53 – 0.42 (m, 2H), 0.42 – 0.23 (m, 7H).

$^{13}\text{C}$  NMR (75 MHz,  $\text{CDCl}_3$ ):  $\delta$  203.8, 88.5, 71.5, 51.6, 47.3, 42.8, 41.5, 41.3, 33.9, 18.3, 17.5, 1.4, 0.2, 0.1 (2C).

HRMS (ESI): calculated for  $\text{C}_{15}\text{H}_{20}\text{NaO}_2^+$ ,  $[\text{M}+\text{Na}]^+ = 255.1356$ ; found = 255.1355.

**(3*S*,3*aR*,7*aR*)-6,6-Dimethylhexahydro-7*H*-3,7*a*-methanobenzofuran-7-one (5l)**

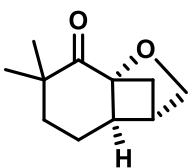

**5l** was prepared according to the general procedure after 24 hours of irradiation and purified by flash chromatography on silica gel (20% EtOAc in *n*-pentane) to obtain 6.8 mg of product as a yellow oil (38% yield). The enantiomeric excess (90% *ee*) was determined by GC on a

*Macherey-Nagel Lipodex E* column [ $\tau_{\text{major}} = 24.3$  min,  $\tau_{\text{minor}} = 26.3$  min; 100 °C (1 min), 135 °C (15 °C/min), 135 °C (30 min), 200 °C (15 °C/min)].

$R_f = 0.15$  (20% EtOAc in *n*-pentane).

**IR:**  $\tilde{\nu}$  [cm<sup>-1</sup>] = 2926, 1706, 1466, 1019, 968, 945, 935, 865.

$[\alpha]^{24}_{\text{D}} = -39$  ( $c = 1.2$ , CHCl<sub>3</sub>).

**<sup>1</sup>H NMR** (500 MHz, CDCl<sub>3</sub>):  $\delta$  3.92 (d,  $J = 5.9$  Hz, 1H), 3.79 (d,  $J = 5.9$  Hz, 1H), 2.92 (ddd,  $J = 8.2, 3.2, 1.0$  Hz, 1H), 2.86 (d,  $J = 3.2$  Hz, 1H), 2.26 (*virt. dt.*,  $J = 9.9, 7.8$  Hz, 1H), 2.05 – 1.93 (m, 3H), 1.78 (*virt. dt.*,  $J = 14.1, 3.5$  Hz, 1H), 1.67 (ddd,  $J = 14.2, 11.5, 5.8$  Hz, 1H), 1.23 (s, 3H), 1.12 (s, 3H).

**<sup>13</sup>C NMR** (126 MHz, CDCl<sub>3</sub>):  $\delta$  208.2, 87.3, 70.4, 54.5, 45.0, 44.0, 41.9, 40.1, 26.1, 25.7, 21.4.

**HRMS (ESI):** calculated for C<sub>11</sub>H<sub>16</sub>NaO<sub>2</sub><sup>+</sup>,  $[M+Na]^+ = 203.1043$ ; found = 203.1041.

#### (3*S*,3*aR*,7*aR*,8*R*)-8-Ethylhexahydro-7*H*-3,7*a*-methanobenzofuran-7-one (**5m**)

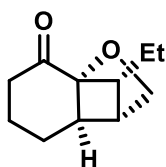

**5m** was prepared according to the general procedure starting from (*Z*)-**4m** after 14 hours of irradiation and purified by flash chromatography on silica gel (from 0 to 40% EtOAc in hexanes) to obtain 9.2 mg of a mixture of the desired cyclobutane and an olefinic impurity. This by-product was removed by oxidation as reported in our precedent work.<sup>2</sup> The product mixture (51.0  $\mu$ mol) was dissolved in 400  $\mu$ L of DCE. Subsequently, 300  $\mu$ L of water, RuCl<sub>3</sub>·*x*H<sub>2</sub>O (1 small crystal) and 6.3 mg of NaIO<sub>4</sub> (29.6  $\mu$ mol) were added and the reaction mixture was stirred at room temperature for 17 h. The reaction was quenched by addition of water and diluted with diethyl ether. The aqueous layer was extracted with diethyl ether and the combined organic phases were washed with brine and dried over Na<sub>2</sub>SO<sub>4</sub>. Thus, after evaporation of the solvents at reduced pressure, the residue was purified by flash chromatography on silica gel (from 0 to 40% EtOAc in hexanes) to obtain 8.2 mg of product as a white solid (47% yield). The enantiomeric excess (94% *ee*) was determined by GC on a *Macherey-Nagel Lipodex E* column [ $\tau_{\text{major}} = 25.1$  min,  $\tau_{\text{minor}} = 23.8$  min; 100 °C (1 min), 150 °C (15 °C/min), 150 °C (30 min), 200 °C (15 °C/min)]. When (*E*)-**4m** was employed as substrate, the same product was obtained in 47% yield and 86% *ee*.

$R_f = 0.22$  (25% EtOAc in hexanes).

$[\alpha]^{24}_{\text{D}} = +39$  ( $c = 0.70$ , CHCl<sub>3</sub>).

The NMR data were in accordance with the data reported in the literature.<sup>2</sup>

**<sup>1</sup>H NMR** (500 MHz, CDCl<sub>3</sub>): δ 3.85 (d, *J* = 6.5 Hz, 1H), 3.74 (d, *J* = 6.5 Hz, 1H), 2.83 (ddd, *J* = 8.6, 6.1, 2.9 Hz, 1H), 2.71 (d, *J* = 2.9 Hz, 1H), 2.41 – 2.34 (m, 2H), 2.20 (dd, *J* = 11.0, 6.7 Hz, 1H), 2.15 – 2.09 (m, 1H), 2.07 – 1.99 (m, 1H), 1.92 (*virt.* tdd, *J* = 14.2, 11.0, 3.8 Hz, 1H), 1.76 – 1.64 (m, 1H), 1.49 – 1.36 (m, 1H), 1.30 – 1.20 (m, 1H), 0.78 (t, *J* = 7.5 Hz, 3H).

## 8. Characterisation Data for the Hydrazone (7)

### *N'*-[(3*S*,3*aR*,7*aR*,*Z*)-Hexahydro-7*H*-3,7*a*-methanobenzofuran-7-ylidene]-4-nitrobenzenesulfonylhydrazide (7)

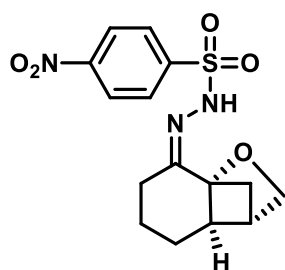

11.2 mg (73.6 μmol) of **5a** (*ee* of the sample = 92%) were dissolved in anhydrous CH<sub>2</sub>Cl<sub>2</sub> (1.0 mL) and 4-nitrobenzenesulfonylhydrazide (16.0 mg, 1.0 equiv.) were added. The reaction mixture was stirred overnight at room temperature and, after solvent removal, purified by flash chromatography on silica gel (20% EtOAc in hexanes) to obtain

19.0 mg of the desired product **7** as a pale yellow solid (73% yield).

**R<sub>f</sub>** = 0.30 (33% EtOAc in hexanes).

**mp** = 145-150 °C

**IR:**  $\tilde{\nu}$  [cm<sup>-1</sup>] = 3189, 2957, 2893, 1534, 1349, 1308, 1172, 1054, 922, 898, 851, 736, 681.

**[α]<sup>24</sup><sub>D</sub>** = + 80 (*c* = 1.00, CHCl<sub>3</sub>).

**<sup>1</sup>H NMR** (500 MHz, CDCl<sub>3</sub>): δ 10.44 (s, 1H), 8.37 – 8.32 (m, 2H), 8.14 – 8.09 (m, 2H), 3.97 (d, *J* = 5.9 Hz, 1H), 3.86 (d, *J* = 5.9 Hz, 1H), 2.75 (d, *J* = 3.2 Hz, 1H), 2.59 (dd, *J* = 8.4, 3.2 Hz, 1H), 2.43 (*virt.* dt, *J* = 15.8, 3.4 Hz, 1H), 2.09 – 1.85 (m, 4H), 1.79 (*virt.* t, *J* = 8.0 Hz, 1H), 1.62 – 1.51 (m, 1H), 1.33 – 1.22 (m, 1H).

**<sup>13</sup>C NMR** (101 MHz, CDCl<sub>3</sub>): δ 151.5, 150.3, 145.0, 129.2 (2C), 124.2 (2C), 87.7, 71.6, 53.7, 40.2, 40.0, 32.8, 25.3, 25.0.

**HRMS (ESI):** calculated for C<sub>15</sub>H<sub>18</sub>N<sub>3</sub>O<sub>5</sub>S<sup>+</sup>, [M+H]<sup>+</sup> = 352.0962; found = 352.0964.

## 9. Characterisation Data for the Derivatized Cyclobutanes (10-15)

### (3*S*,3*aR*,7*S*,7*aR*)-5,5-Dipropylhexahydro-2*H*-3,7*a*-methanobenzofuran-7-ol (10a)

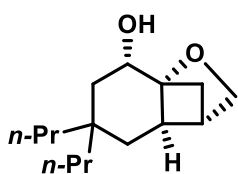

The diastereoselective reduction was achieved upon dropwise addition of DIBAL-H (0.364 mmol, 364  $\mu$ L of a 1 M solution in hexanes, 5.0 equiv.) to a solution of ketone **5j** (17.2 mg, 72.8  $\mu$ mol) in dry  $\text{CH}_2\text{Cl}_2$  (1.5 mL) at  $-78^\circ\text{C}$ . After 90 min the reaction was quenched with a saturated solution of  $\text{NH}_4\text{Cl}$  and extracted with EtOAc. After removal of the solvents at reduced pressure the residue was purified by flash chromatography on silica gel (8% EtOAc in *n*-pentane) to obtain 17.1 mg of product as a colourless oil (99% yield).

$R_f = 0.25$  (10% EtOAc in *n*-pentane).

**IR:**  $\tilde{\nu}$  [ $\text{cm}^{-1}$ ] = 2924, 2855, 1731, 1464, 1288, 965.

$[\alpha]^{24}_{\text{D}} = -54$  ( $c = 0.33$ ,  $\text{CHCl}_3$ ).

**$^1\text{H}$  NMR** (500 MHz,  $\text{CDCl}_3$ ):  $\delta$  4.04 (dd,  $J = 3.7, 2.5$  Hz, 1H), 3.87 – 3.82 (m, 2H), 2.67 (d,  $J = 3.1$  Hz, 1H), 2.27 (dd,  $J = 8.1, 3.1$  Hz, 1H), 2.06 – 1.92 (m, 2H), 1.84 (*virt. dt*,  $J = 15.1, 2.5$  Hz, 1H), 1.79 (ddd,  $J = 13.8, 6.5, 2.5$  Hz, 1H), 1.55 (ddd,  $J = 13.8, 12.3, 4.2$  Hz, 1H), 1.47 – 1.36 (m, 2H), 1.32 – 1.10 (m, 8H), 0.90 – 0.83 (m, 6H).

**$^{13}\text{C}$  NMR** (75 MHz,  $\text{CDCl}_3$ ):  $\delta$  88.8, 71.2, 66.4, 44.1, 43.3, 40.0, 39.0, 37.3, 37.2, 35.6, 35.3, 16.7, 16.3, 15.2, 15.1.

**HRMS (ESI):** calculated for  $\text{C}_{15}\text{H}_{26}\text{NaO}_2^+$ ,  $[\text{M}+\text{Na}]^+ = 261.1825$ ; found = 261.1828.

### (3*S*,3*aR*,7*S*,7*aR*)-5,5-Dicyclopropylhexahydro-2*H*-3,7*a*-methanobenzofuran-7-ol (10b)

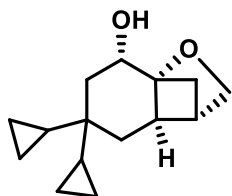

The diastereoselective reduction was achieved upon dropwise addition of DIBAL-H (0.323 mmol, 323  $\mu$ L of a 1.0 M solution in hexanes, 5.0 equiv.) to a solution of ketone **5k** (15.0 mg, 64.6  $\mu$ mol) in dry  $\text{CH}_2\text{Cl}_2$  (1.3 mL) at  $-78^\circ\text{C}$ . After 90 min the reaction was quenched with a saturated solution of  $\text{NH}_4\text{Cl}$  and extracted with EtOAc. After removal of the solvents at reduced pressure the residue was purified by flash chromatography on silica gel (15% EtOAc in *n*-pentane) to obtain 10.6 mg of product as a colourless oil (70% yield).

$R_f = 0.12$  (10% EtOAc in *n*-pentane).

**IR:**  $\tilde{\nu}$  [ $\text{cm}^{-1}$ ] = 2923, 2856, 1733, 1465, 1289, 765.

$[\alpha]^{24}_{\text{D}} = -32$  ( $c = 1.2$ ,  $\text{CHCl}_3$ ).

$^1\text{H NMR}$  (500 MHz,  $\text{CDCl}_3$ ):  $\delta$  4.11 (dd,  $J = 3.9, 2.4$  Hz, 1H), 3.86 (s, 2H), 2.69 (d,  $J = 3.1$  Hz, 1H), 2.22 – 2.14 (m, 2H), 2.12 (br s, 1H), 1.73 (*virt. dt*,  $J = 14.9, 2.4$  Hz, 1H), 1.64 – 1.54 (m, 2H), 1.46 (*virt. t*,  $J = 7.9$  Hz, 1H), 1.32 (dd,  $J = 14.9, 3.9$  Hz, 1H), 1.17 (dd,  $J = 13.7, 11.1$  Hz, 1H), 0.56 – 0.44 (m, 2H), 0.41 – 0.29 (m, 2H), 0.29 – 0.10 (m, 5H).

$^{13}\text{C NMR}$  (101 MHz,  $\text{CDCl}_3$ ):  $\delta$  88.7, 71.1, 66.3, 42.8, 40.3, 38.6, 37.1, 33.0, 32.0, 19.2, 16.3, 1.4, 1.3, 0.2, -0.5.

**HRMS (ESI)**: calculated for  $\text{C}_{15}\text{H}_{22}\text{NaO}_2^+$ ,  $[\text{M}+\text{Na}]^+ = 257.1512$ ; found = 257.1511.

**(3*S*,3*aR*,7*aR*)-3,3*a*,4,5-tetrahydro-2*H*-3,7*a*-methanobenzofuran-7-yl trifluoromethanesulfonate (11)**

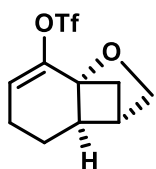

152 mg (1.00 mmol) of **5a** (*ee* of the sample = 92%) were dissolved in 3.5 mL of anhydrous THF and cooled to  $-78$  °C. Then, 1.50 mL (1.50 mmol) of a 1 M solution in THF of LHMDS was dropwise added and stirred at the same temperature for 2 hours. 1.43 g (4.00 equiv.) of  $\text{PhNTf}_2$

in 3.0 mL of anhydrous THF were dropwise added and stirred at  $-78$  °C for 30 min before removing the cooling bath and allowing the reaction mixture to stir for 12 hours at room temperature. The excess of LHMDS was quenched with a saturated aqueous solution of  $\text{NH}_4\text{Cl}$ , extracted with  $\text{Et}_2\text{O}$ , washed with brine and dried over  $\text{Na}_2\text{SO}_4$ . After removal of the solvents at reduced pressure the residue was purified by flash chromatography on basic alumina (10%  $\text{Et}_2\text{O}$  in *n*-pentane) to obtain 225 mg of product **11** as a colourless oil (79% yield).

$R_f = 0.23$  (10%  $\text{Et}_2\text{O}$  in *n*-pentane).

**IR**:  $\tilde{\nu}$  [ $\text{cm}^{-1}$ ] = 2894, 1416, 1204, 1142, 1039, 993, 898, 860, 811.

$[\alpha]^{24}_{\text{D}} = -61$  ( $c = 1.00$ ,  $\text{CHCl}_3$ ).

$^1\text{H NMR}$  (500 MHz,  $\text{CDCl}_3$ ):  $\delta$  5.84 (t,  $J = 4.1$  Hz, 1H), 3.96 (d,  $J = 5.9$  Hz, 1H), 3.90 (d,  $J = 5.9$  Hz, 1H), 2.81 (d,  $J = 3.1$  Hz, 1H), 2.40 – 2.35 (m, 2H), 2.32 (ddd,  $J = 8.2, 3.1, 1.2$  Hz, 1H), 2.18 (ddd,  $J = 12.7, 7.2, 5.1$  Hz, 1H), 2.09 – 2.03 (m, 1H), 1.93 – 1.81 (m, 2H).

$^{13}\text{C NMR}$  (101 MHz,  $\text{CDCl}_3$ ):  $\delta$  144.9, 123.5, 118.7 (q,  $J = 320.3$  Hz), 82.4, 72.1, 53.1, 42.6, 39.9, 25.7, 22.8.

$^{19}\text{F NMR}$  (376 MHz,  $\text{CDCl}_3$ ):  $\delta$  -73.8.

**HRMS (ESI)**: calculated for  $\text{C}_{10}\text{H}_{12}\text{F}_3\text{O}_4\text{S}^+$ ,  $[\text{M}+\text{H}]^+ = 285.0403$ ; found = 285.0403.

### (3*S*,3*aR*,7*aR*)-7-(*p*-tolyl)-3,3*a*,4,5-tetrahydro-2*H*-3,7*a*-methanobenzofuran (**12**)

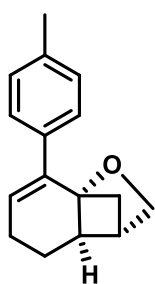

In an oven dried vial were placed 28.4 mg (0.100 mmol) of **11**, 16.3 mg (1.20 equiv.) of *p*-tolylboronic acid, 2.2 mg (0.10 equiv.) of Pd(OAc)<sub>2</sub>, 7.9 mg (0.30 equiv.) of PPh<sub>3</sub> and dissolved in 2.0 mL of 1,4-dioxane before adding 200 μL (2.00 equiv.) of a 1 M aqueous solution of Na<sub>2</sub>CO<sub>3</sub>. After purging the system with argon by bubbling for 5 min, the reaction mixture was stirred at rt until consumption of the starting material as judged by TLC (7 hours). Water was added to the reaction mixture, extracted with Et<sub>2</sub>O, washed with brine and dried over Na<sub>2</sub>SO<sub>4</sub>. After removal of the solvents at reduced pressure the residue was purified by preparative thin layer chromatography (10% Et<sub>2</sub>O in *n*-pentane) to obtain 16.5 mg of product **12** as a colourless oil (73% yield).

$R_f = 0.20$  (5% Et<sub>2</sub>O in *n*-pentane).

**IR:**  $\tilde{\nu}$  [cm<sup>-1</sup>] = 2927, 2850, 1514, 1436, 1342, 1137, 920, 797.

$[\alpha]_D^{24} = +9$  ( $c = 1.00$ , CHCl<sub>3</sub>).

**<sup>1</sup>H NMR** (400 MHz, CDCl<sub>3</sub>):  $\delta$  7.39 – 7.31 (m, 2H), 7.12 (d,  $J = 8.0$  Hz, 2H), 6.11 (dd,  $J = 5.6, 2.6$  Hz, 1H), 3.96 (d,  $J = 5.7$  Hz, 1H), 3.87 (d,  $J = 5.7$  Hz, 1H), 2.80 (d,  $J = 3.1$  Hz, 1H), 2.41 (ddd,  $J = 7.9, 3.1, 1.1$  Hz, 1H), 2.39 – 2.20 (m, 5H), 2.16 – 2.00 (m, 3H), 1.95 – 1.83 (m, 1H).

**<sup>13</sup>C NMR** (101 MHz, CDCl<sub>3</sub>):  $\delta$  136.7, 135.9, 135.2, 129.0 (2C), 128.7, 126.1 (2C), 86.7, 71.5, 50.9, 44.0, 39.7, 25.5, 23.5, 21.2.

**HRMS (ESI):** calculated for C<sub>16</sub>H<sub>19</sub>O<sup>+</sup>, [M+H]<sup>+</sup> = 227.1430; found = 227.1432.

### 3-{(1*R*,4*S*,5*R*)-1-(4-methylbenzoyl)-2-oxabicyclo[2.1.1]hexan-5-yl}propanal (**13**)

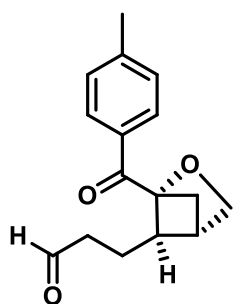

16.5 mg (72.9 μmol) of **12** were dissolved in 6.0 mL of anhydrous CH<sub>2</sub>Cl<sub>2</sub> and cooled to -78 °C. The solution was purged with argon and oxygen before switching on the ozone generator. Ozone was bubbled into the solution until the latter turned to blue. Thus, any excess of ozone was removed by subsequent purging by oxygen and argon and 38.2 mg (2.00 equiv.) of PPh<sub>3</sub> in anhydrous CH<sub>2</sub>Cl<sub>2</sub> were added. The reaction mixture was allowed to slowly warm to rt overnight and, after removal of the solvents under reduced pressure, the residue was purified by preparative thin layer chromatography (50% Et<sub>2</sub>O in *n*-pentane) to obtain 14.8 mg of product **13** as a colourless oil (79% yield). The enantiomeric excess (92% *ee*) was determined by reverse phase HPLC on a *Daicel Chiralcel* OD-RH column [ $\tau_{\text{major}} = 15.3$  min,  $\tau_{\text{minor}} = 14.8$  min;

flow rate 1.0 mL/min; acetonitrile:water = gradient from 20:80 to 100:0 in 30 min;  $\lambda$  = 215 nm].

$R_f$  = 0.17 (50% Et<sub>2</sub>O in *n*-pentane).

**IR:**  $\tilde{\nu}$  [cm<sup>-1</sup>] = 2956, 2922, 2890, 1723, 1668, 1605, 1345, 1167, 927, 740.

$[\alpha]^{24}_D$  = - 15 (*c* = 1.0, CHCl<sub>3</sub>).

**<sup>1</sup>H NMR** (500 MHz, CDCl<sub>3</sub>):  $\delta$  9.67 (*virt. t*, *J* = 1.4 Hz, 1H), 8.04 (d, *J* = 8.3 Hz, 2H), 7.24 (d, *J* = 8.0 Hz, 2H), 4.04 (d, *J* = 5.7 Hz, 1H), 3.96 (d, *J* = 5.7 Hz, 1H), 2.79 (ddd, *J* = 8.4, 3.4, 1.1 Hz, 1H), 2.74 (d, *J* = 3.4 Hz, 1H), 2.49 – 2.31 (m, 6H), 2.02 – 1.89 (m, 2H), 1.85 (*virt. t*, *J* = 8.0 Hz, 1H).

**<sup>13</sup>C NMR** (101 MHz, CDCl<sub>3</sub>):  $\delta$  201.6, 195.3, 144.6, 133.1, 129.7 (2C), 129.3 (2C), 93.1, 71.2, 58.6, 42.8, 40.2, 38.6, 21.9, 19.3.

**HRMS (ESI):** calculated for C<sub>16</sub>H<sub>19</sub>O<sub>3</sub><sup>+</sup>, [M+H]<sup>+</sup> = 259.1329; found = 259.1331.

#### (3*S*,3*aR*,8*aS*)-hexahydro-7*H*-3,8*a*-methanofuro[2,3-*b*]oxepin-7-one (**14**)

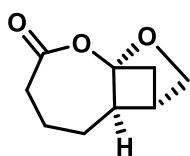

To a stirring solution of 45.7 mg (0.300 mmol) of **5a** (*ee* of the sample = 92%) in anhydrous CH<sub>2</sub>Cl<sub>2</sub> (3.0 mL) 202 mg of *m*-CPBA (77%, 3.00 equiv.) were added. The reaction mixture was stirred overnight at room temperature until full conversion as judged by TLC (10% EtOAc in

CH<sub>2</sub>Cl<sub>2</sub>). The reaction mixture was subsequently washed with a 10% solution of Na<sub>2</sub>SO<sub>3</sub>, a saturated solution of NaHCO<sub>3</sub> and brine, before being dried over Na<sub>2</sub>SO<sub>4</sub>. After removal of the solvent at reduced pressure the residue was purified by flash chromatography on silica gel (50% EtOAc in hexanes) to obtain 13.1 mg of the desired product **14** as a white solid (26% yield).

$R_f$  = 0.45 (10% EtOAc in CH<sub>2</sub>Cl<sub>2</sub>).

**IR:**  $\tilde{\nu}$  [cm<sup>-1</sup>] = 2920, 1775, 1736, 1238, 1170, 1044, 911.

**mp** = 70-80 °C

$[\alpha]^{24}_D$  = + 26 (*c* = 0.50, CHCl<sub>3</sub>).

**<sup>1</sup>H NMR** (400 MHz, CDCl<sub>3</sub>):  $\delta$  3.84 (s, 2H), 2.85 (dddd, *J* = 14.8, 9.2, 2.3, 0.9 Hz, 1H), 2.65 (dd, *J* = 7.9, 3.7 Hz, 1H), 2.61 – 2.49 (m, 3H), 2.17 – 2.08 (m, 1H), 2.05 (*virt. t*, *J* = 7.7 Hz, 1H), 2.00 – 1.90 (m, 1H), 1.86 – 1.73 (m, 1H), 1.69 – 1.57 (m, 1H).

**<sup>13</sup>C NMR** (101 MHz, CDCl<sub>3</sub>):  $\delta$  170.4, 105.7, 69.8, 55.3, 40.5, 36.4, 36.1, 25.6, 21.9.

**HRMS (ESI):** calculated for C<sub>9</sub>H<sub>12</sub>NaO<sub>3</sub><sup>+</sup>, [M+Na]<sup>+</sup> = 191.0679; found = 191.0678.

#### 4-Bromobenzyl 4-[(1*R*,2*S*)-2-(hydroxymethyl)-4-oxocyclobutyl]butanoate (**15**)

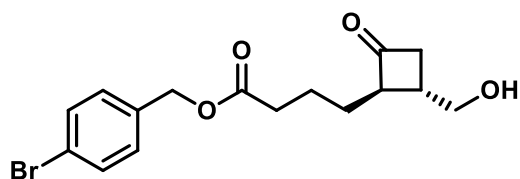

12.2 mg (72.6  $\mu\text{mol}$ ) of **14** were dissolved in  $\text{CH}_2\text{Cl}_2$  (0.73 mL), then 1.8 mg (0.20 equiv.) of DMAP, 67.8 mg (5.00 equiv.) of 4-bromobenzyl alcohol and 30.0  $\mu\text{L}$  (3.00 equiv.) of triethylamine were added. After overnight stirring the solvent was removed and the residue was purified by flash chromatography on silica gel (from 10 to 50% EtOAc in hexanes) to obtain 15.6 mg of the desired product **15** as a colourless oil (60% yield). The enantiomeric excess (92% *ee*) was determined by normal phase HPLC on a *Daicel Chiralpak AS-H* column [ $\tau_{\text{major}} = 34.8$  min,  $\tau_{\text{minor}} = 39.2$  min; flow rate 1.0 mL/min; *i*-PrOH:*n*-heptane = 10:90;  $\lambda = 210$  nm].

$R_f = 0.22$  (50% EtOAc in hexanes).

**IR:**  $\tilde{\nu}$  [ $\text{cm}^{-1}$ ] = 3456, 2925, 2856, 1773, 1734, 1490, 1352, 1071, 1013, 802.

$[\alpha]^{24}_{\text{D}} = +18$  ( $c = 0.50$ ,  $\text{CHCl}_3$ ).

**$^1\text{H}$  NMR** (400 MHz,  $\text{CDCl}_3$ ):  $\delta$  7.51 – 7.45 (m, 2H), 7.24 – 7.19 (m, 2H), 5.05 (s, 2H), 3.87 – 3.75 (m, 2H), 3.07 – 3.00 (m, 1H), 2.96 (ddd,  $J = 17.3, 8.6, 2.4$  Hz, 1H), 2.83 (ddd,  $J = 17.3, 7.4, 2.9$  Hz, 1H), 2.41 – 2.33 (m, 2H), 2.29 – 2.19 (m, 1H), 1.85 (br s, 1H), 1.81 – 1.64 (m, 3H), 1.63 – 1.47 (m, 1H).

**$^{13}\text{C}$  NMR** (101 MHz,  $\text{CDCl}_3$ ):  $\delta$  209.2, 173.3, 135.1, 131.9 (2C), 130.1 (2C), 122.4, 65.6, 65.5, 62.0, 46.8, 34.0, 33.2, 28.4, 22.6.

**HRMS (ESI):** calculated for  $\text{C}_{16}\text{H}_{20}\text{BrO}_4^+$ ,  $[\text{M}+\text{H}]^+ = 355.0539$ ; found = 355.0540.



## 10. NMR Spectra

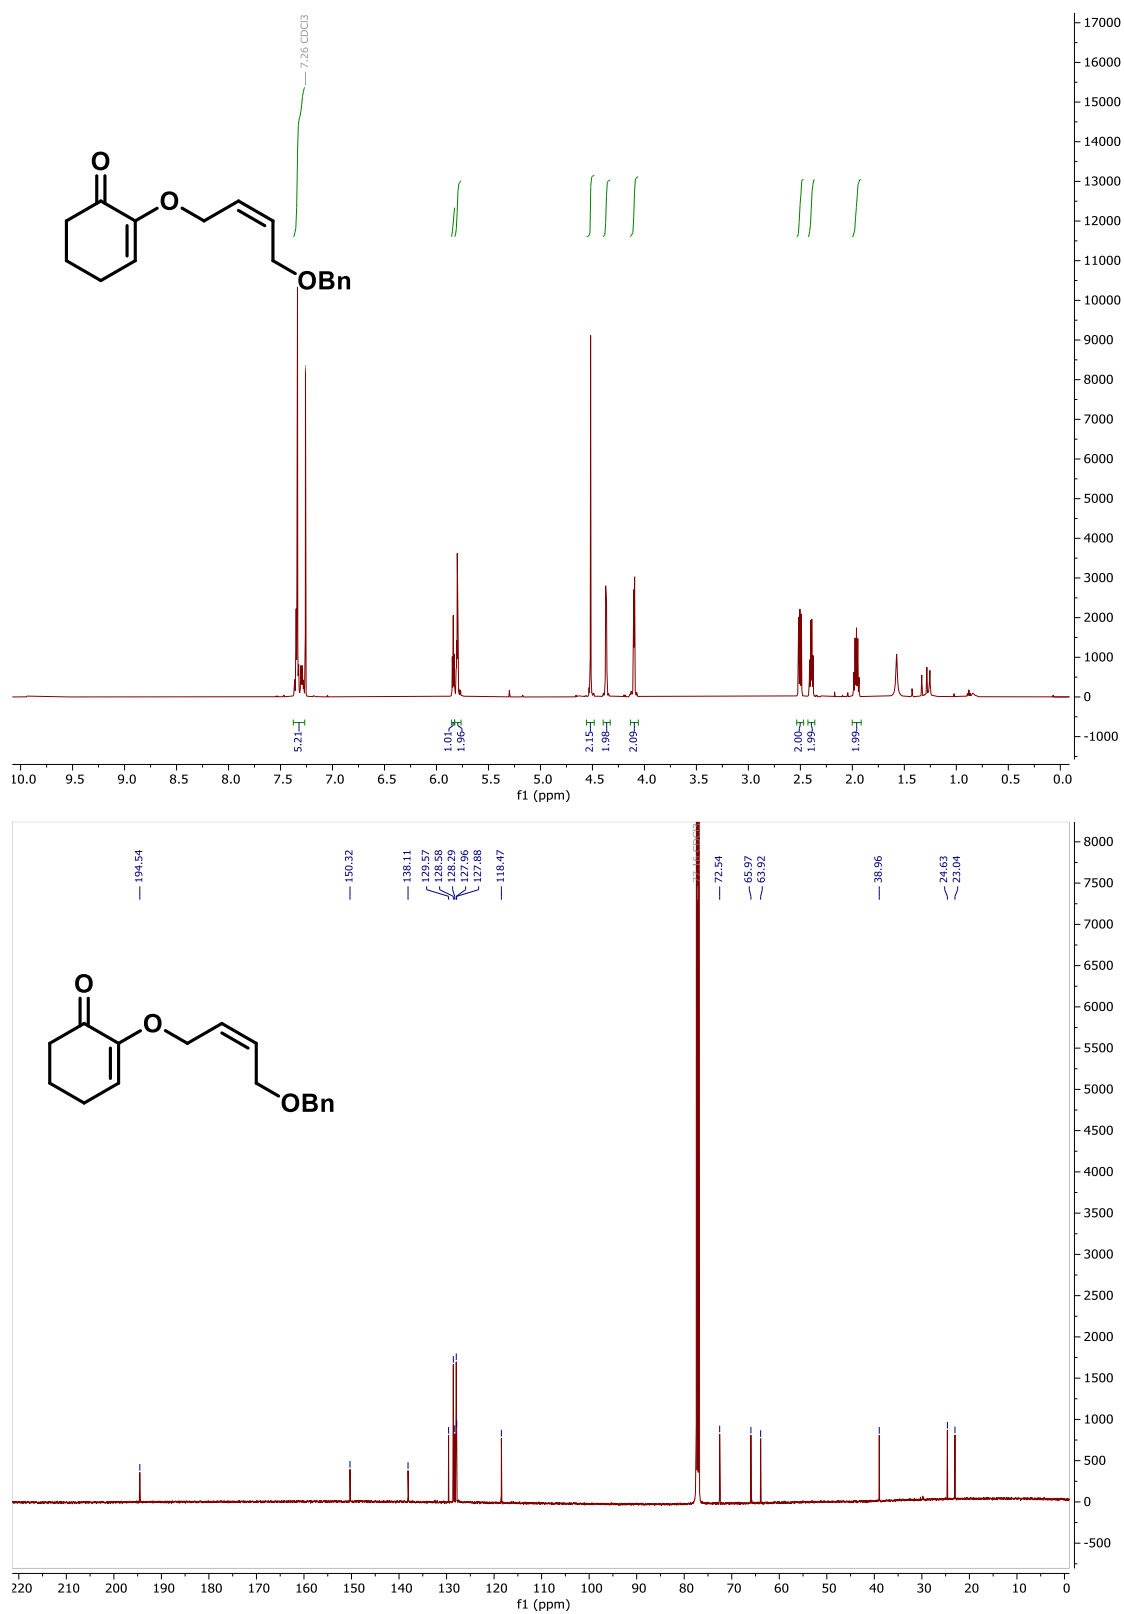

Figure S2:  $^1\text{H}$  and  $^{13}\text{C}$  NMR spectra for compound **4d** (500 and 126 MHz,  $\text{CDCl}_3$ , 300K).

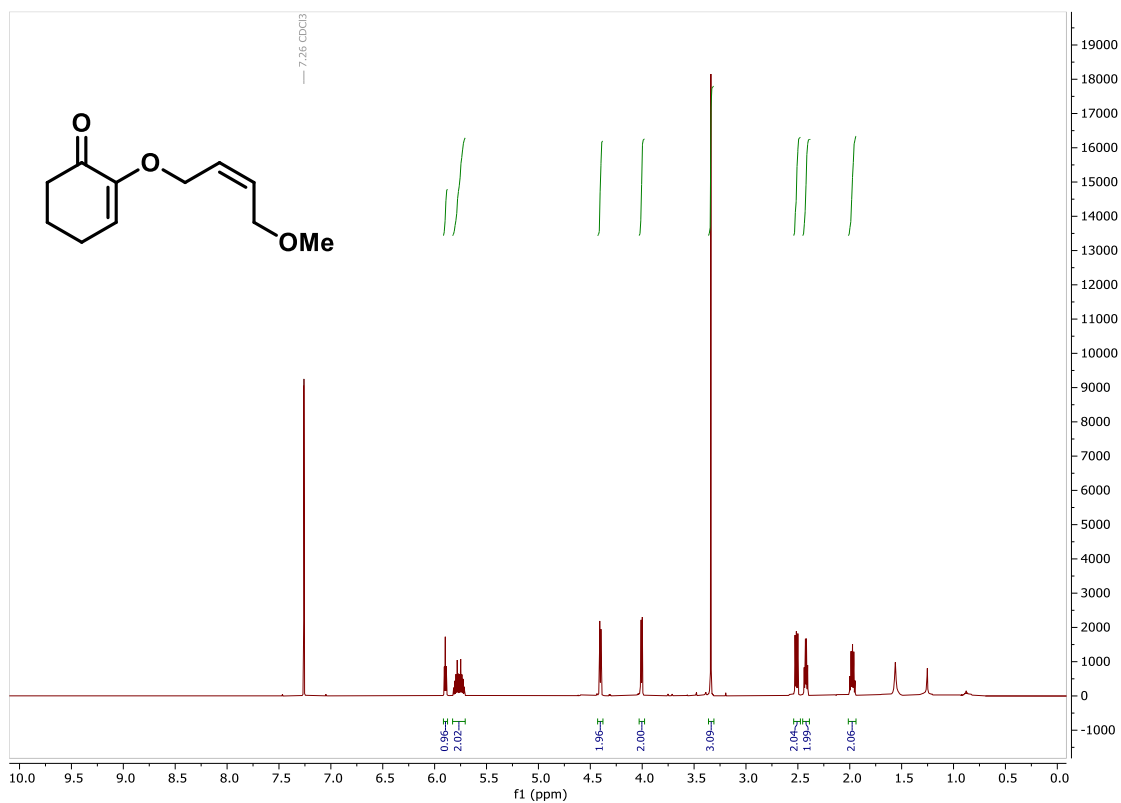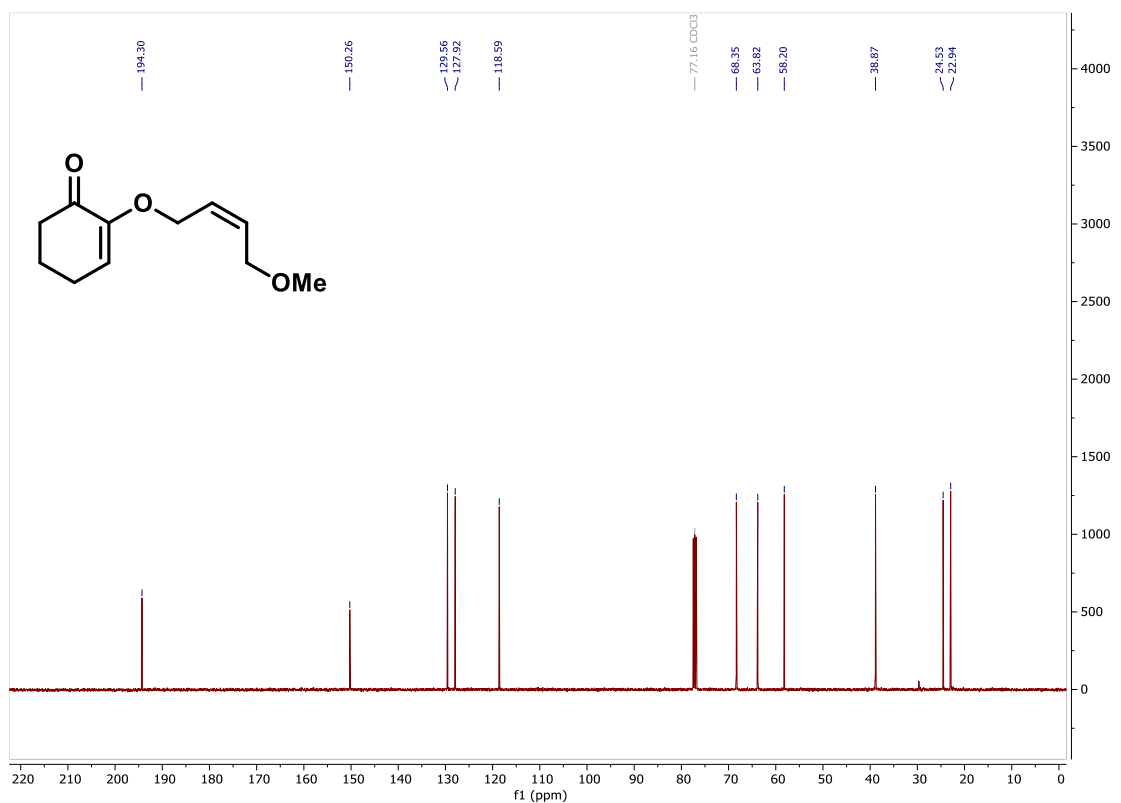

Figure S3: <sup>1</sup>H and <sup>13</sup>C NMR spectra for compound **4e** (500 and 101 MHz, CDCl<sub>3</sub>, 300K).

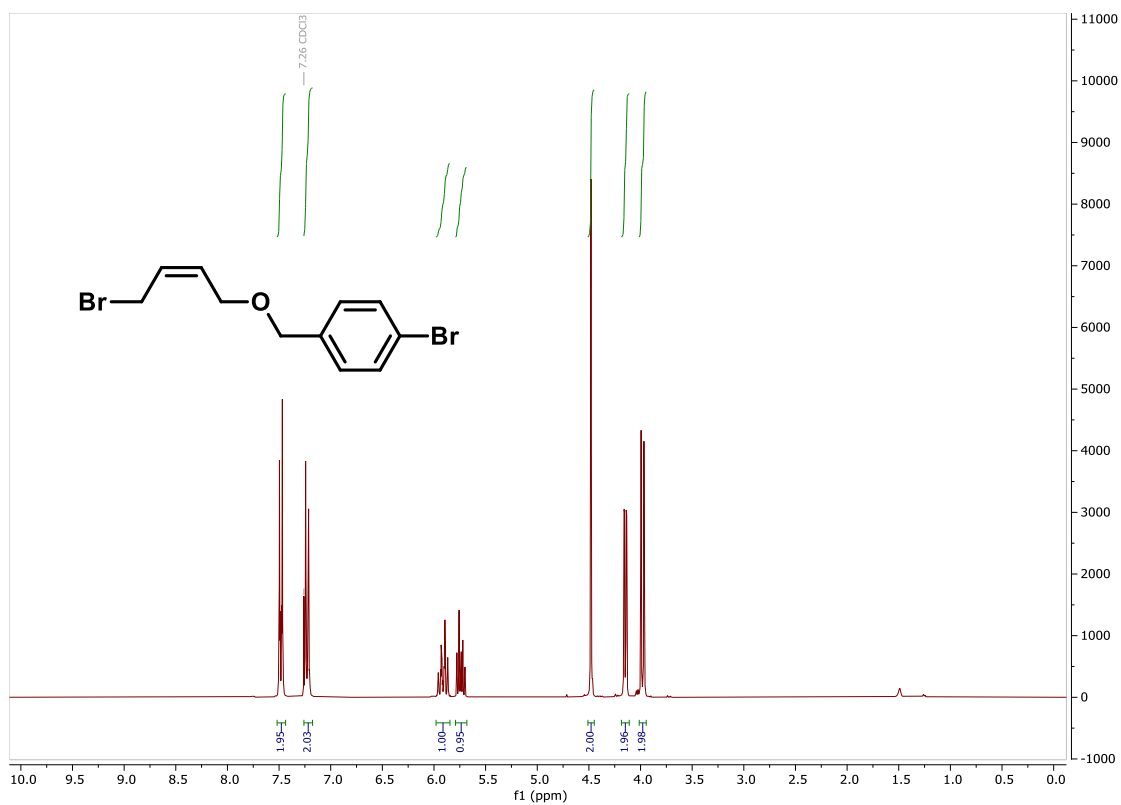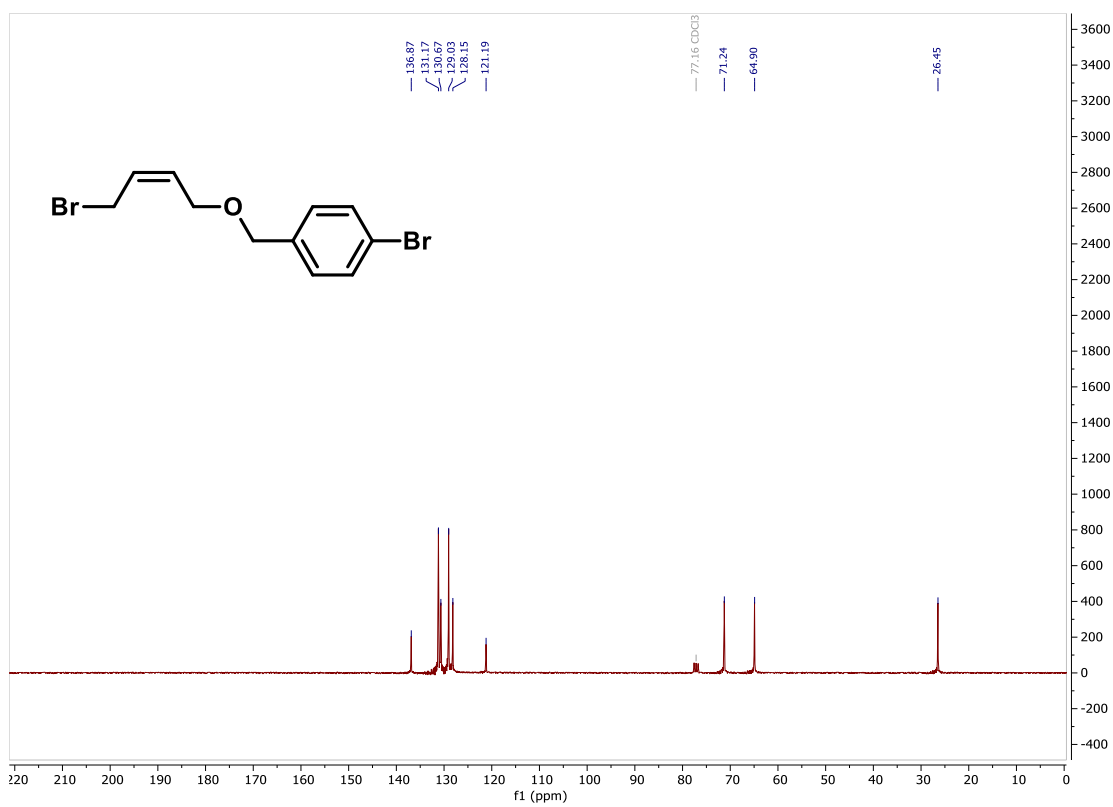

Figure S4: <sup>1</sup>H and <sup>13</sup>C NMR spectra for compound S5 (300 and 75 MHz, CDCl<sub>3</sub>, 300K).

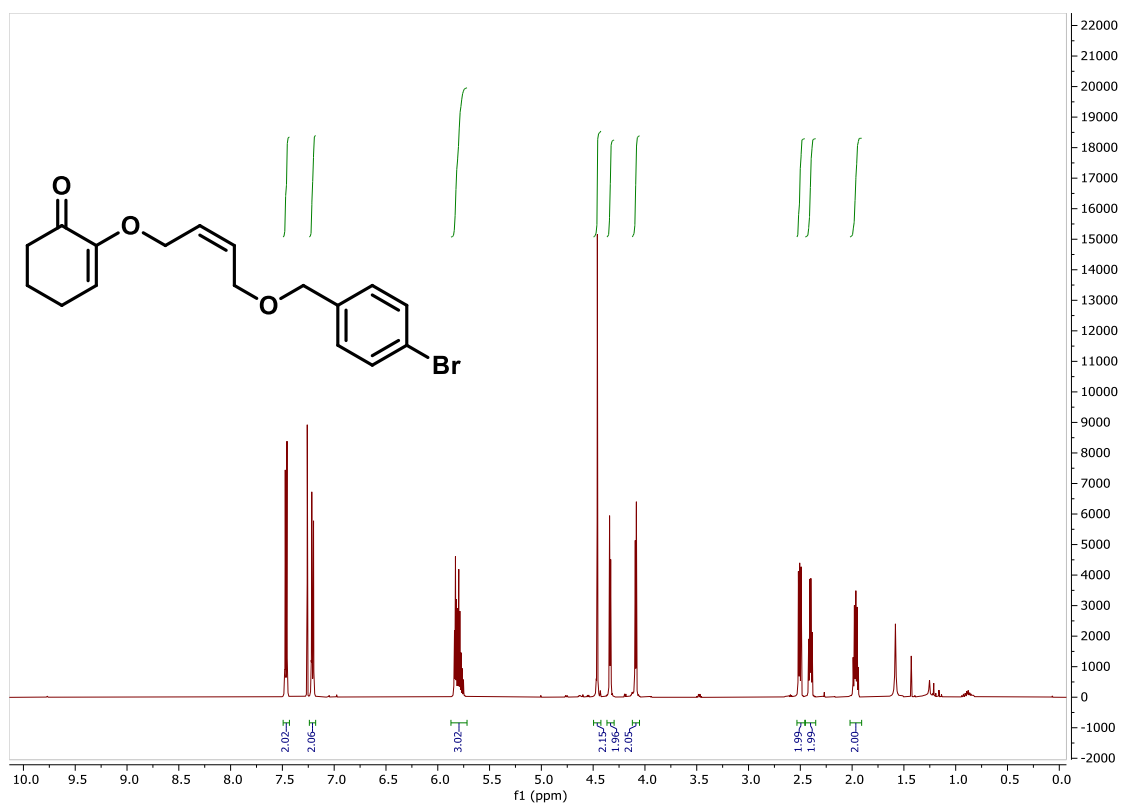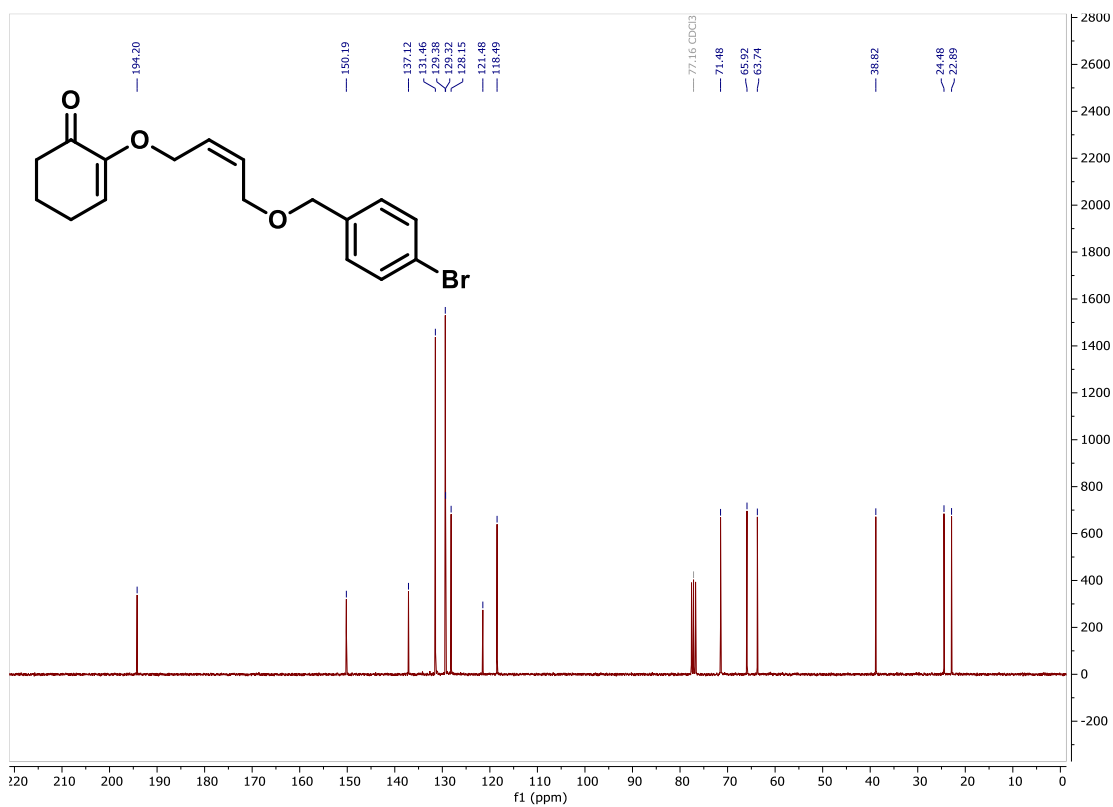

Figure S5: <sup>1</sup>H and <sup>13</sup>C NMR spectra for compound 4f (500 and 75 MHz, CDCl<sub>3</sub>, 300K).

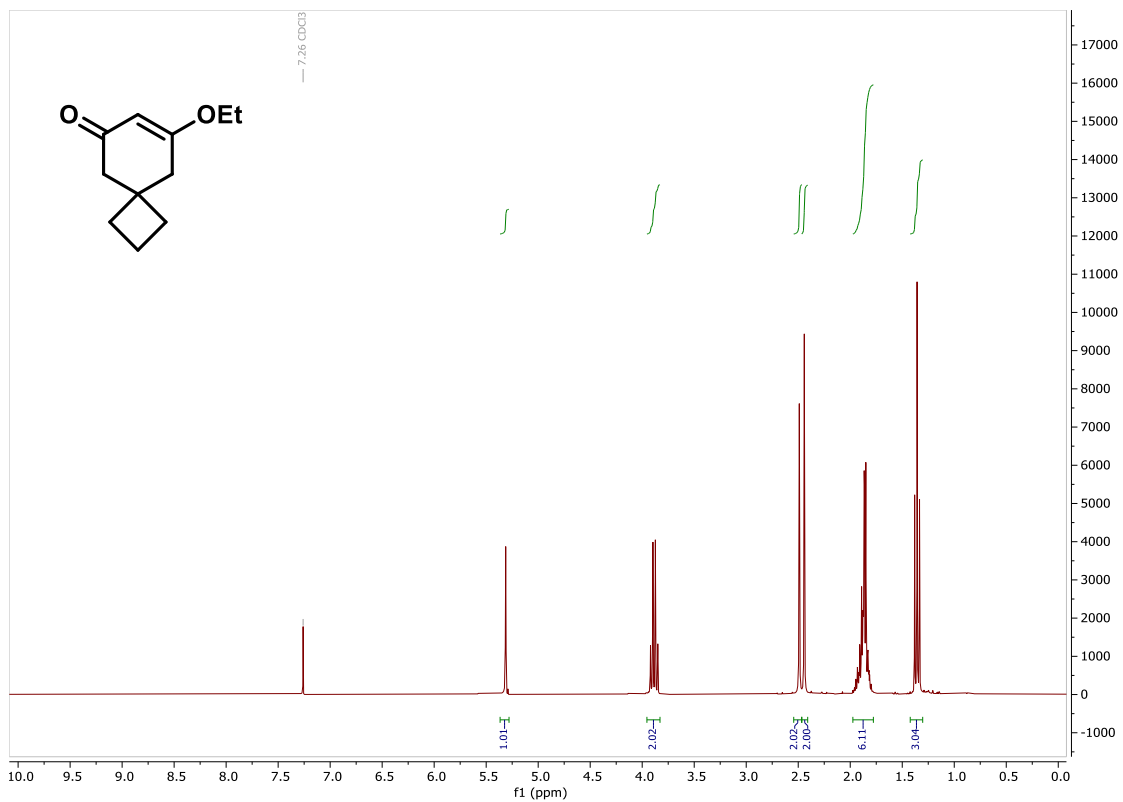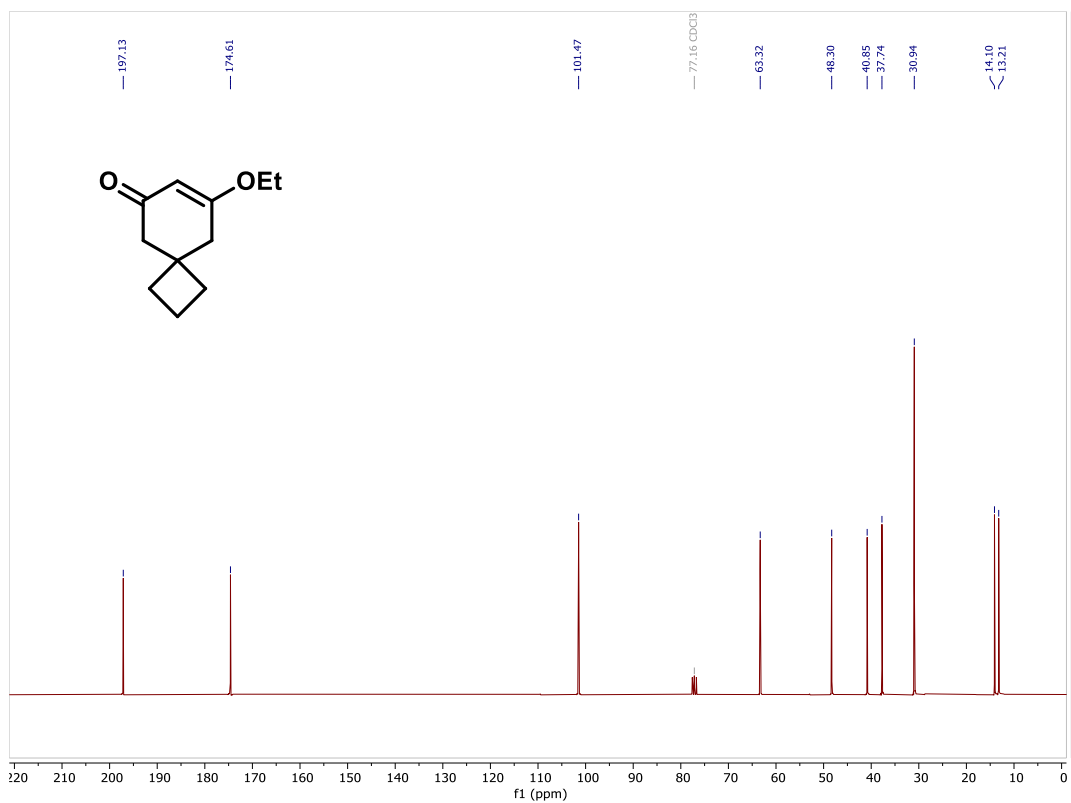

**Figure S6:** <sup>1</sup>H and <sup>13</sup>C NMR spectra for compound **S8** (300 and 75 MHz, CDCl<sub>3</sub>, 300K).

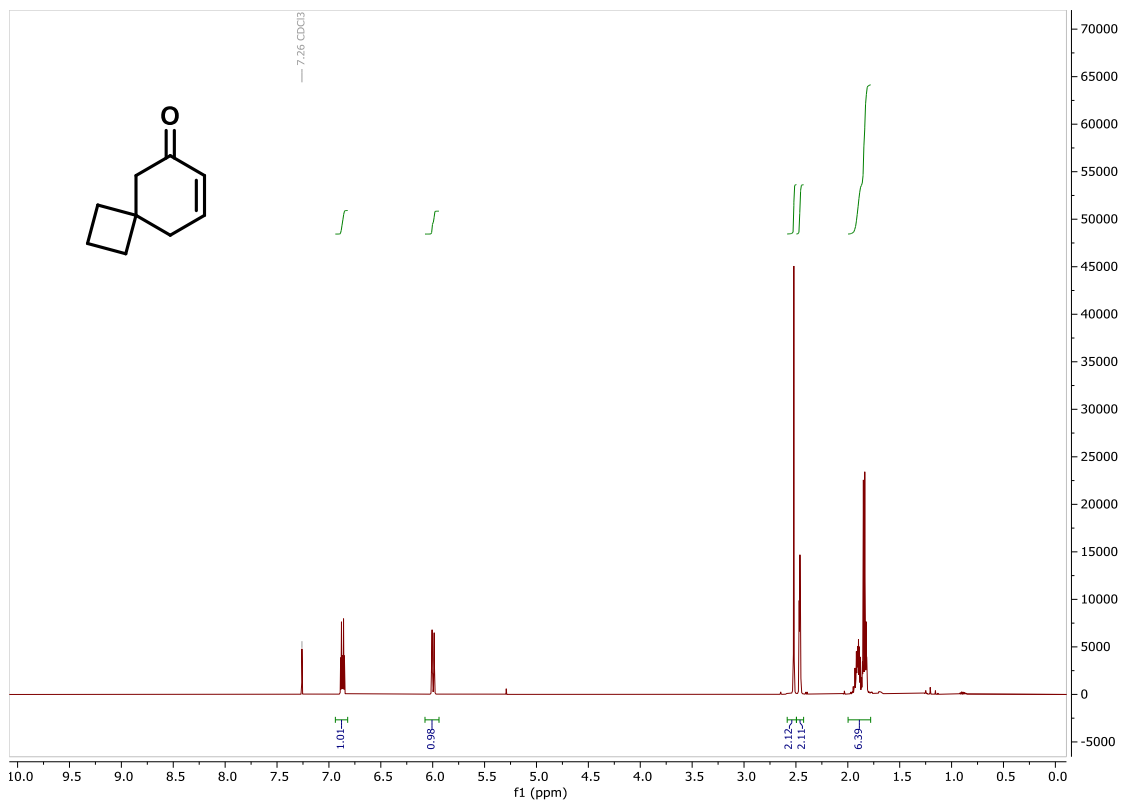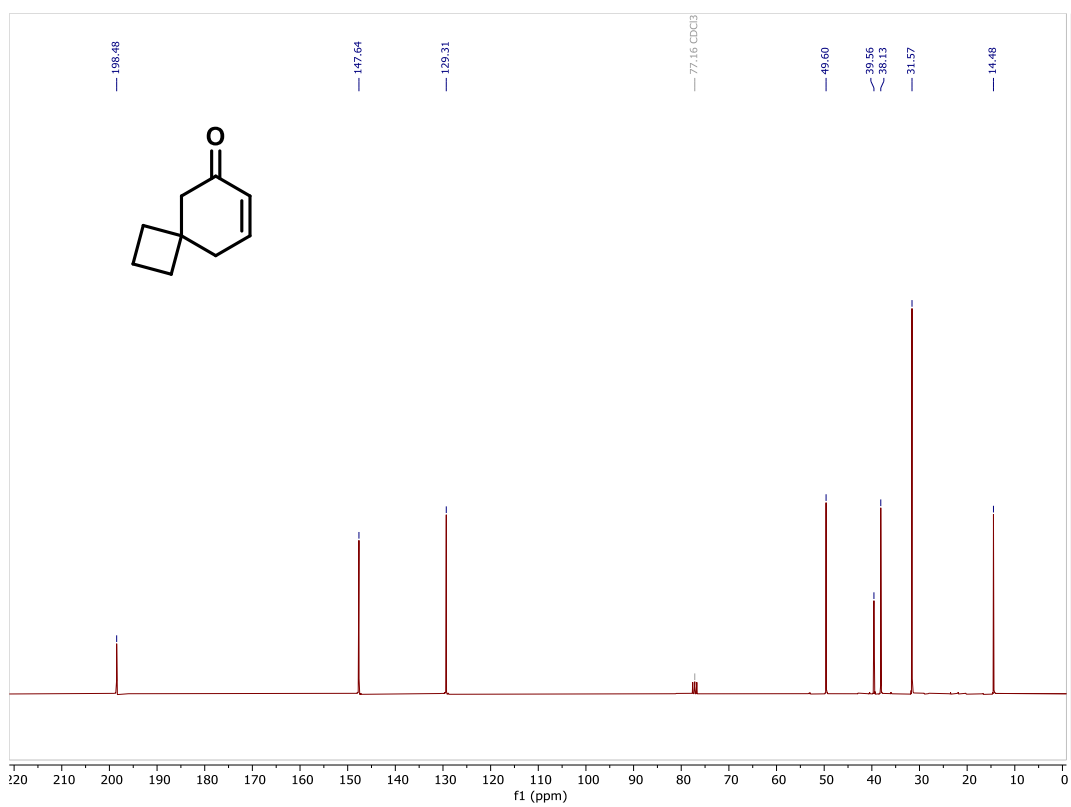

**Figure S7:** <sup>1</sup>H and <sup>13</sup>C NMR spectra for compound **S9** (500 and 75 MHz, CDCl<sub>3</sub>, 300K).

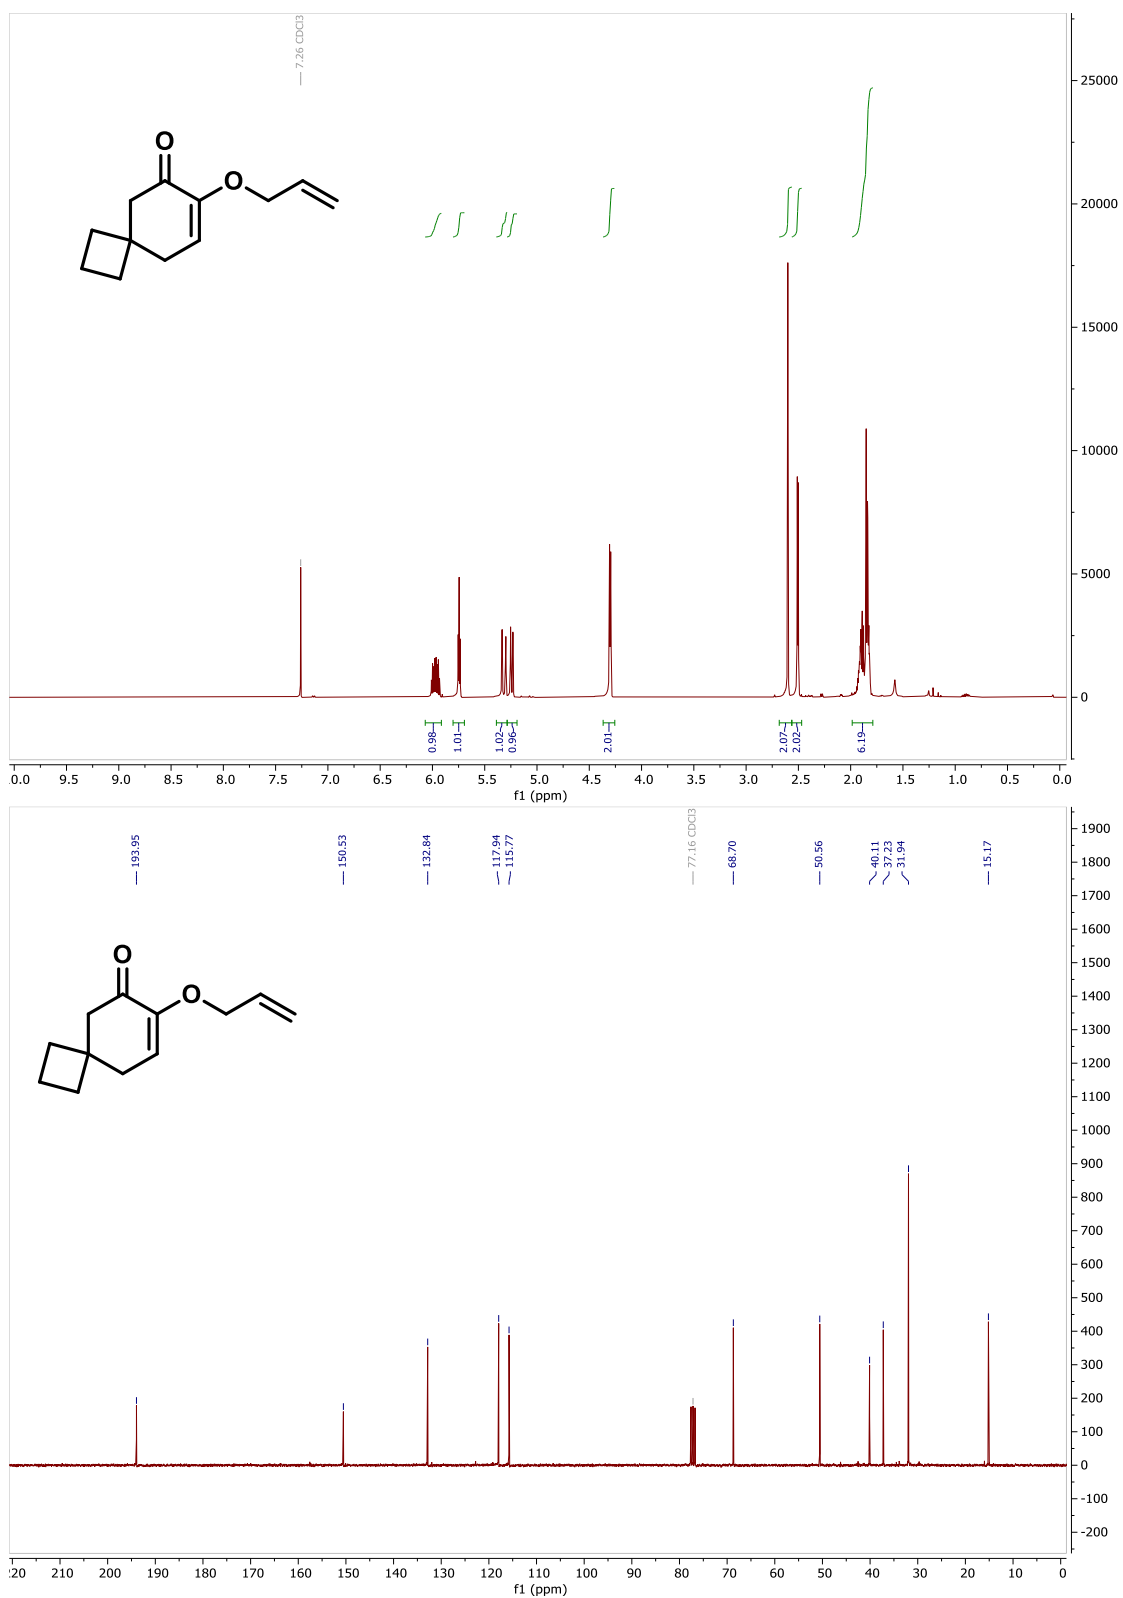

Figure S8:  $^1\text{H}$  and  $^{13}\text{C}$  NMR spectra for compound **4h** (500 and 75 MHz,  $\text{CDCl}_3$ , 300K).

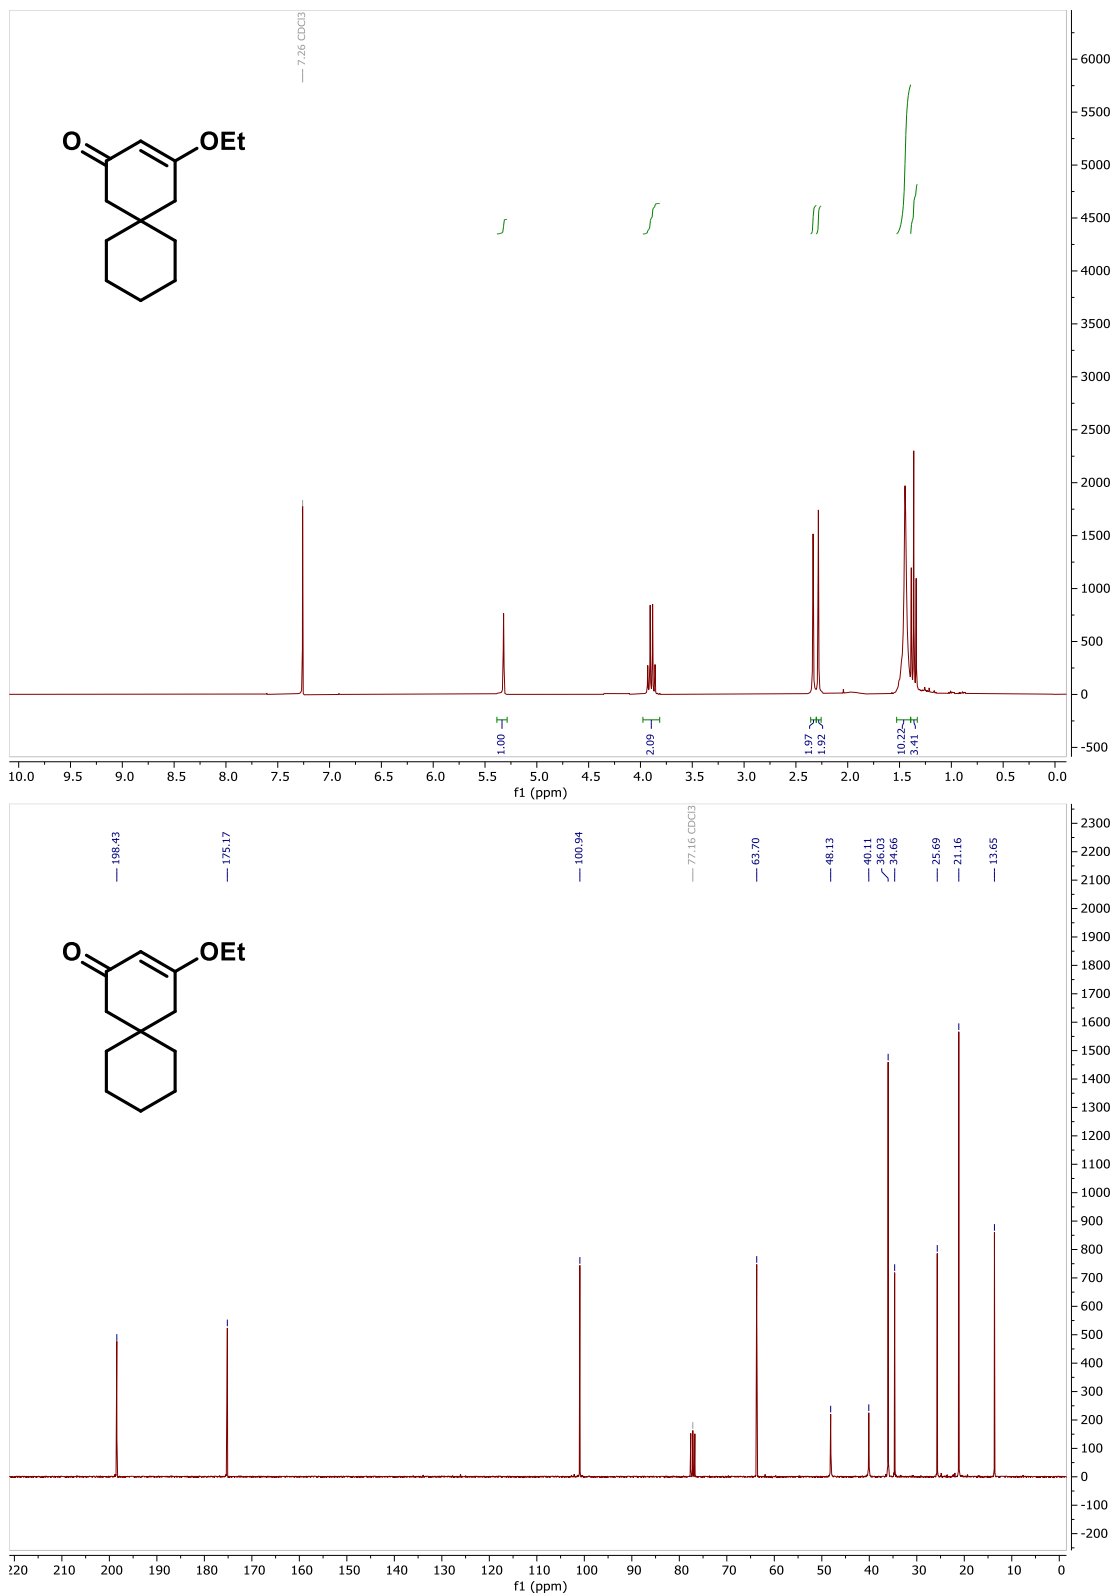

**Figure S9:** <sup>1</sup>H and <sup>13</sup>C NMR spectra for compound S12 (300 and 75 MHz, CDCl<sub>3</sub>, 300K).



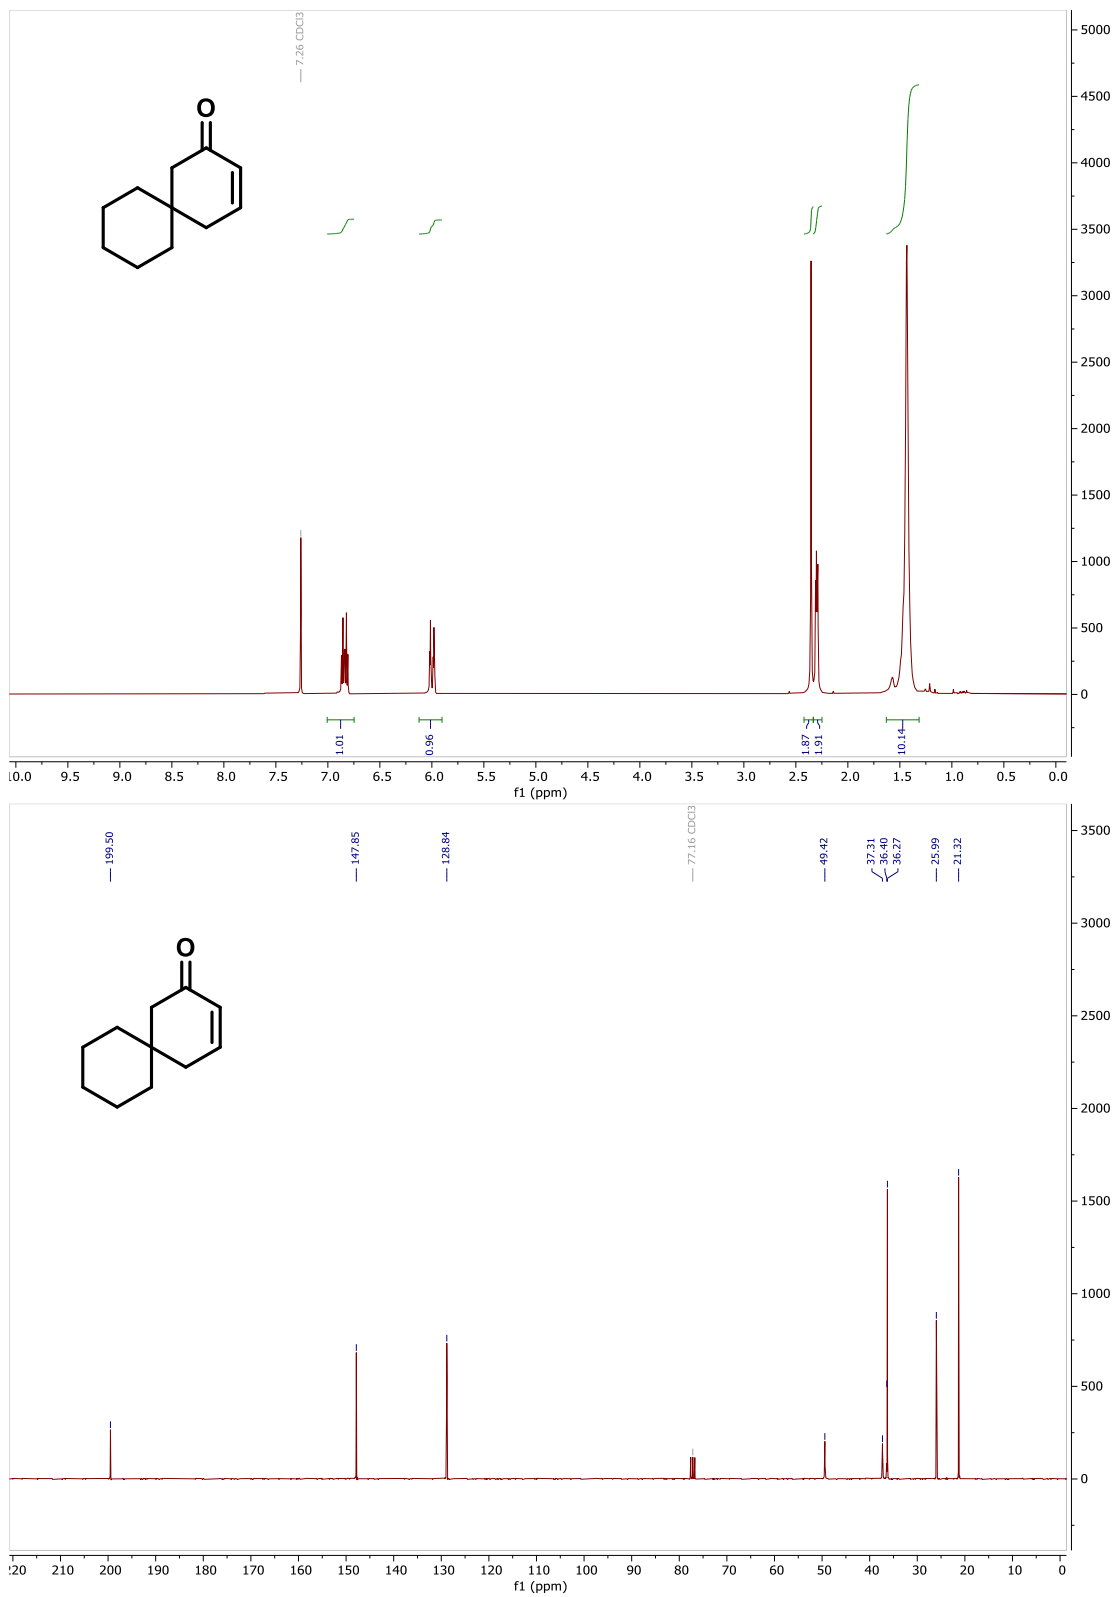

**Figure S10:**  $^1\text{H}$  and  $^{13}\text{C}$  NMR spectra for compound **S13** (300 and 75 MHz,  $\text{CDCl}_3$ , 300K).

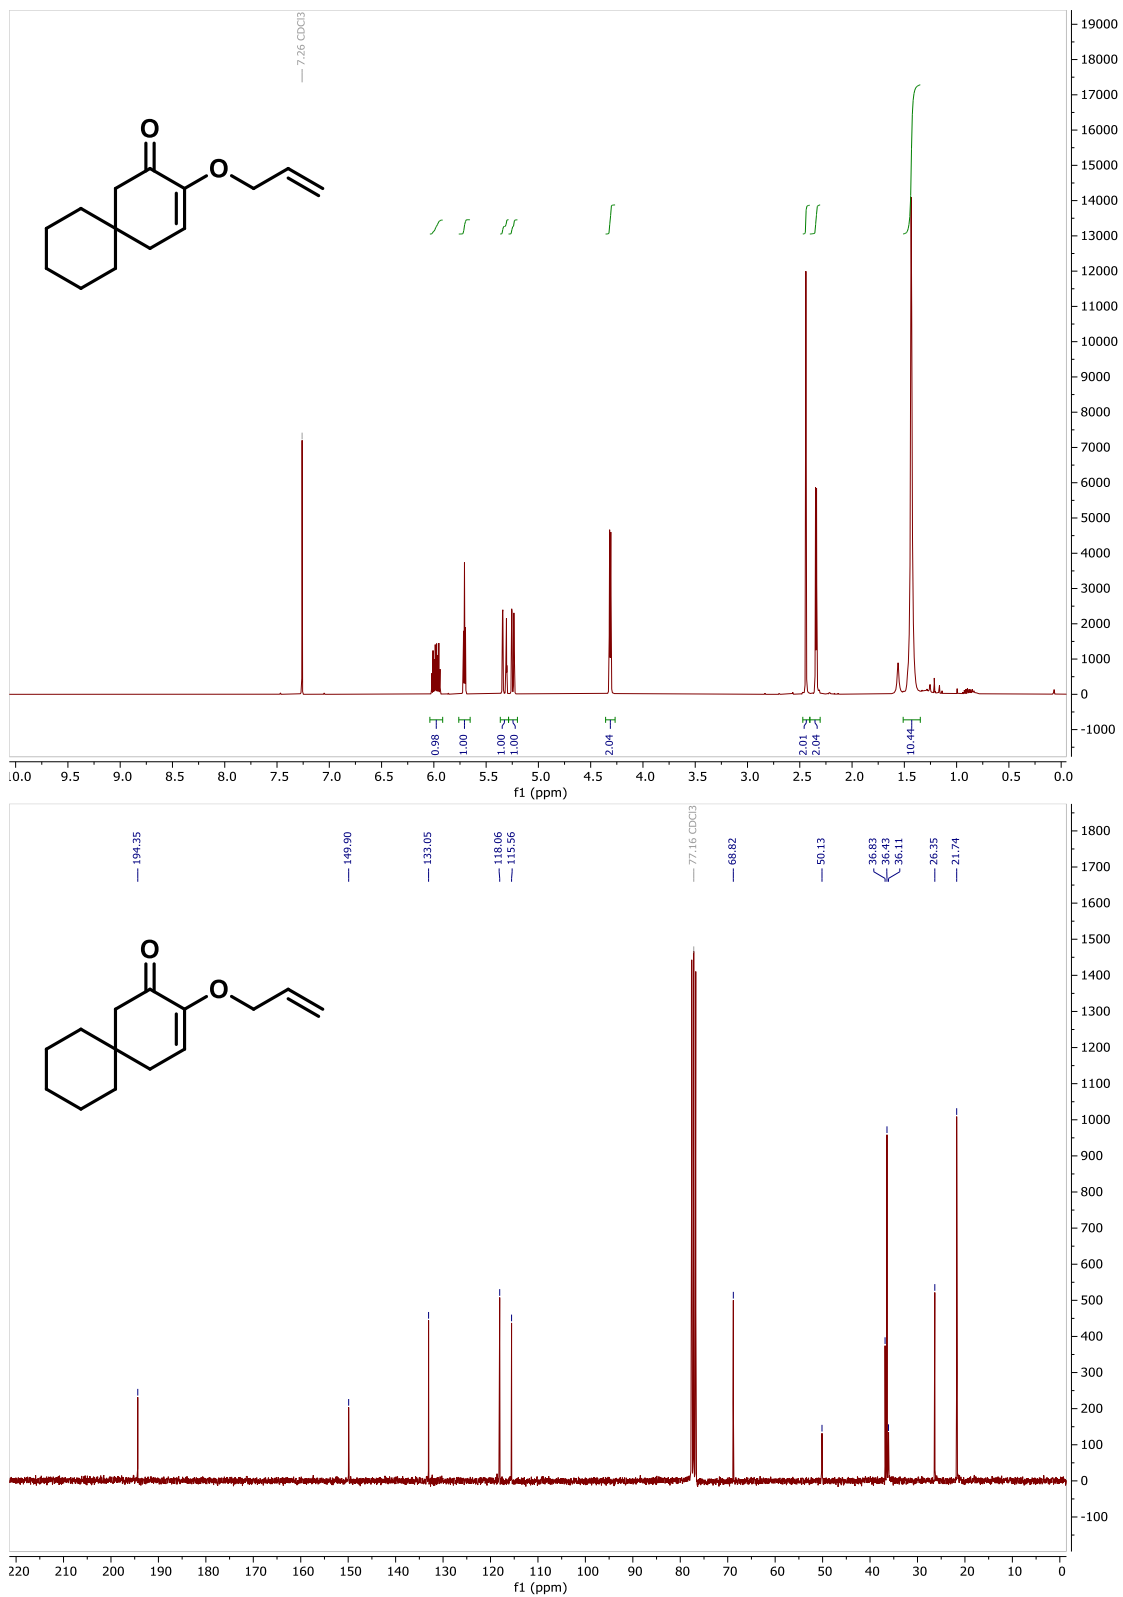

Figure S11:  $^1\text{H}$  and  $^{13}\text{C}$  NMR spectra for compound **4i** (500 and 75 MHz,  $\text{CDCl}_3$ , 300K).

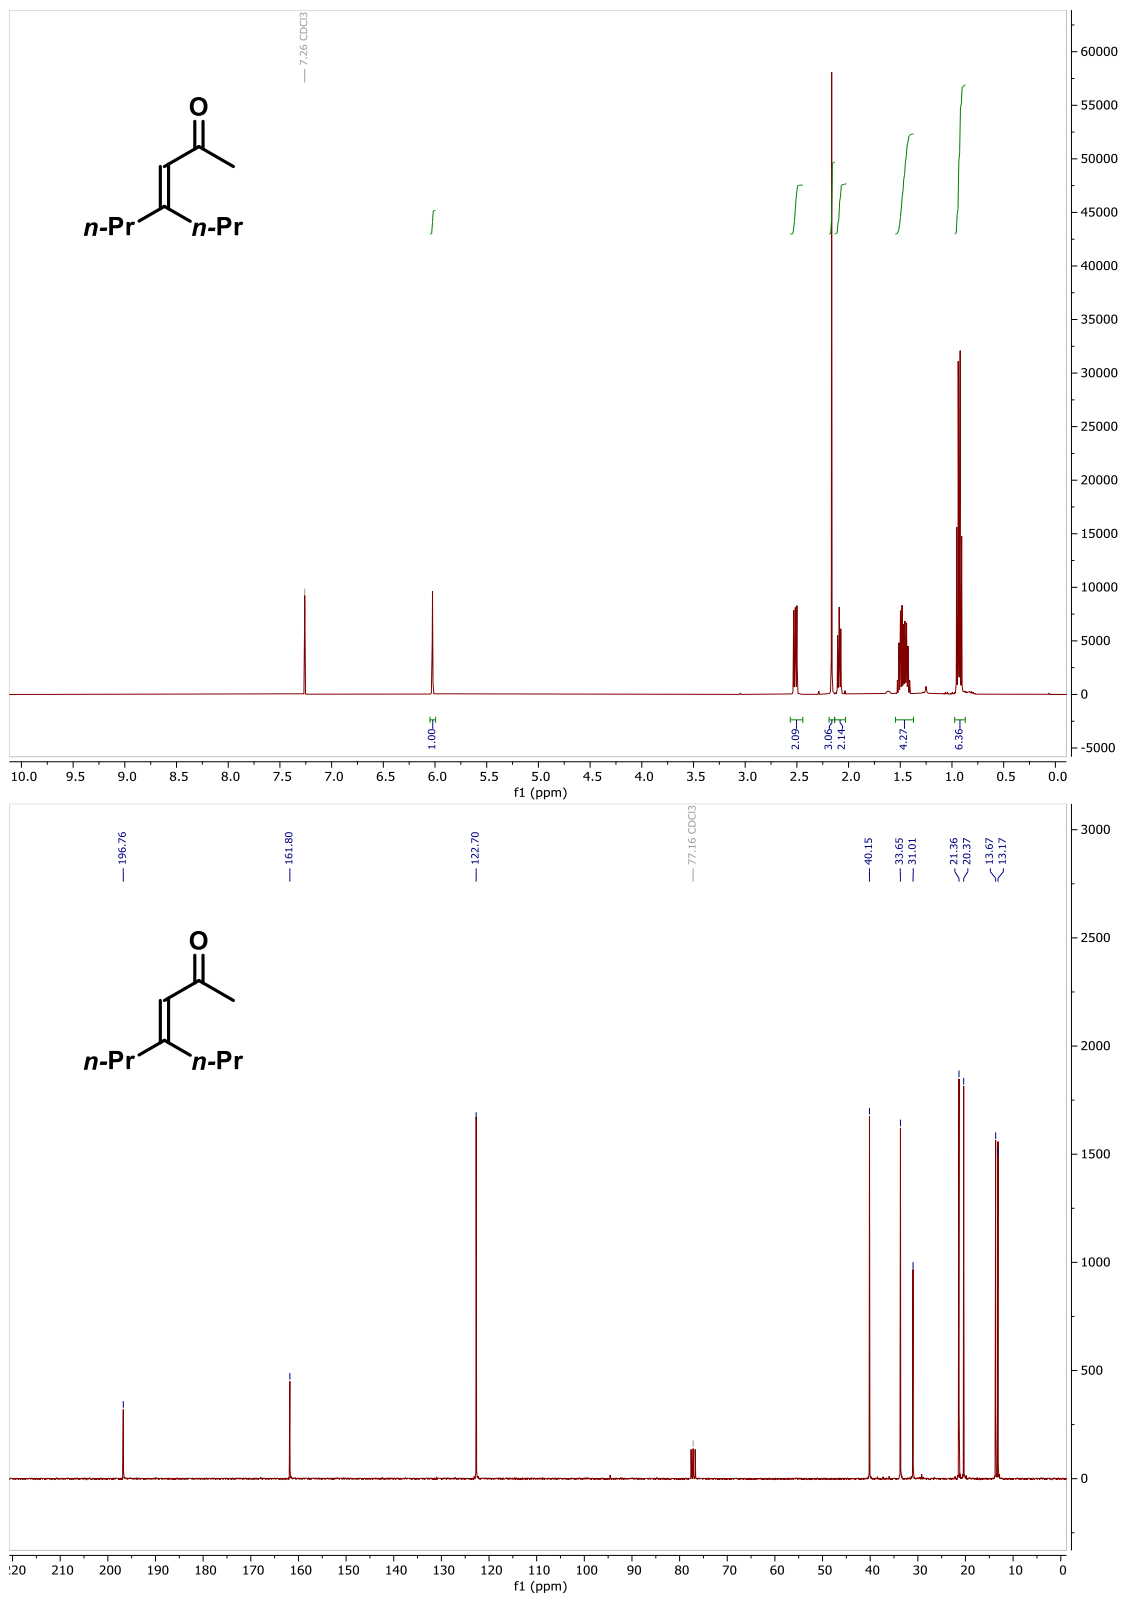

**Figure S12:** <sup>1</sup>H and <sup>13</sup>C NMR spectra for compound **S15** (500 and 75 MHz, CDCl<sub>3</sub>, 300K).

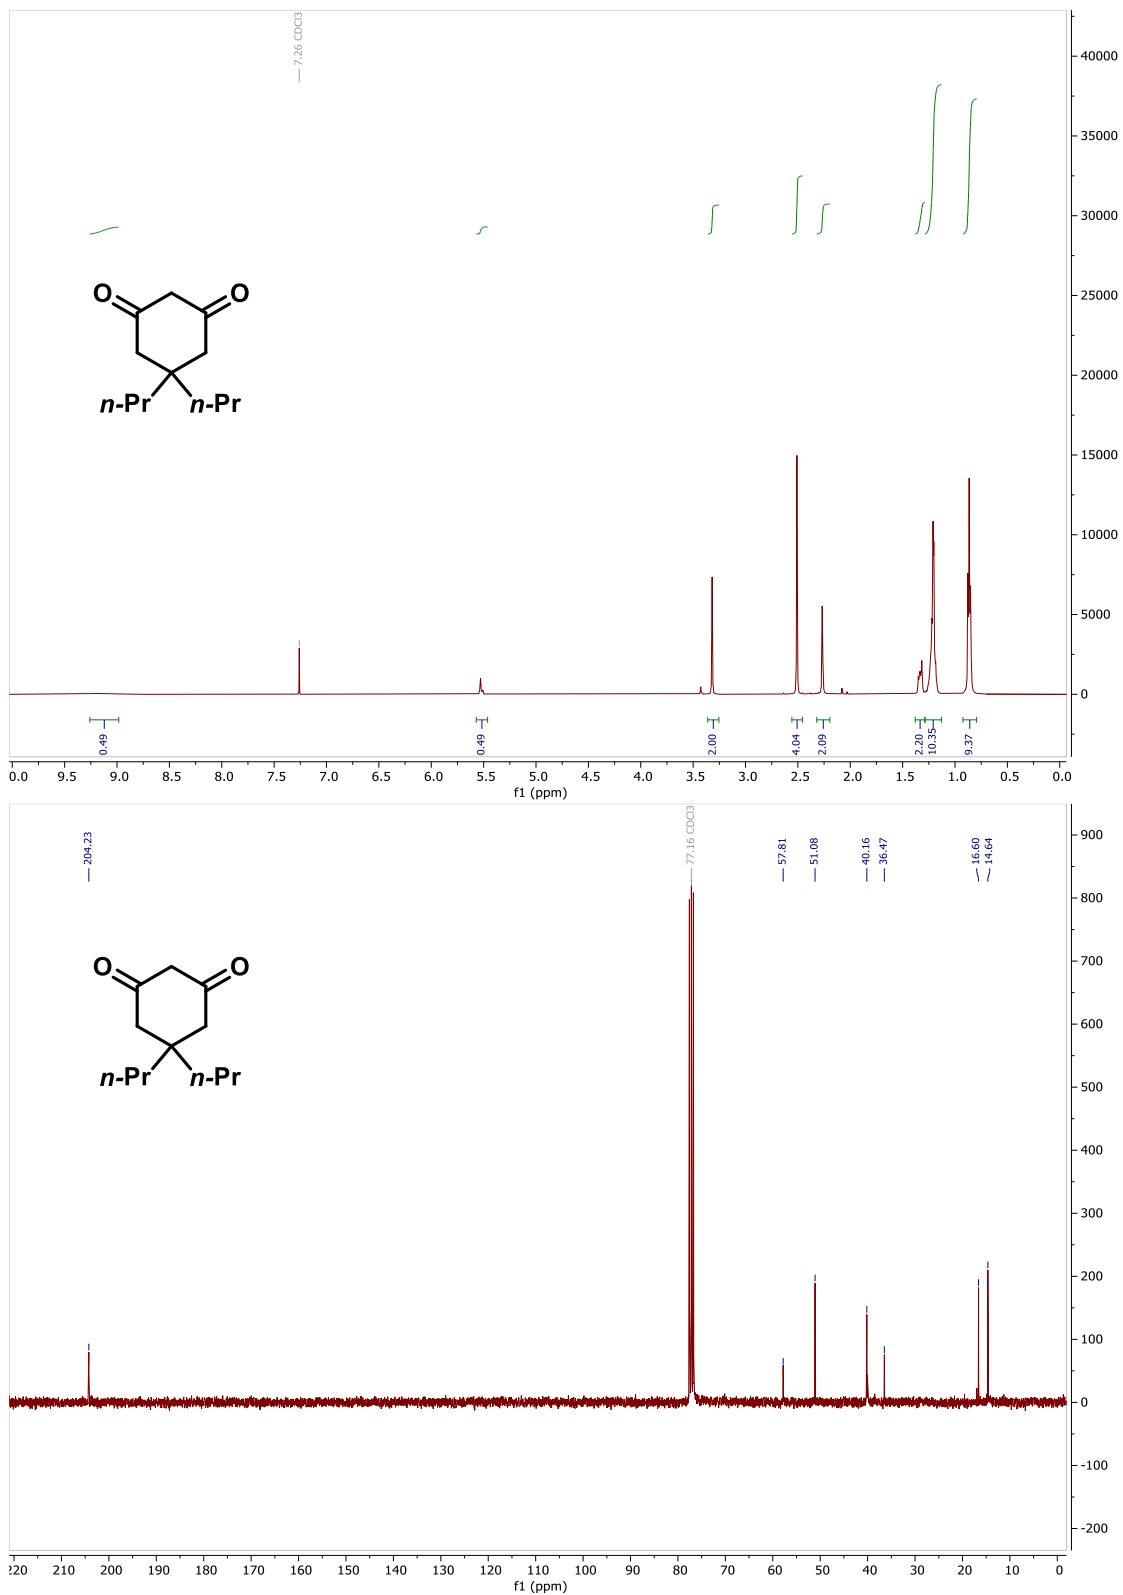

**Figure S13:** <sup>1</sup>H and <sup>13</sup>C NMR spectra for compound **S16** (500 and 75 MHz, CDCl<sub>3</sub>, 300K).

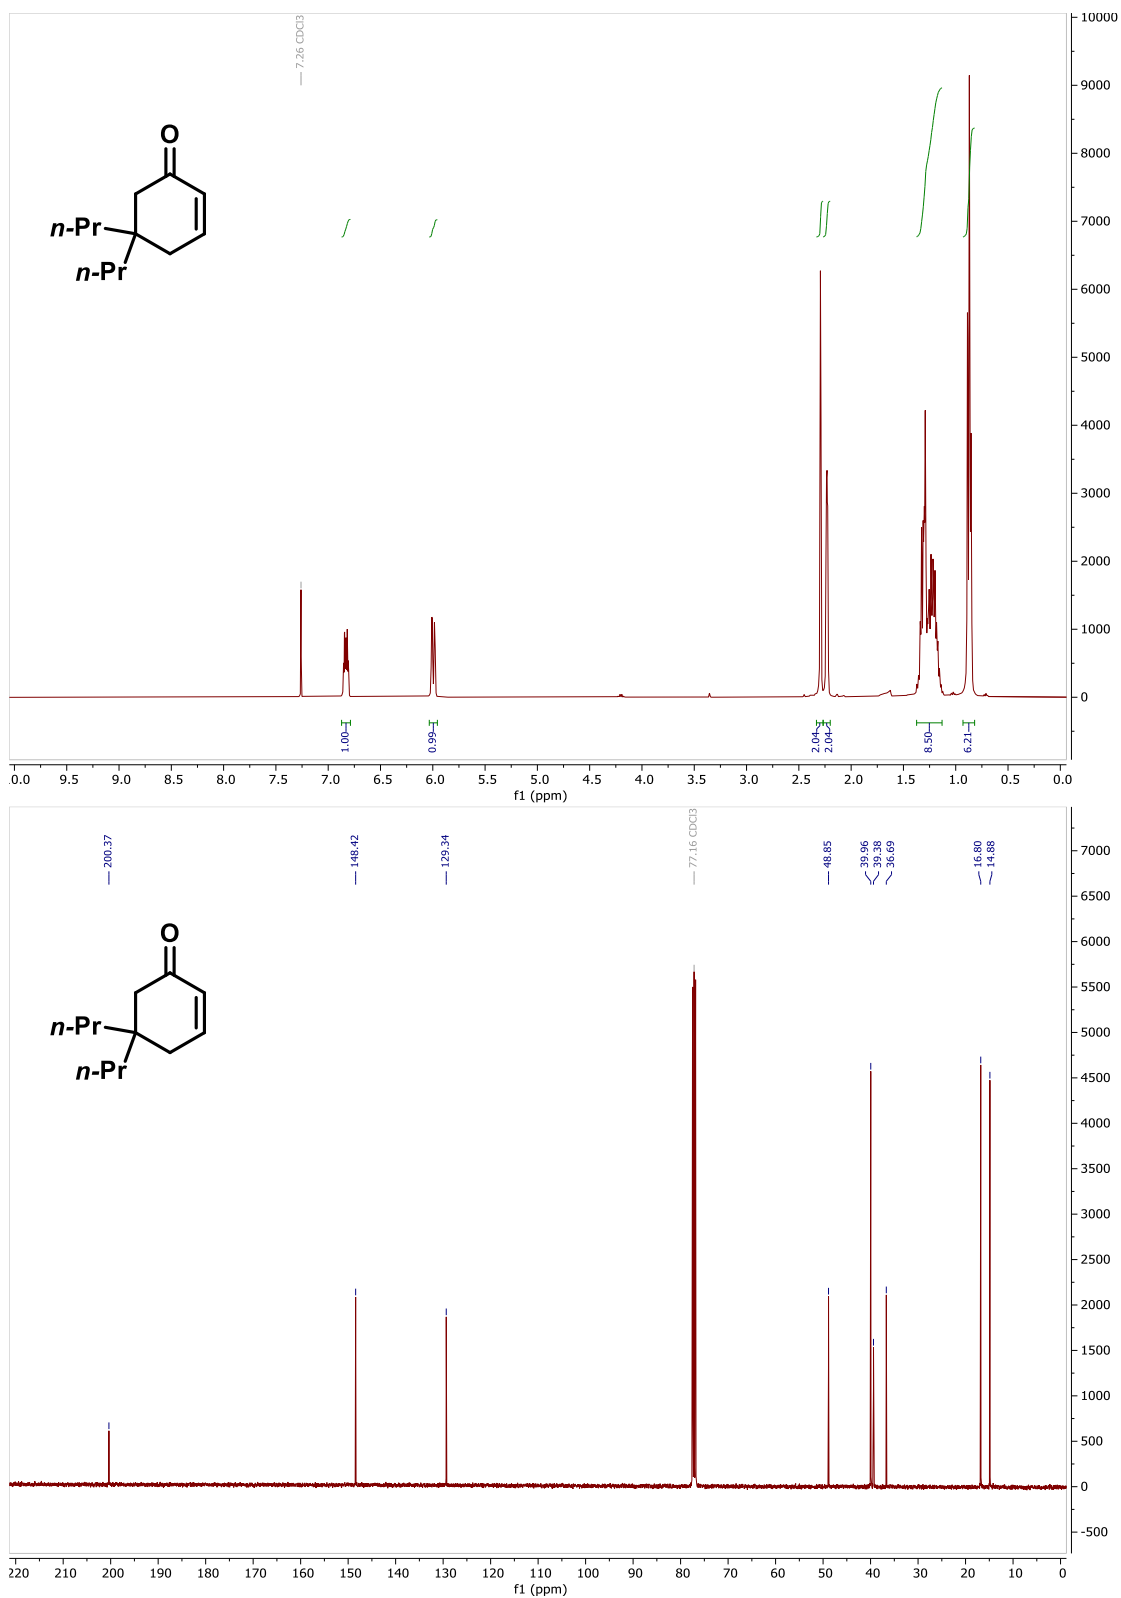

**Figure S14:** <sup>1</sup>H and <sup>13</sup>C NMR spectra for compound **S17** (400 and 101 MHz, CDCl<sub>3</sub>, 300K).

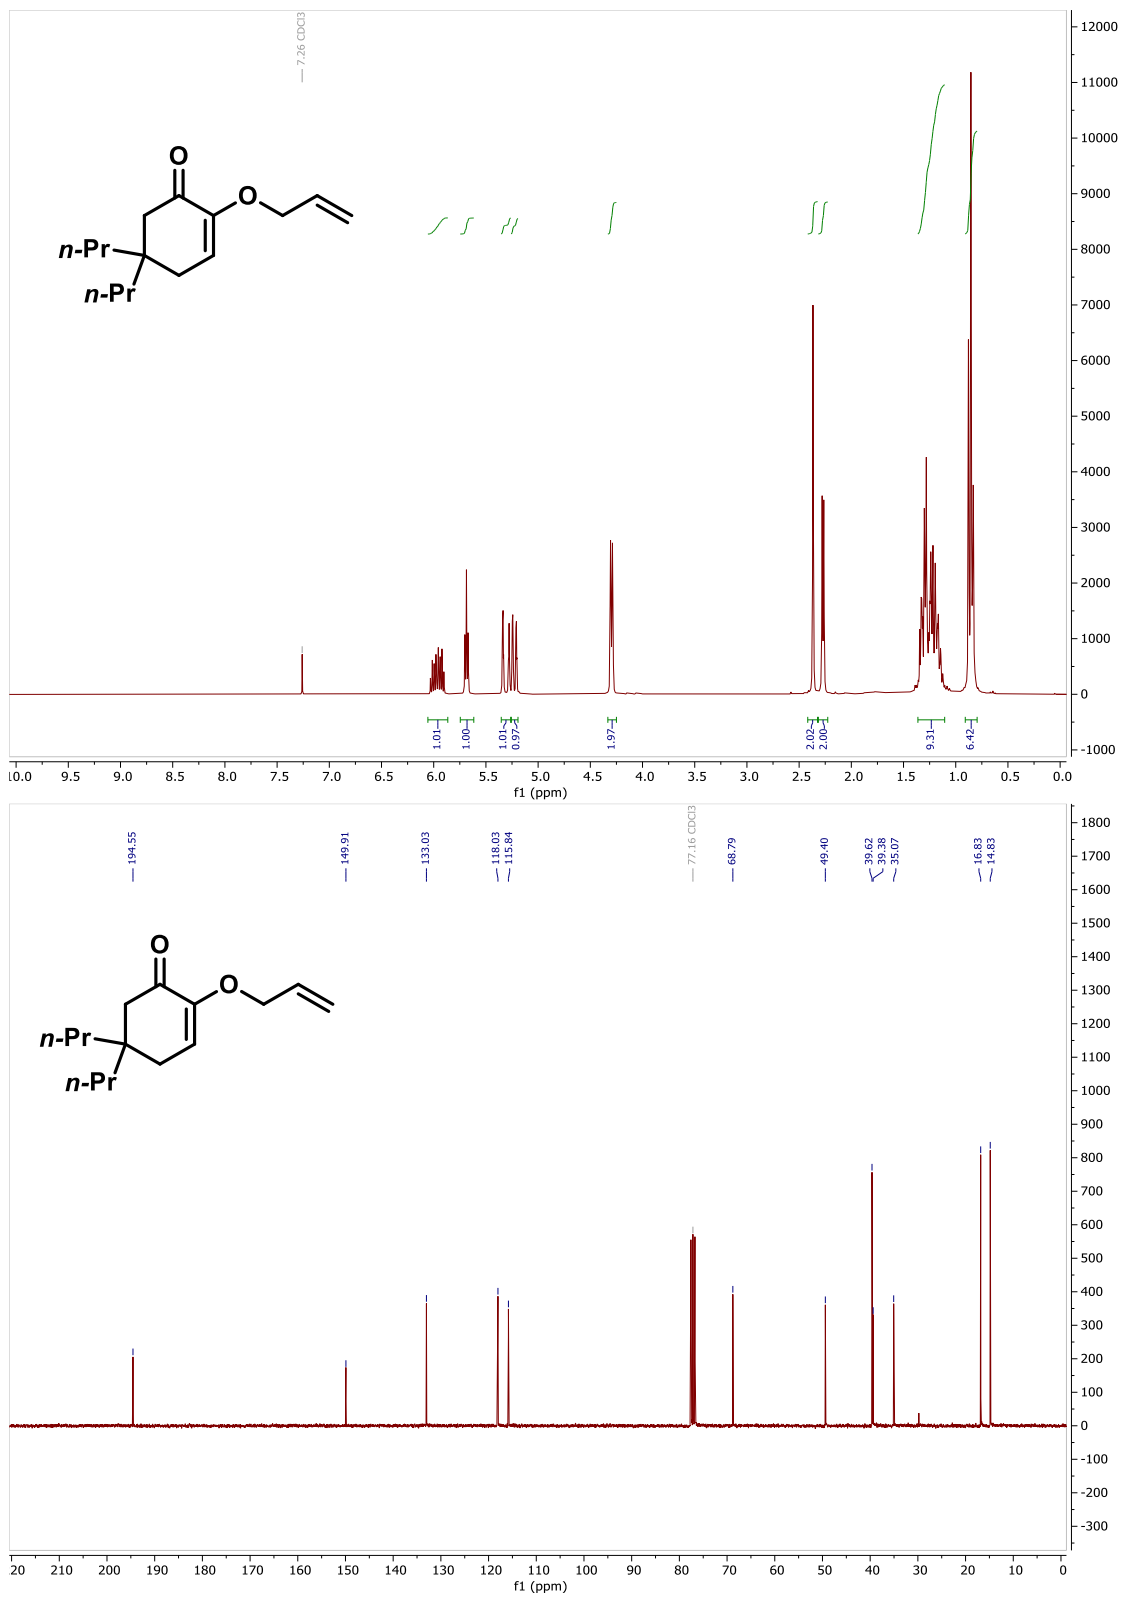

Figure S15: <sup>1</sup>H and <sup>13</sup>C NMR spectra for compound **4j** (300 and 75 MHz, CDCl<sub>3</sub>, 300K).

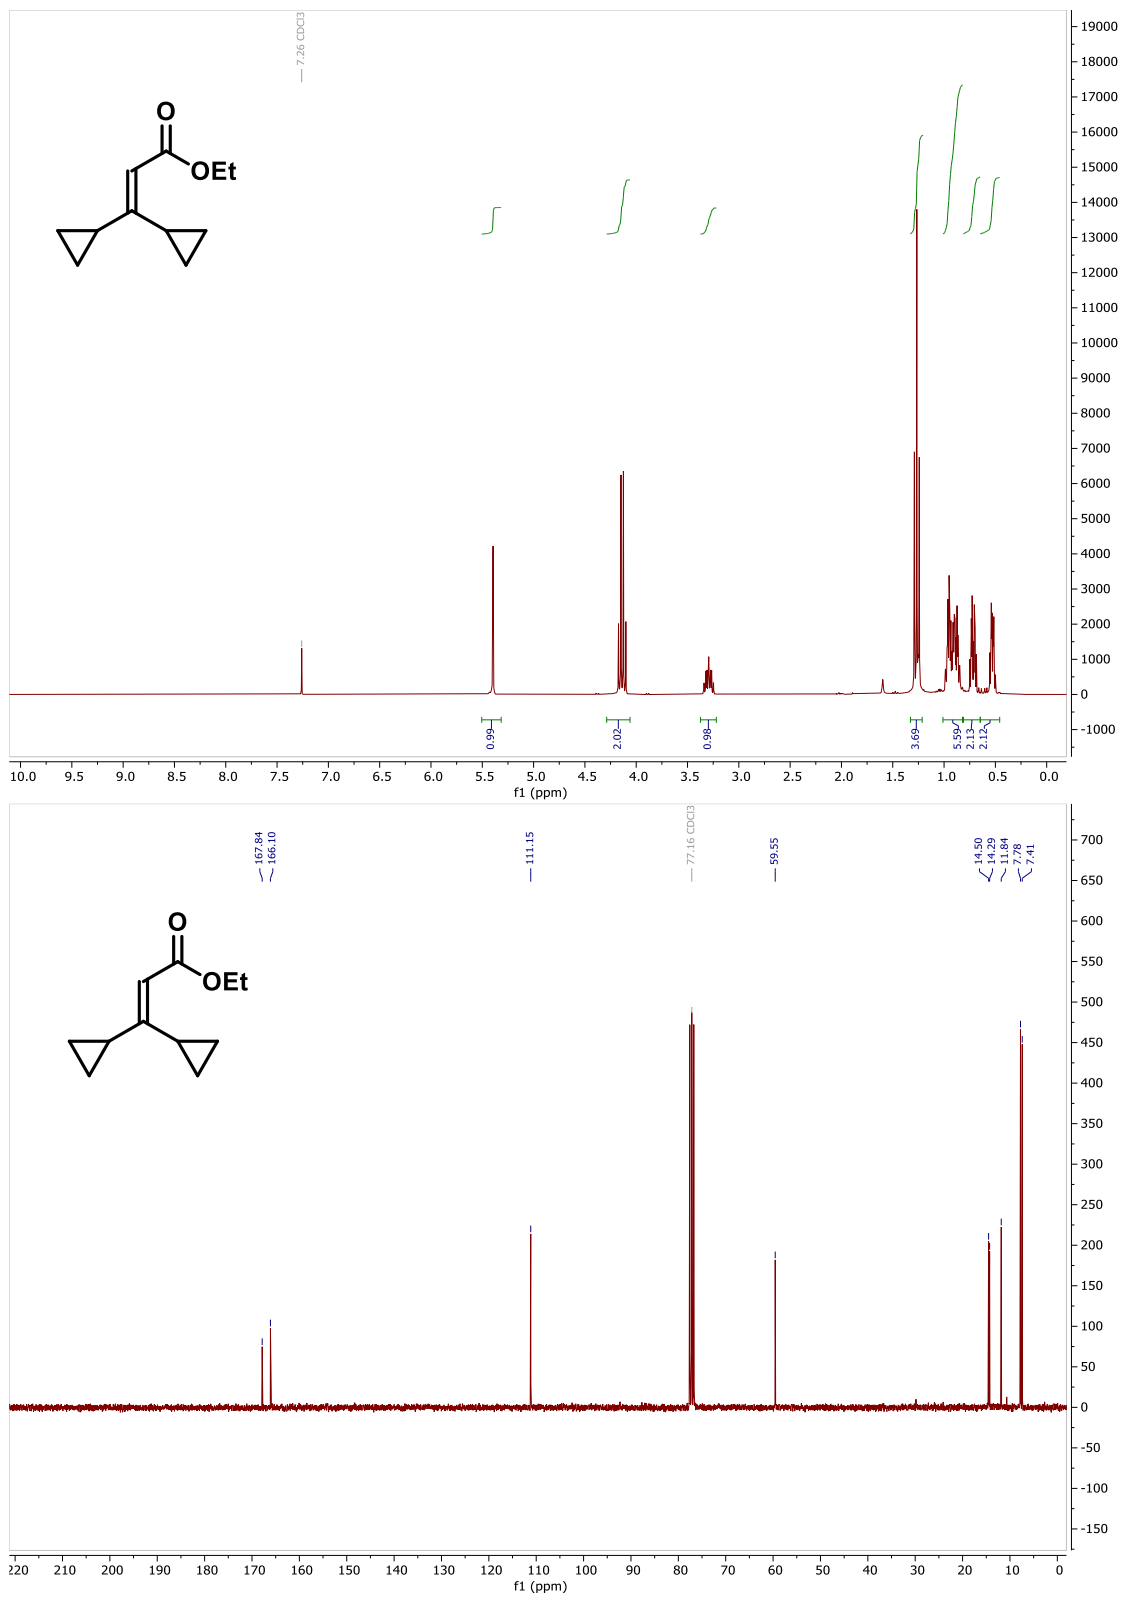

**Figure S16:** <sup>1</sup>H and <sup>13</sup>C NMR spectra for compound **S18** (300 and 75 MHz, CDCl<sub>3</sub>, 300K).

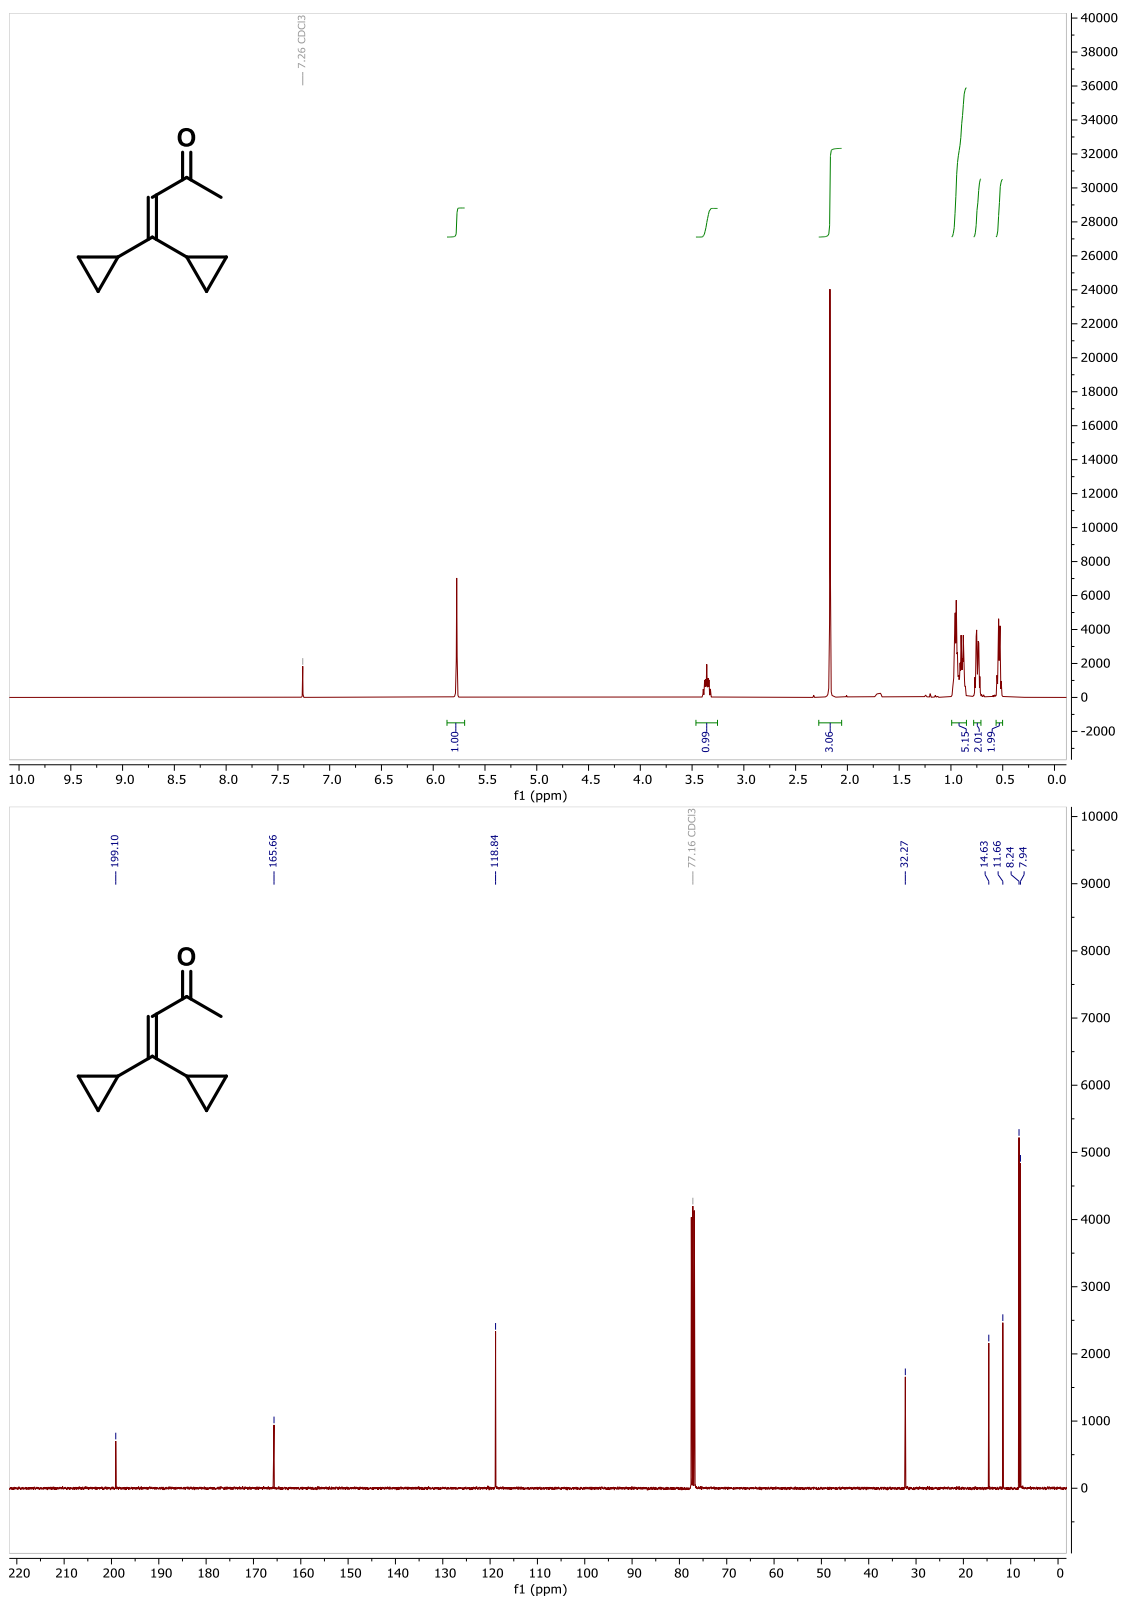

**Figure S17:** <sup>1</sup>H and <sup>13</sup>C NMR spectra for compound **S19** (400 and 101 MHz, CDCl<sub>3</sub>, 300K).



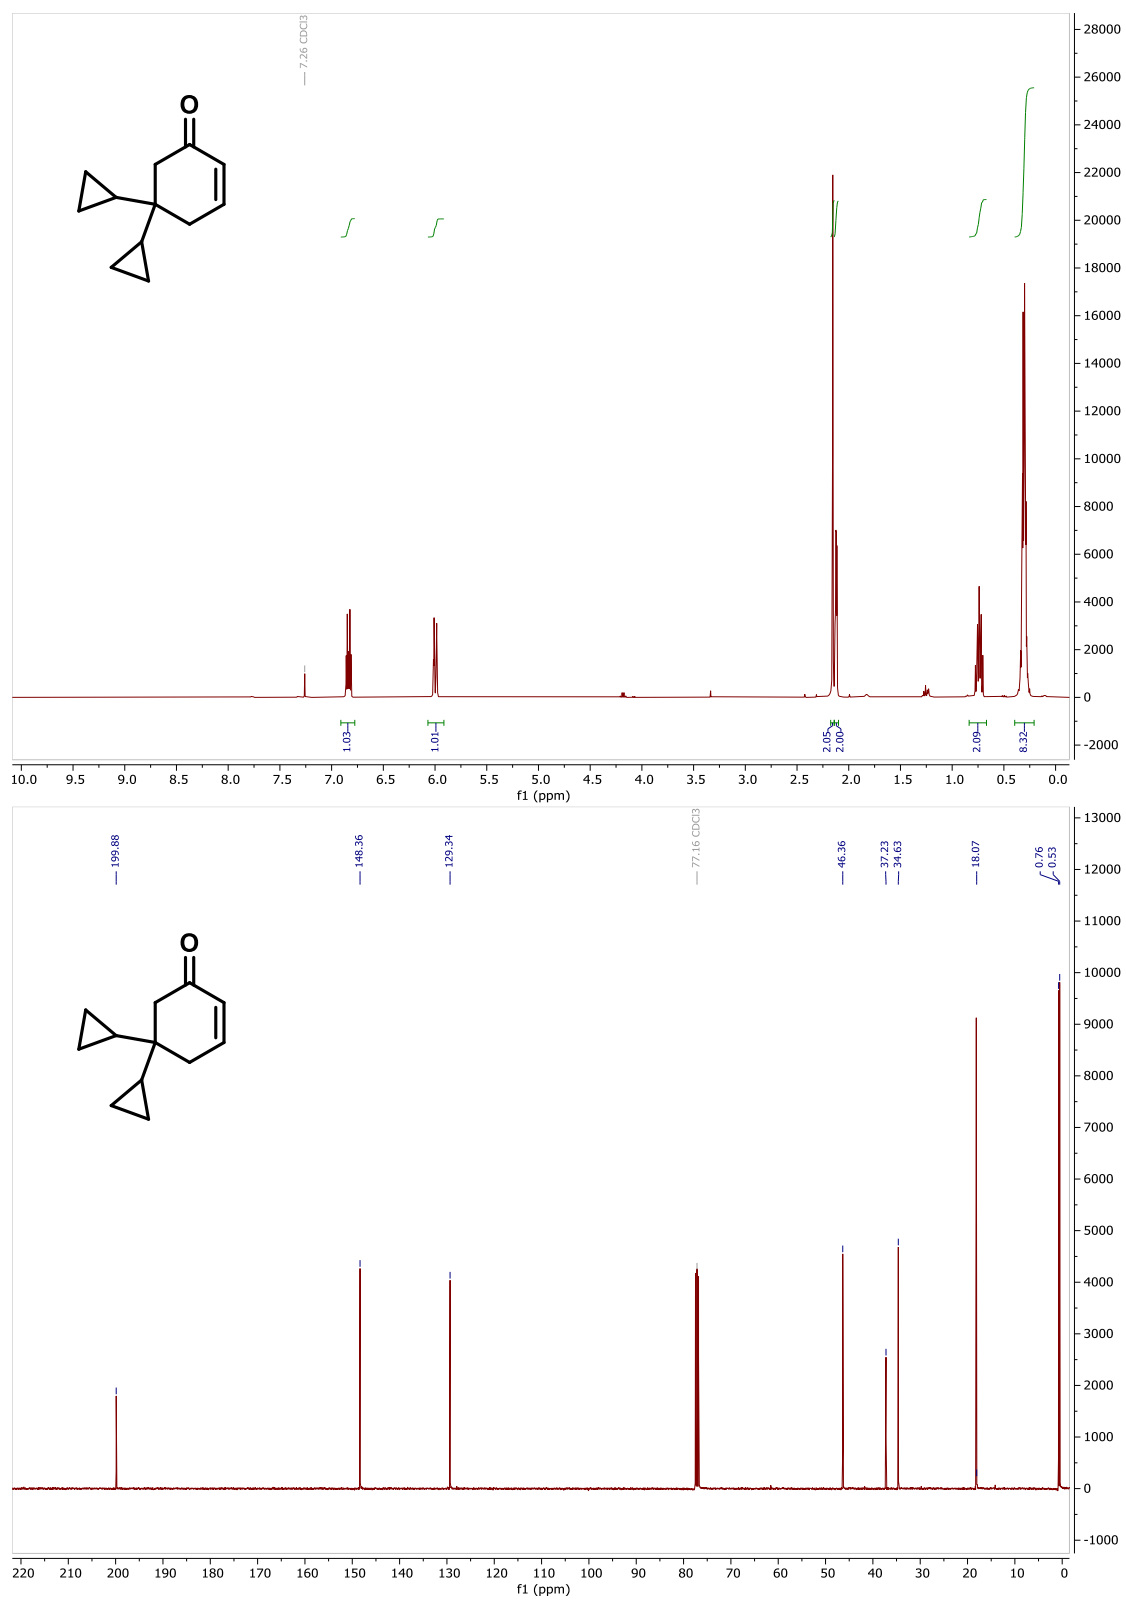

**Figure S18:**  $^1\text{H}$  and  $^{13}\text{C}$  NMR spectra for compound S21 (400 and 101 MHz,  $\text{CDCl}_3$ , 300K).

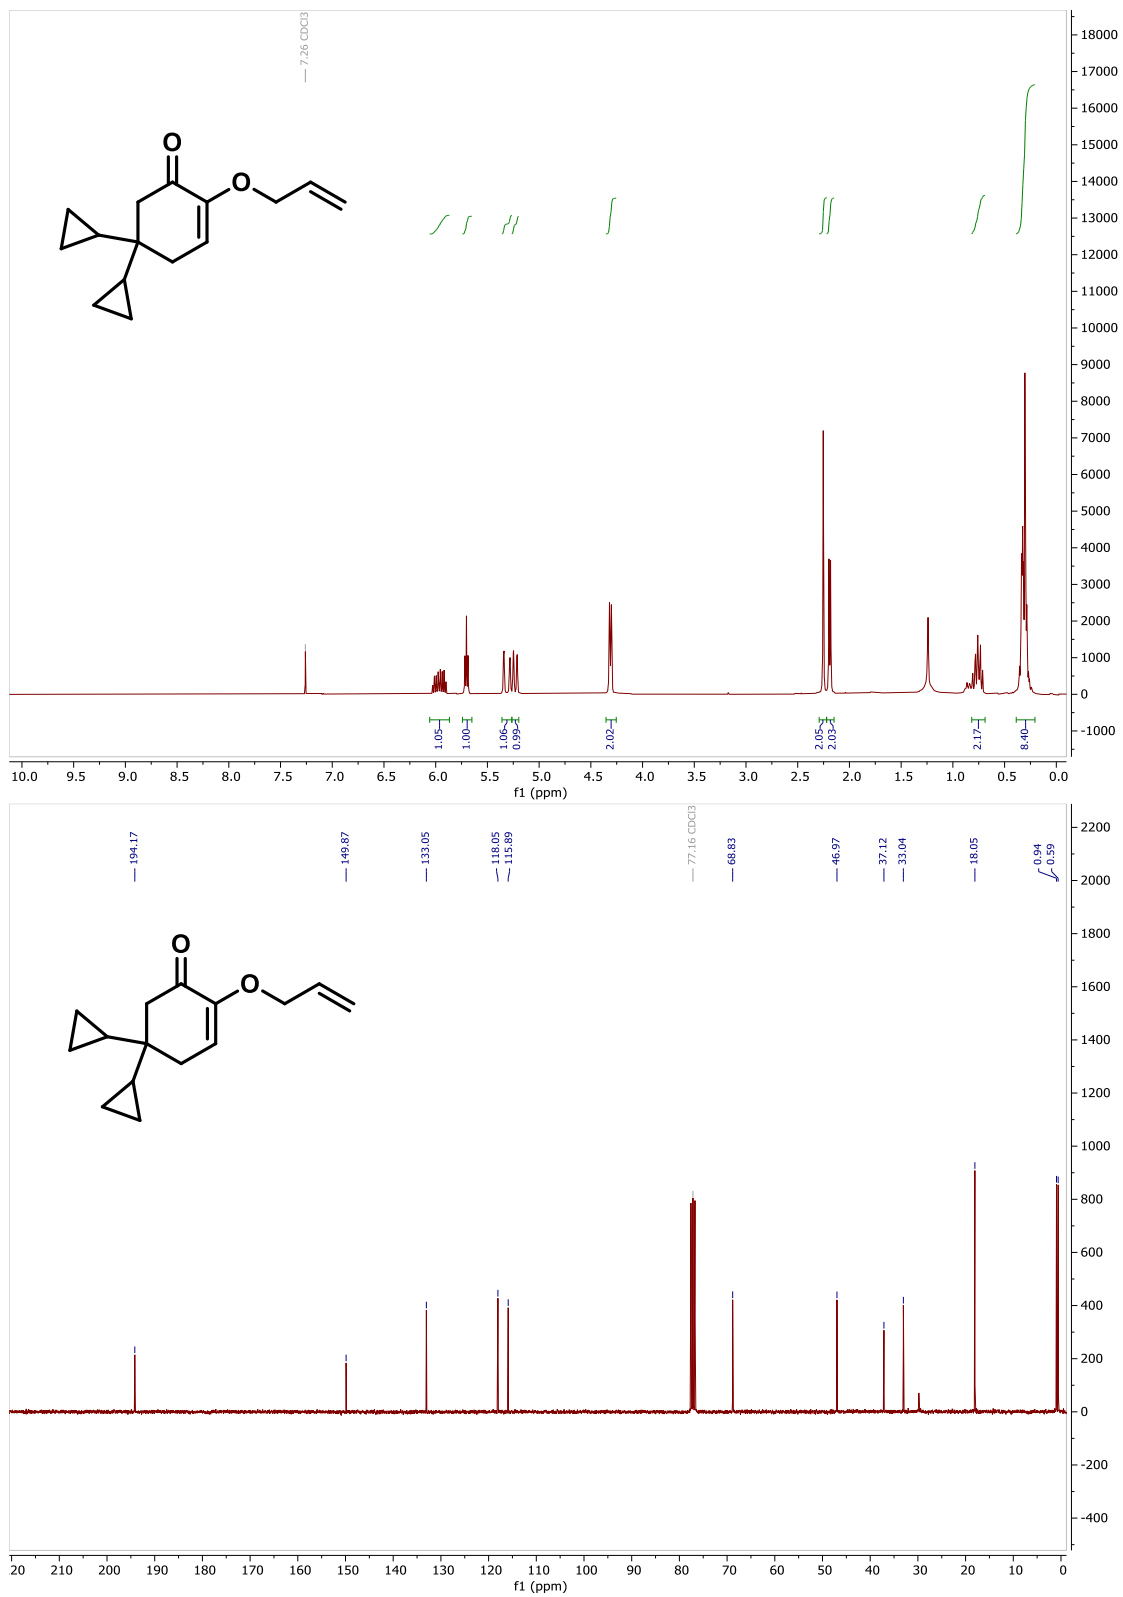

**Figure S19:** <sup>1</sup>H and <sup>13</sup>C NMR spectra for compound **4k** (300 and 75 MHz, CDCl<sub>3</sub>, 300K).

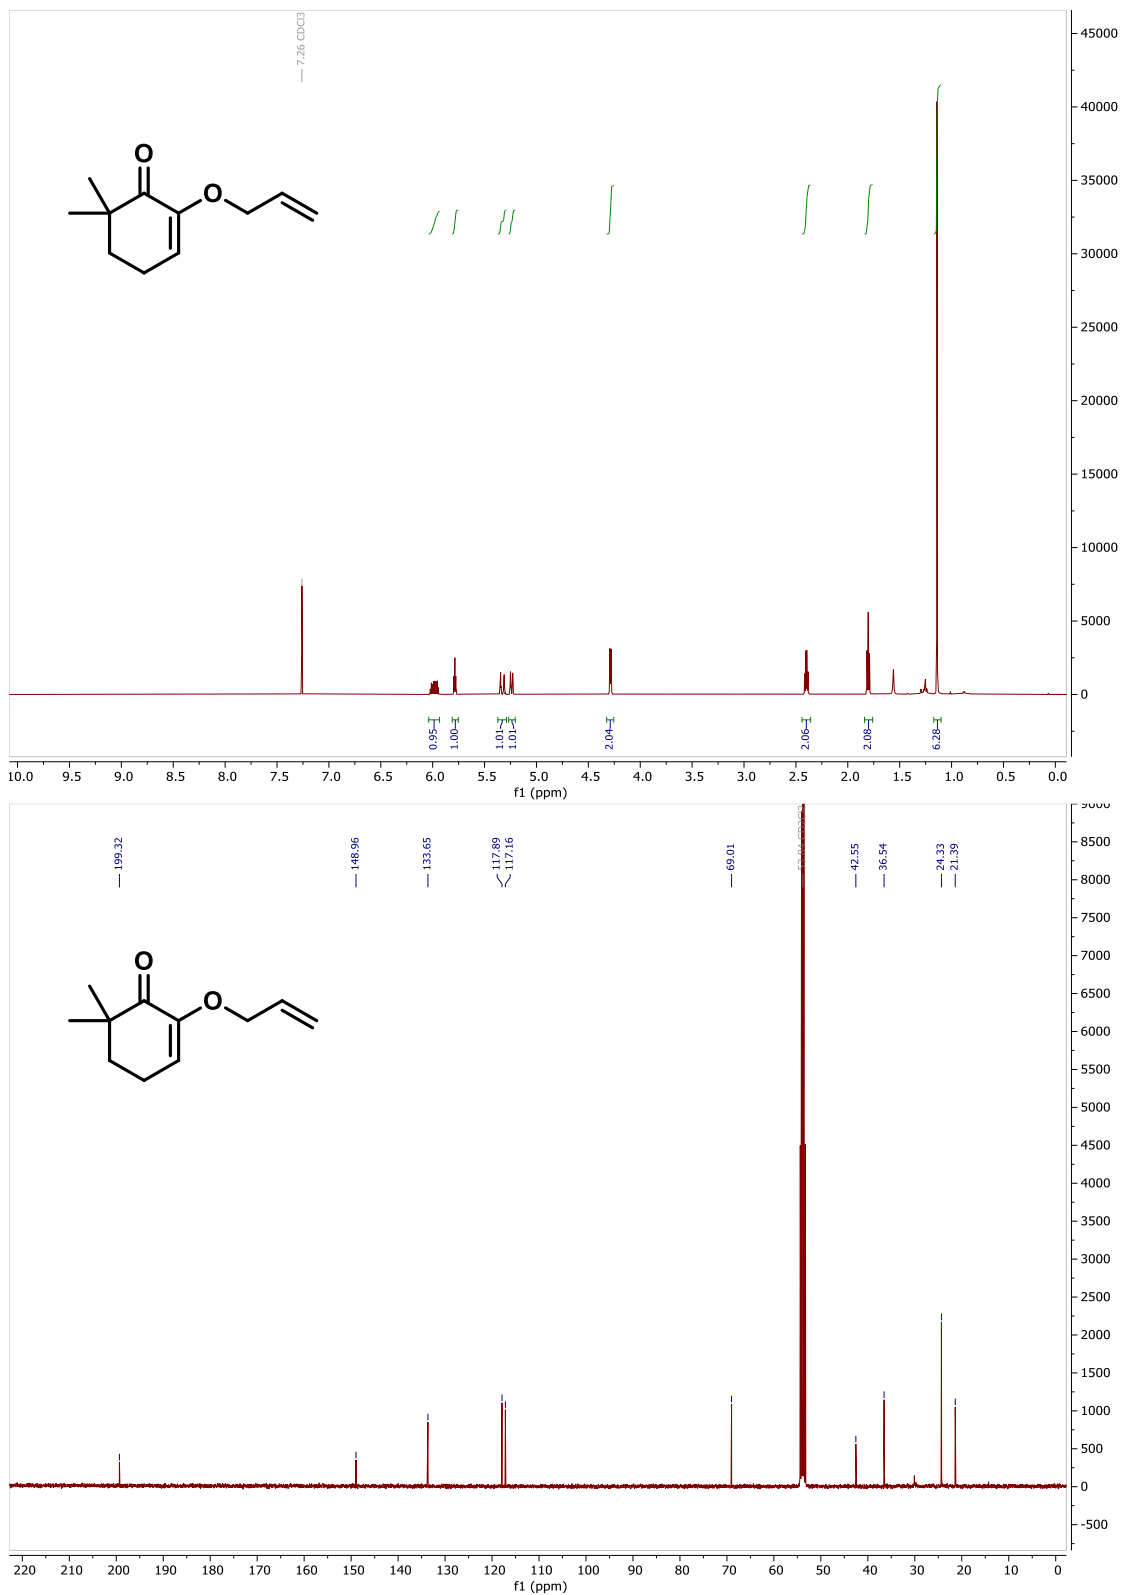

**Figure S20:** <sup>1</sup>H and <sup>13</sup>C NMR spectra for compound **4I** (500 and 101 MHz, CDCl<sub>3</sub> and CD<sub>2</sub>Cl<sub>2</sub>, 300K).

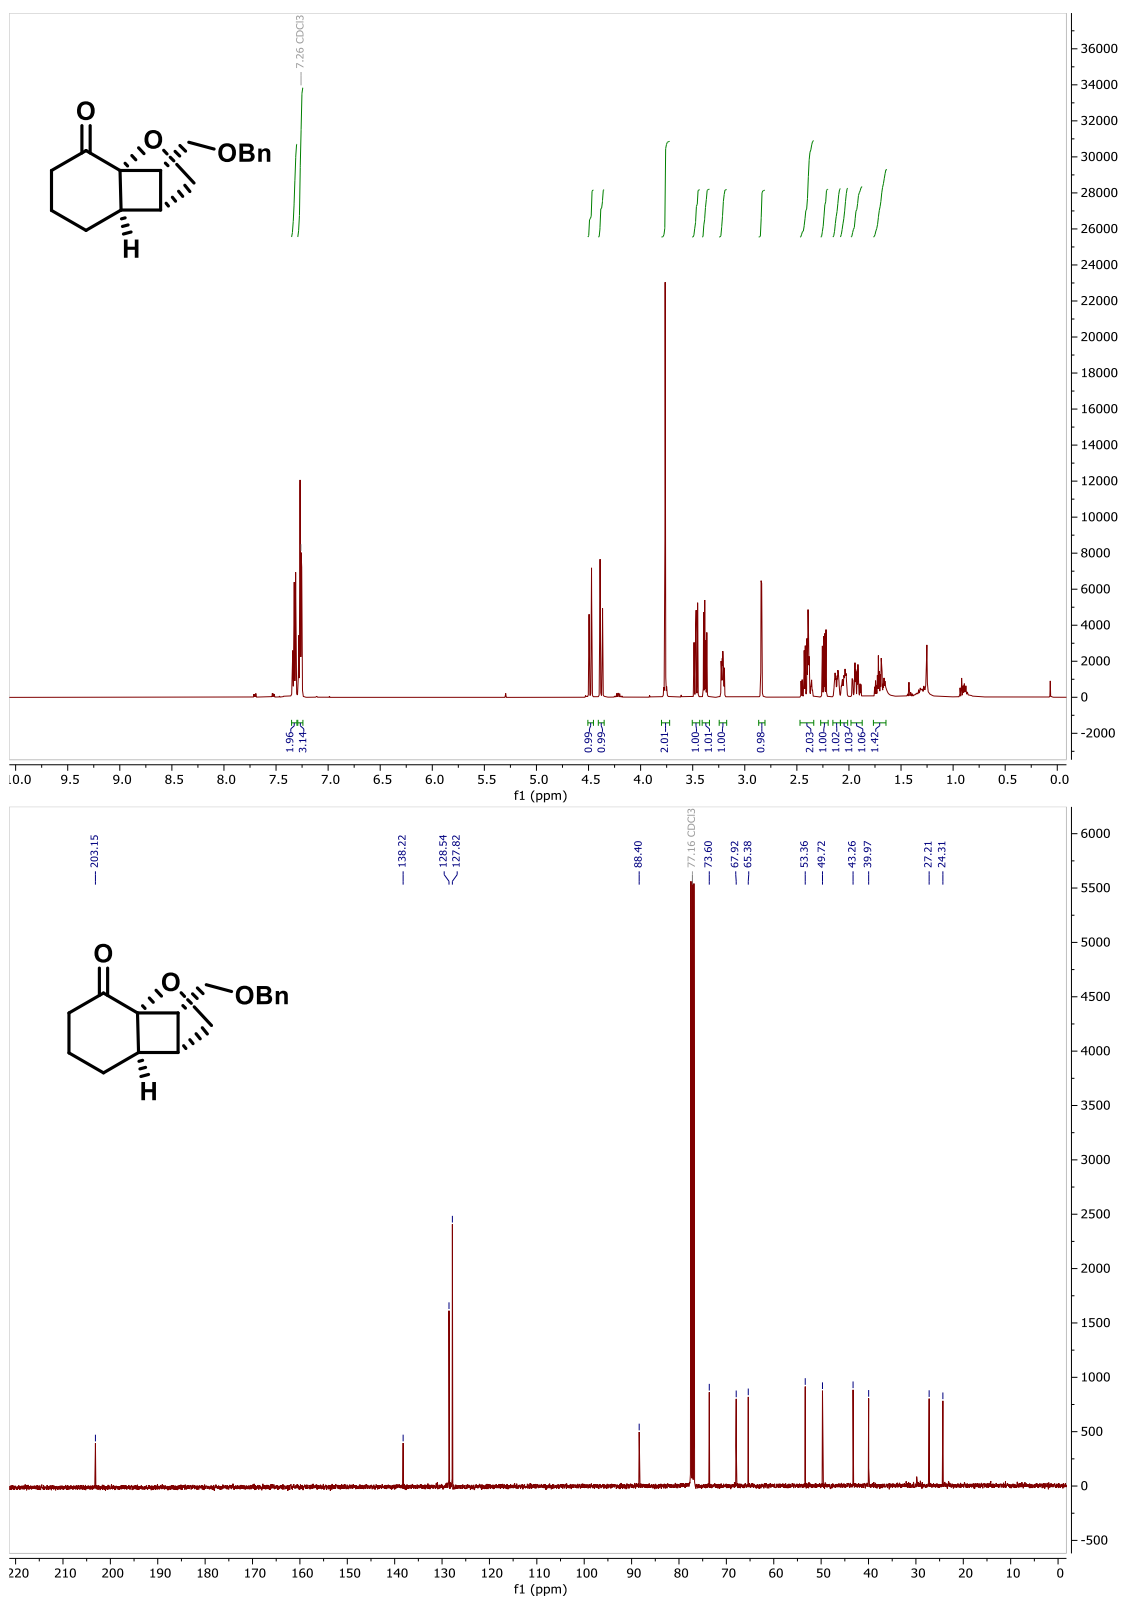

**Figure S21:** <sup>1</sup>H and <sup>13</sup>C NMR spectra for compound **5d** (500 and 101 MHz, CDCl<sub>3</sub>, 300K).

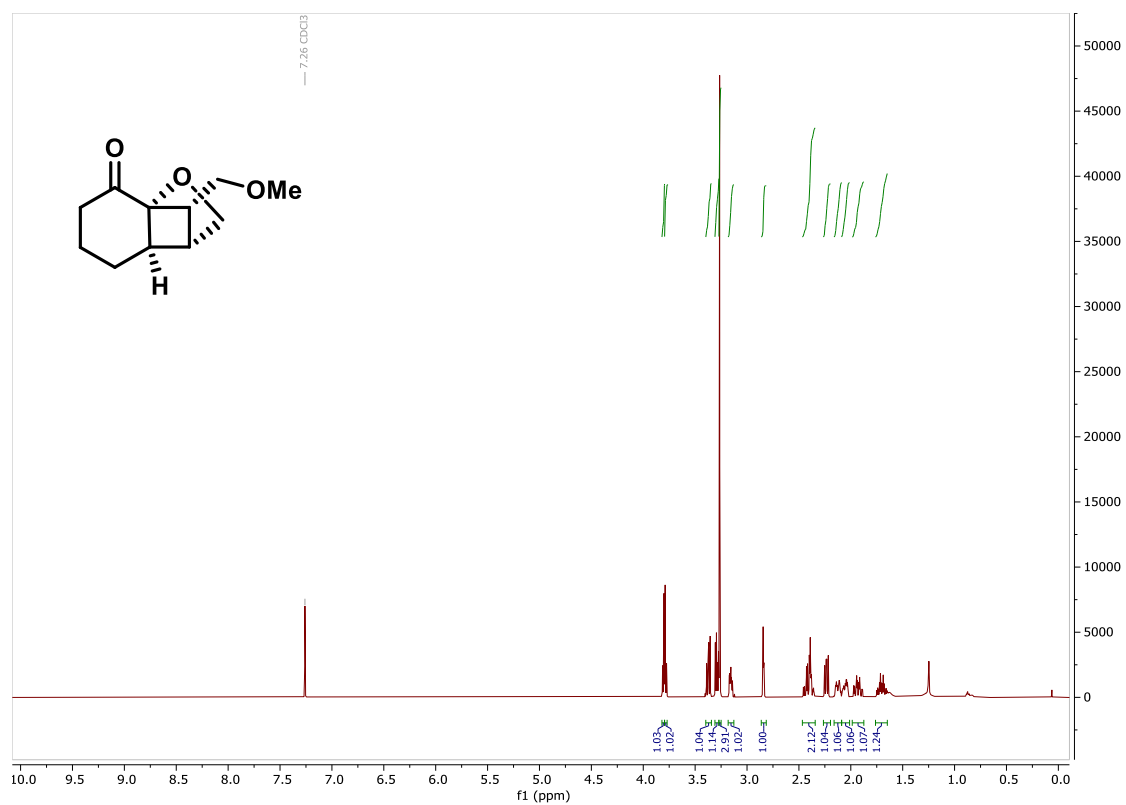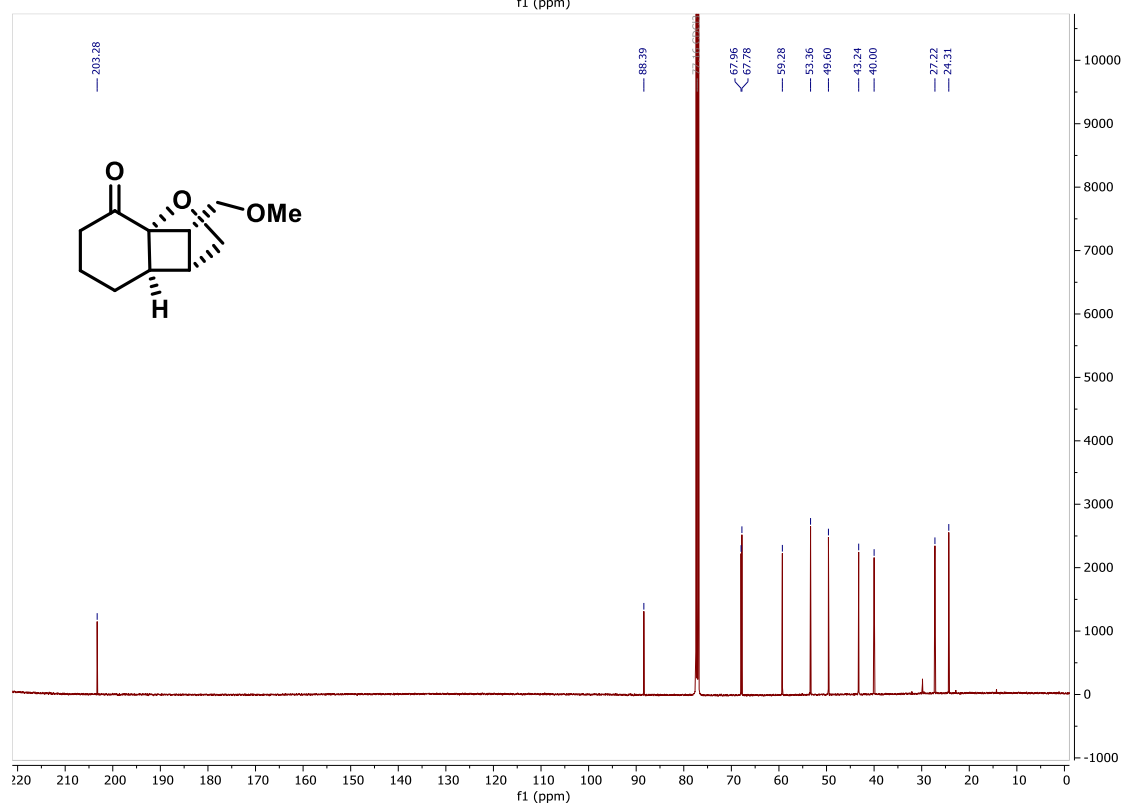

**Figure S22:** <sup>1</sup>H and <sup>13</sup>C NMR spectra for compound **5e** (500 and 126 MHz, CDCl<sub>3</sub>, 300K).

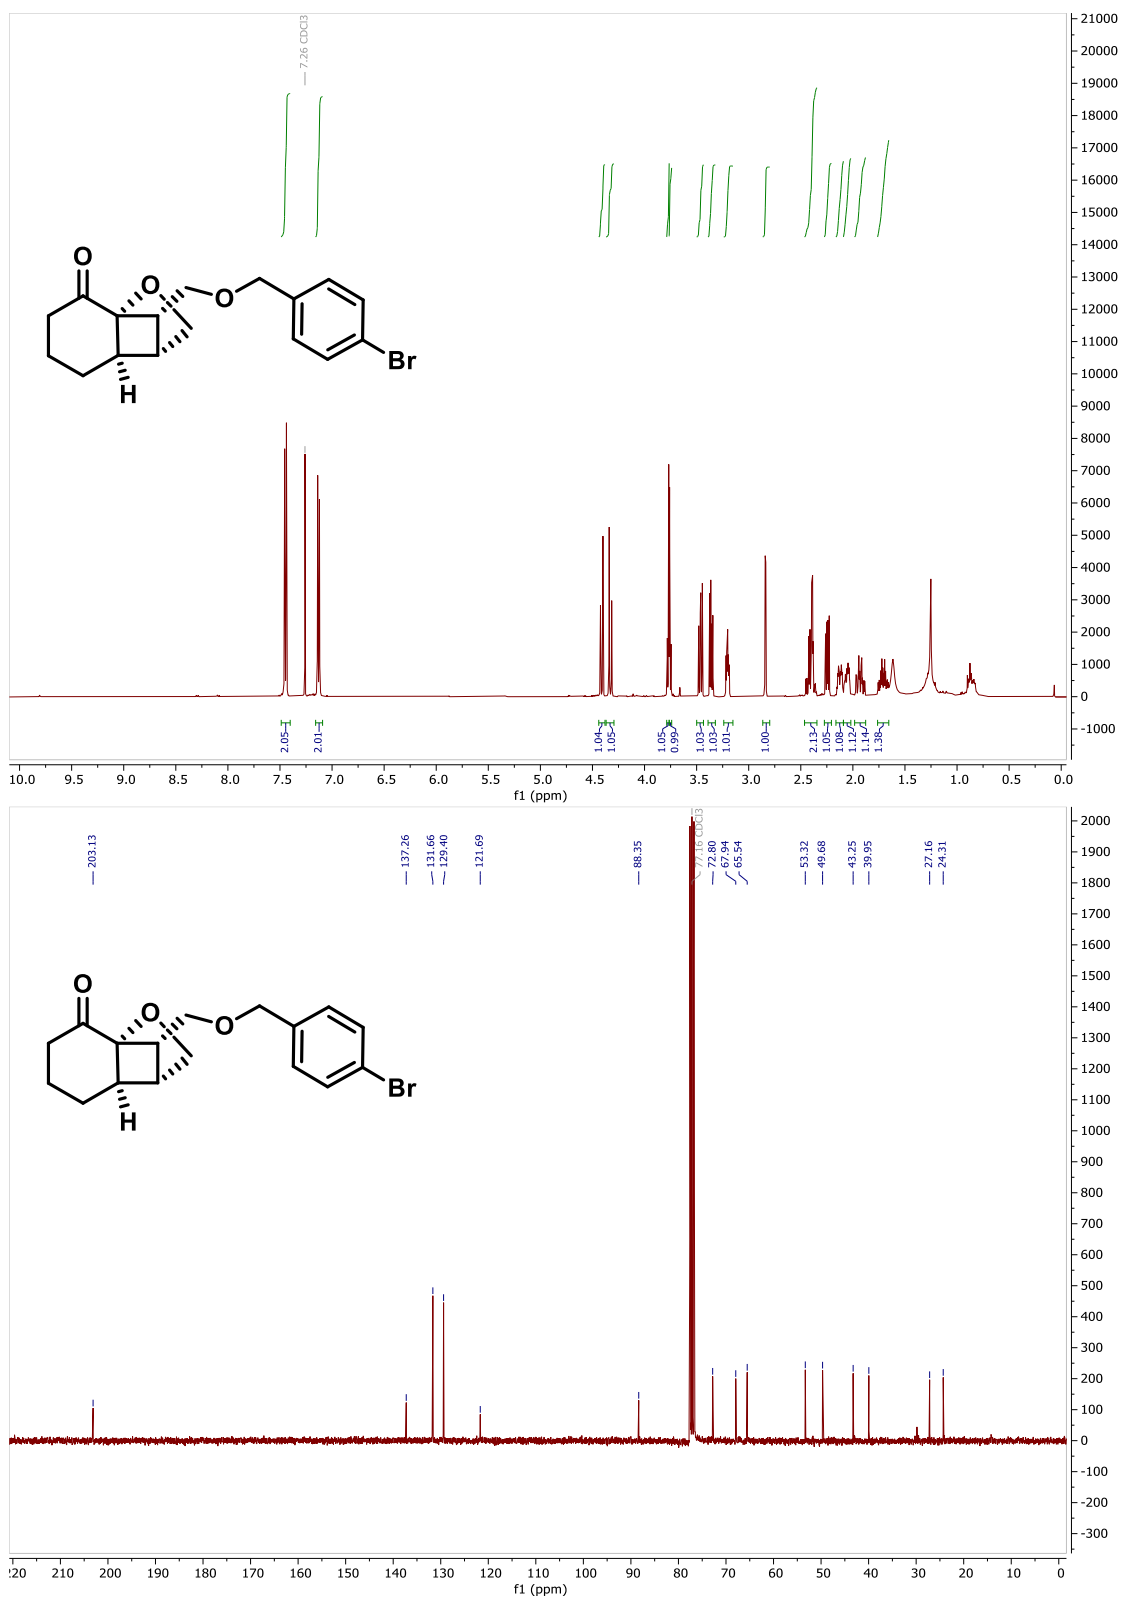

**Figure S23:** <sup>1</sup>H and <sup>13</sup>C NMR spectra for compound **5f** (500 and 75 MHz, CDCl<sub>3</sub>, 300K).

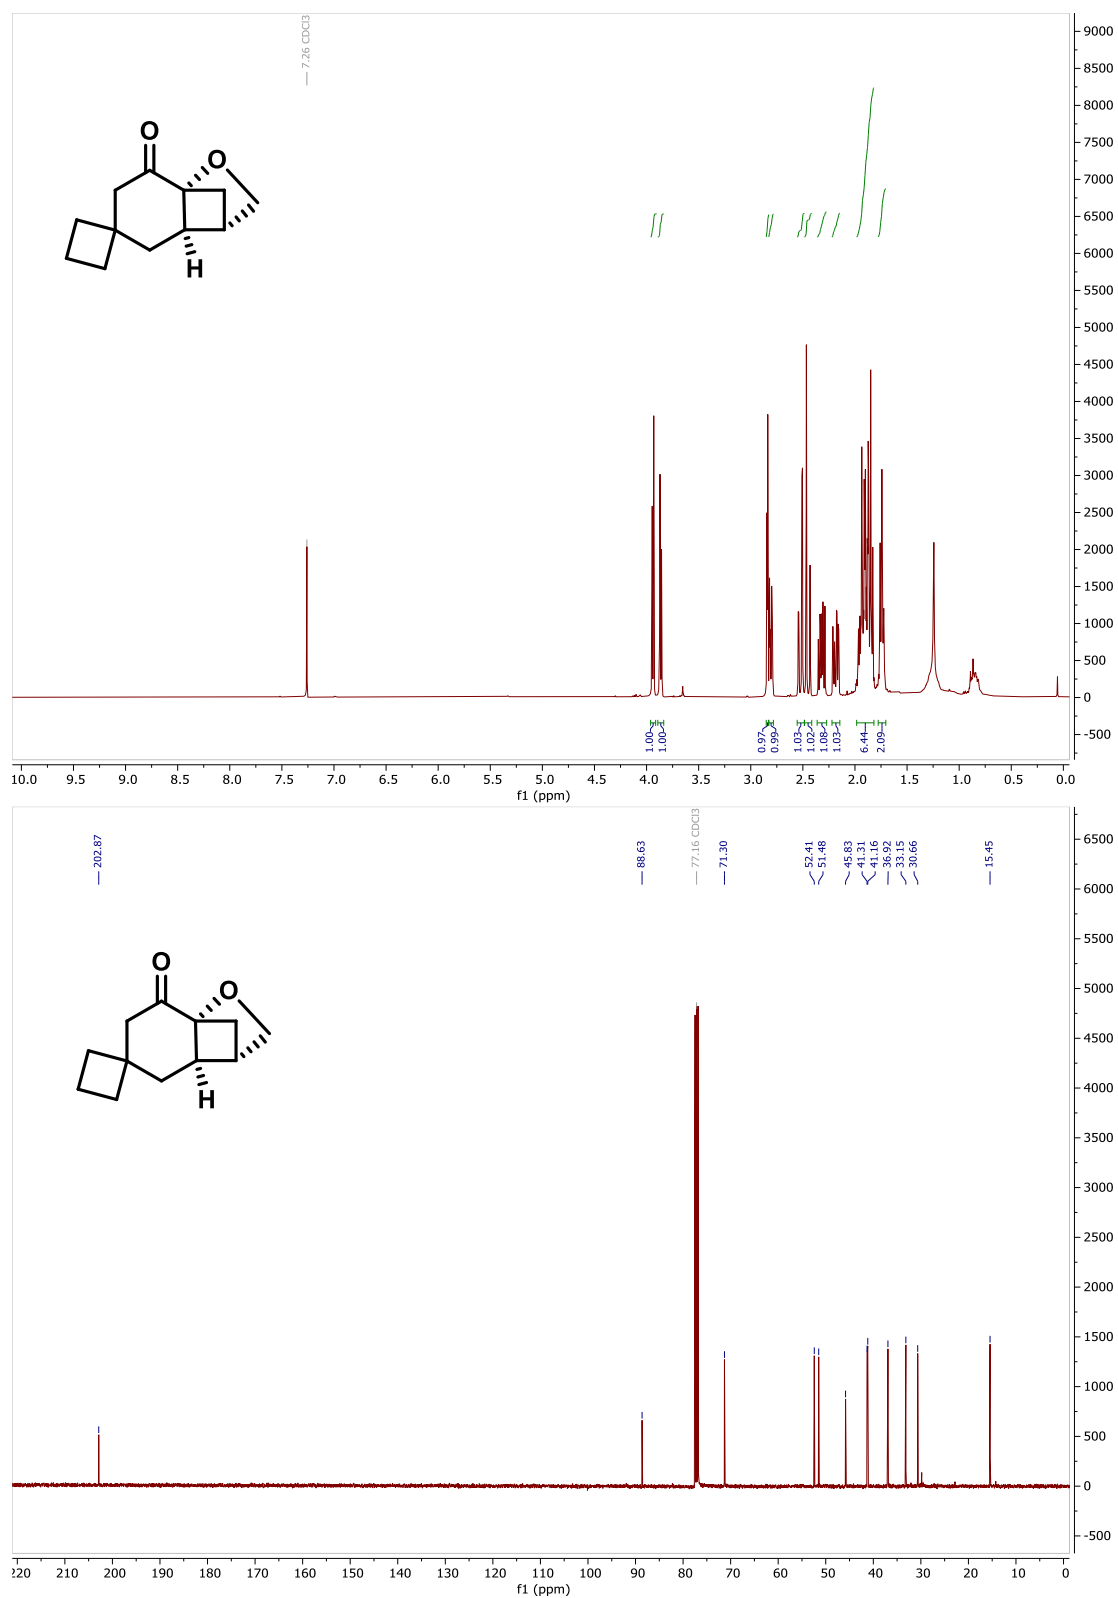

**Figure S24:** <sup>1</sup>H and <sup>13</sup>C NMR spectra for compound **5h** (400 and 101 MHz, CDCl<sub>3</sub>, 300K).

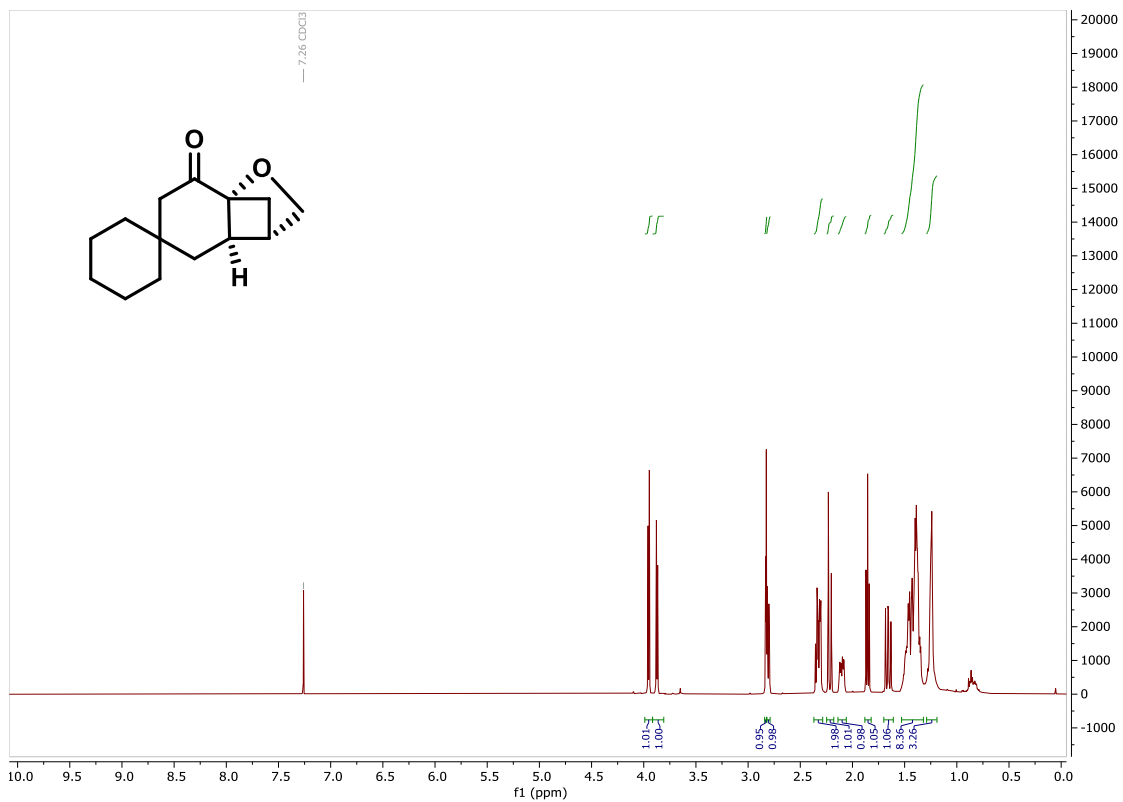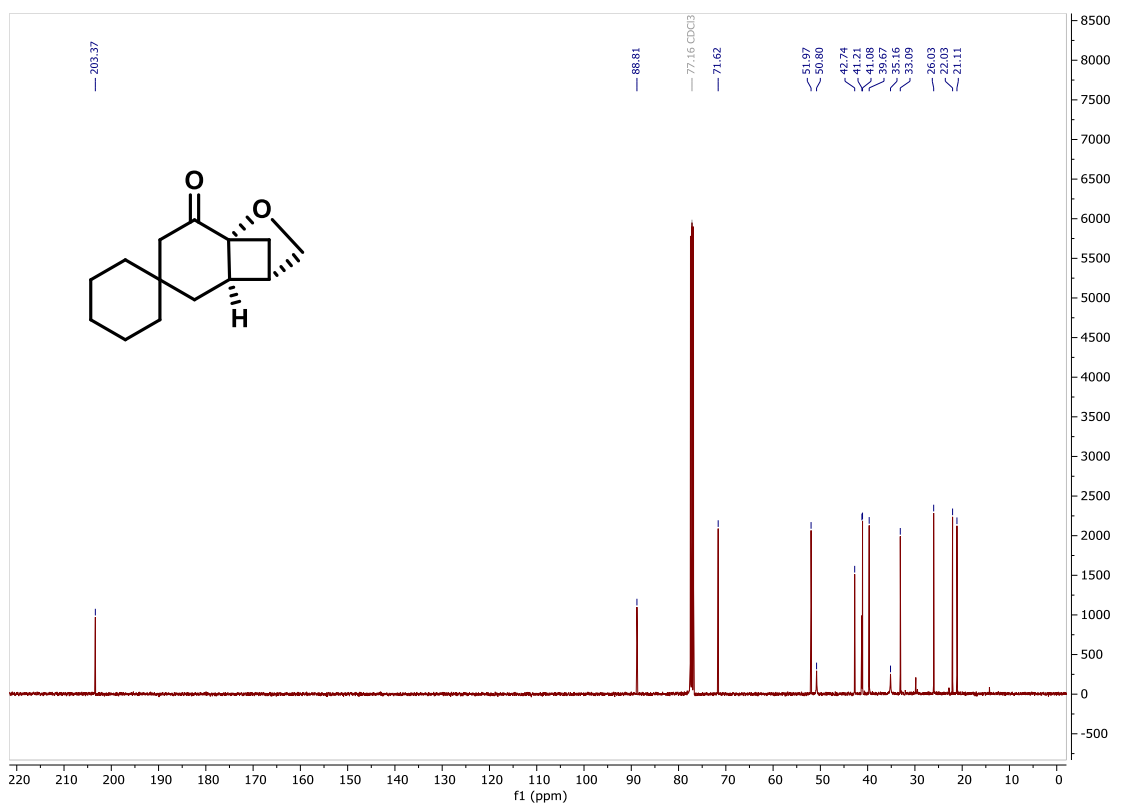

**Figure S25:** <sup>1</sup>H and <sup>13</sup>C NMR spectra for compound **5i** (500 and 101 MHz, CDCl<sub>3</sub>, 300K).



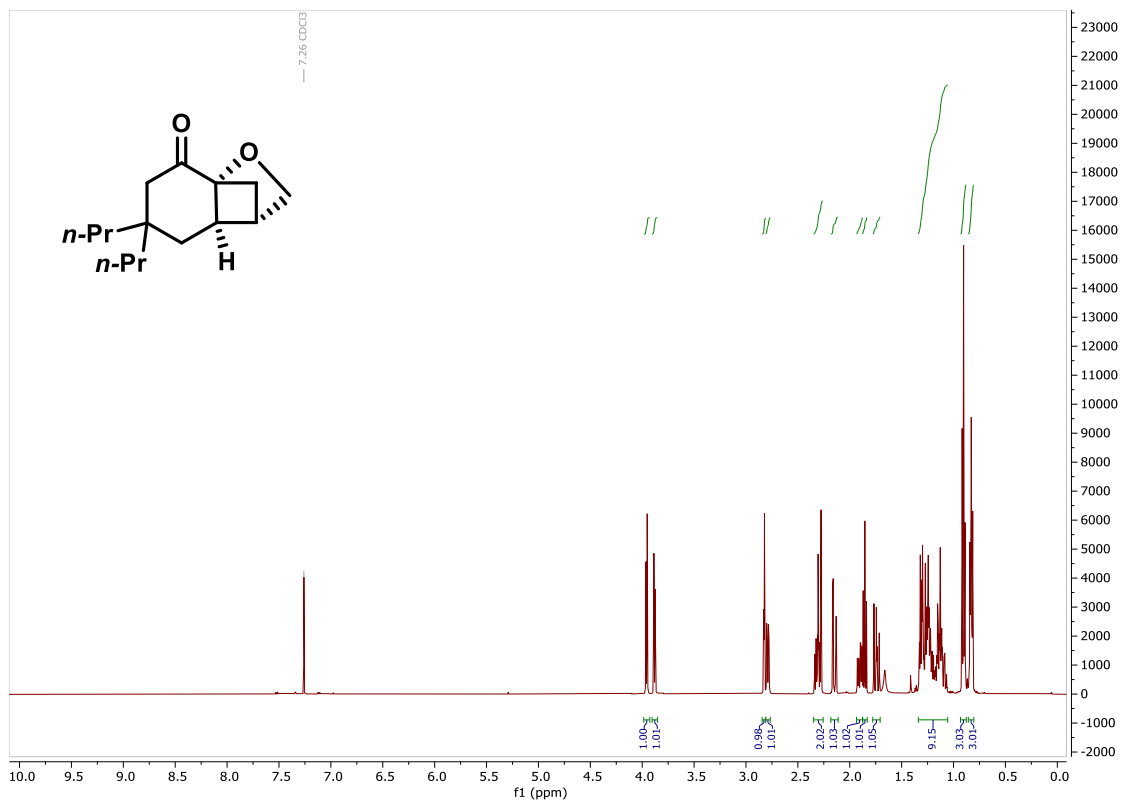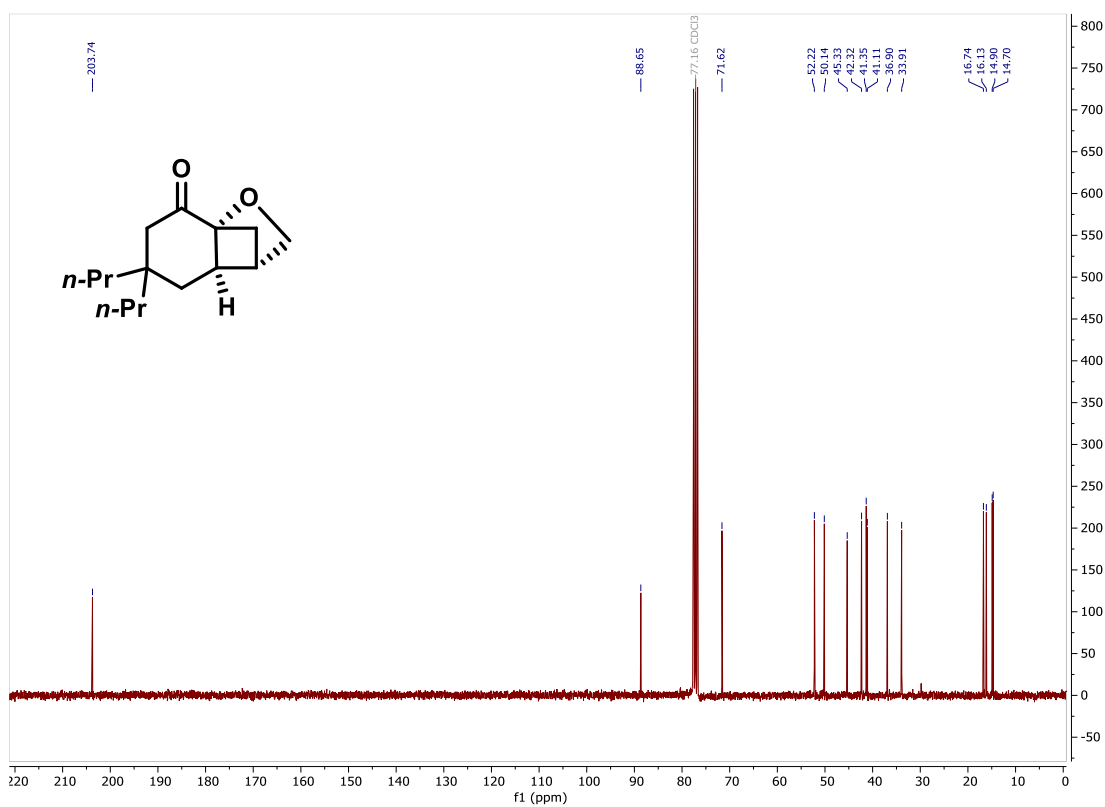

Figure S26: <sup>1</sup>H and <sup>13</sup>C NMR spectra for compound **5j** (500 and 75 MHz, CDCl<sub>3</sub>, 300K).

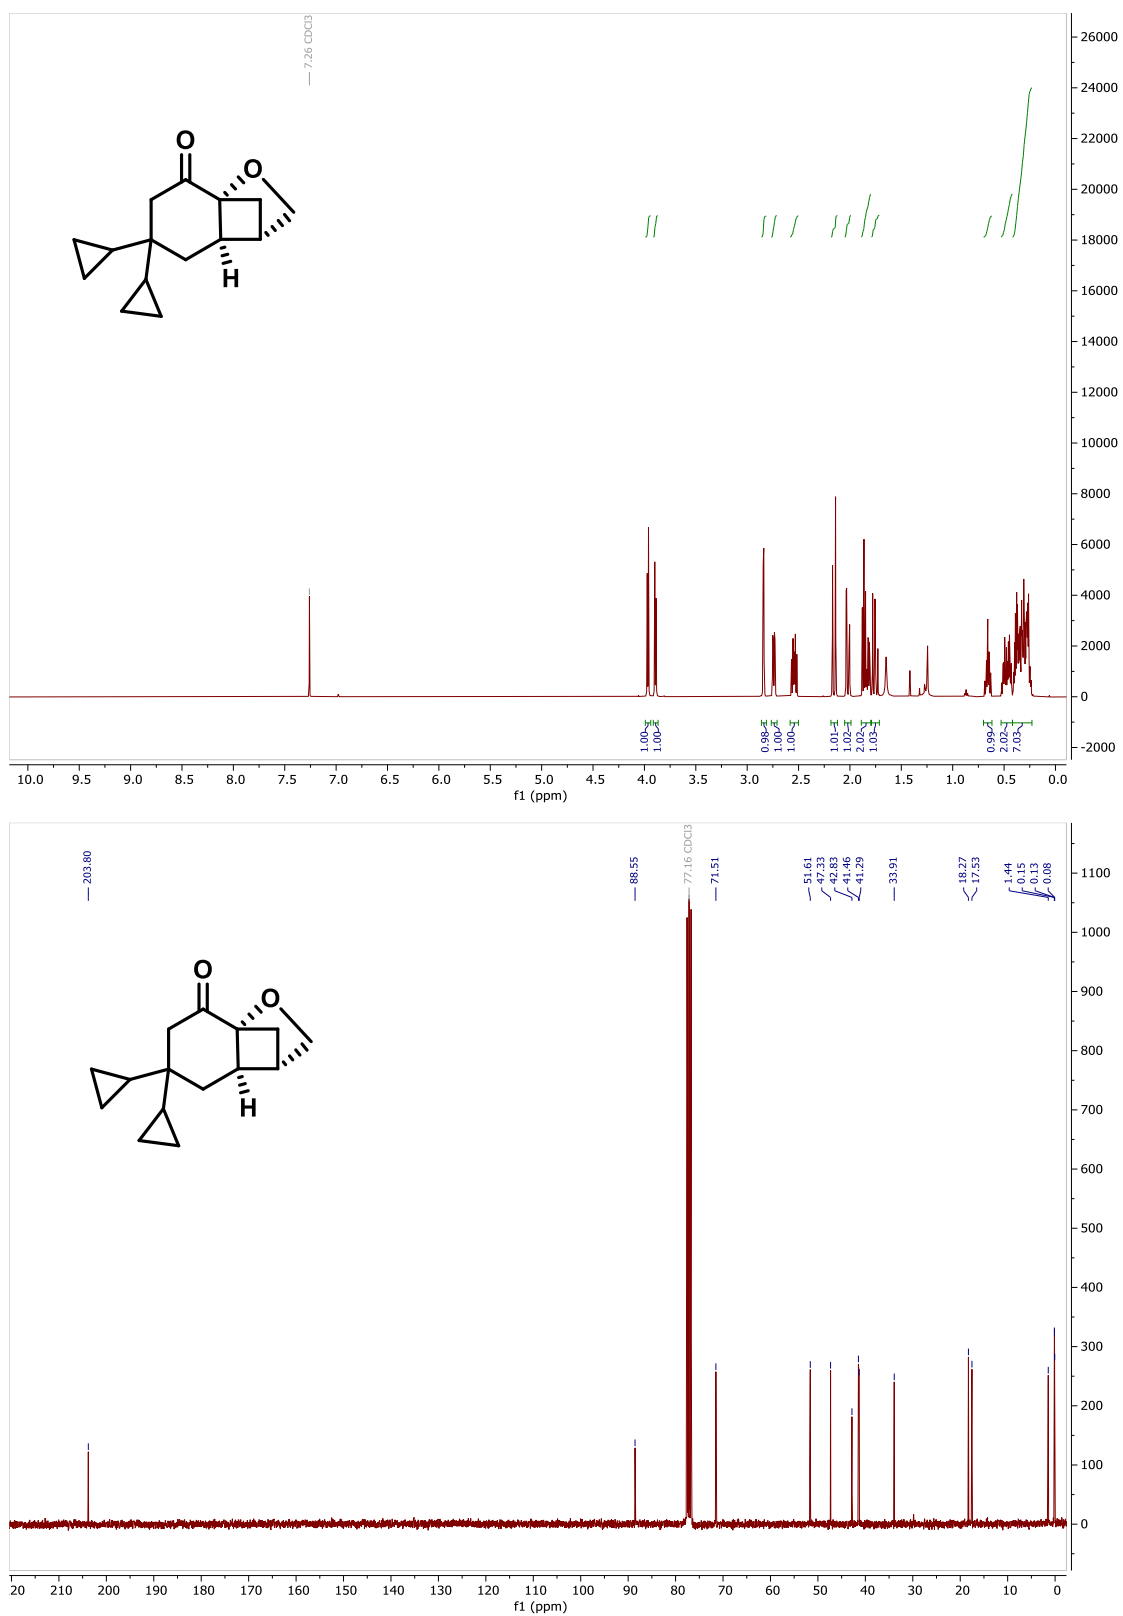

**Figure S27:**  $^1\text{H}$  and  $^{13}\text{C}$  NMR spectra for compound **5k** (500 and 75 MHz,  $\text{CDCl}_3$ , 300K).

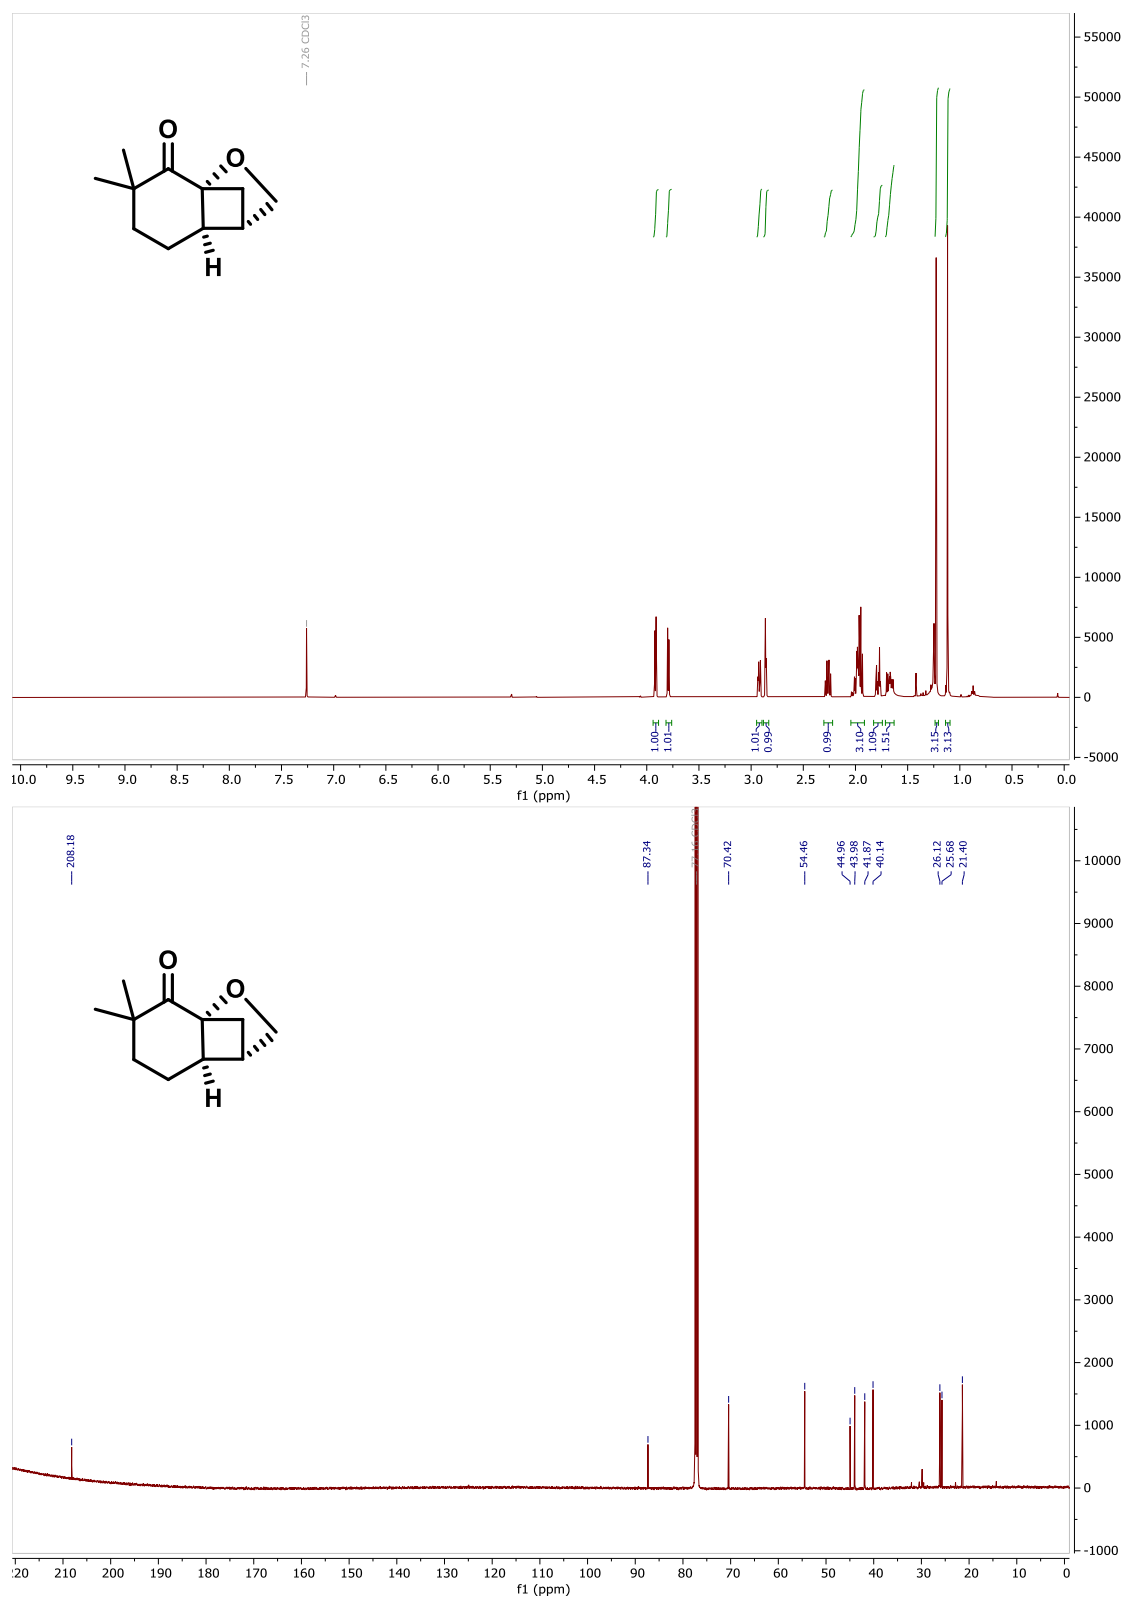

**Figure S28:** <sup>1</sup>H and <sup>13</sup>C NMR spectra for compound **5I** (500 and 126 MHz, CDCl<sub>3</sub>, 300K).

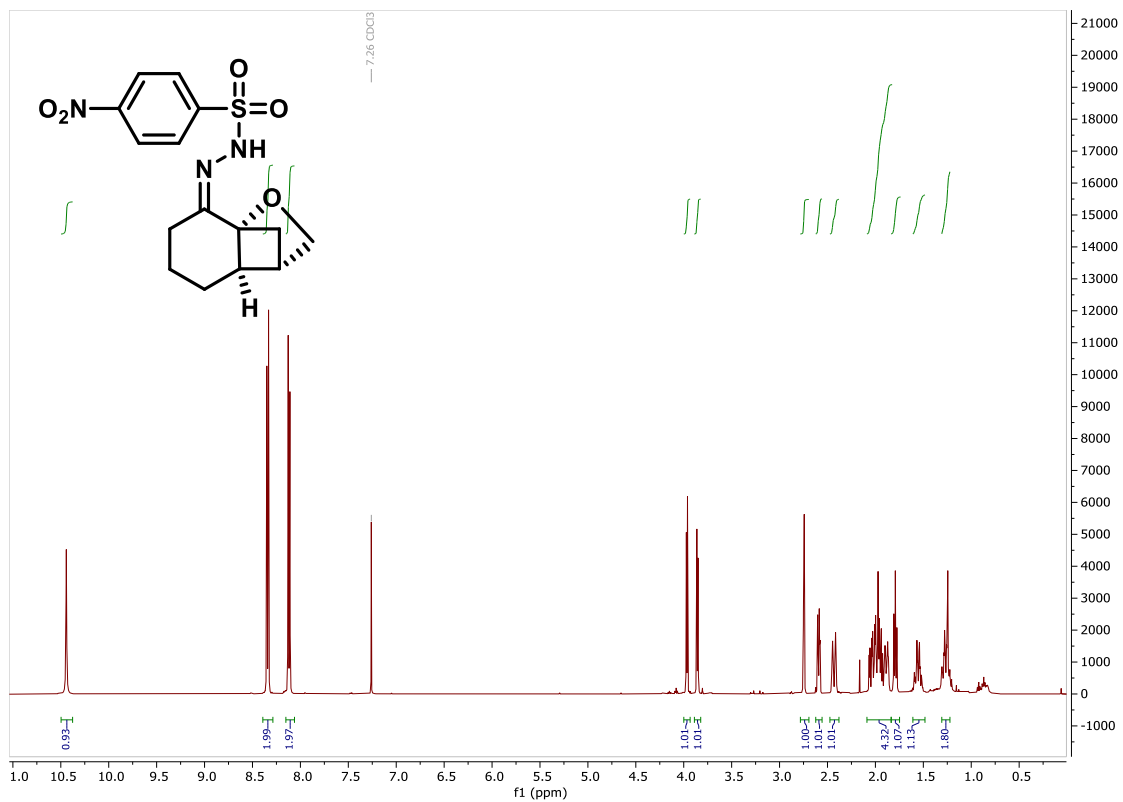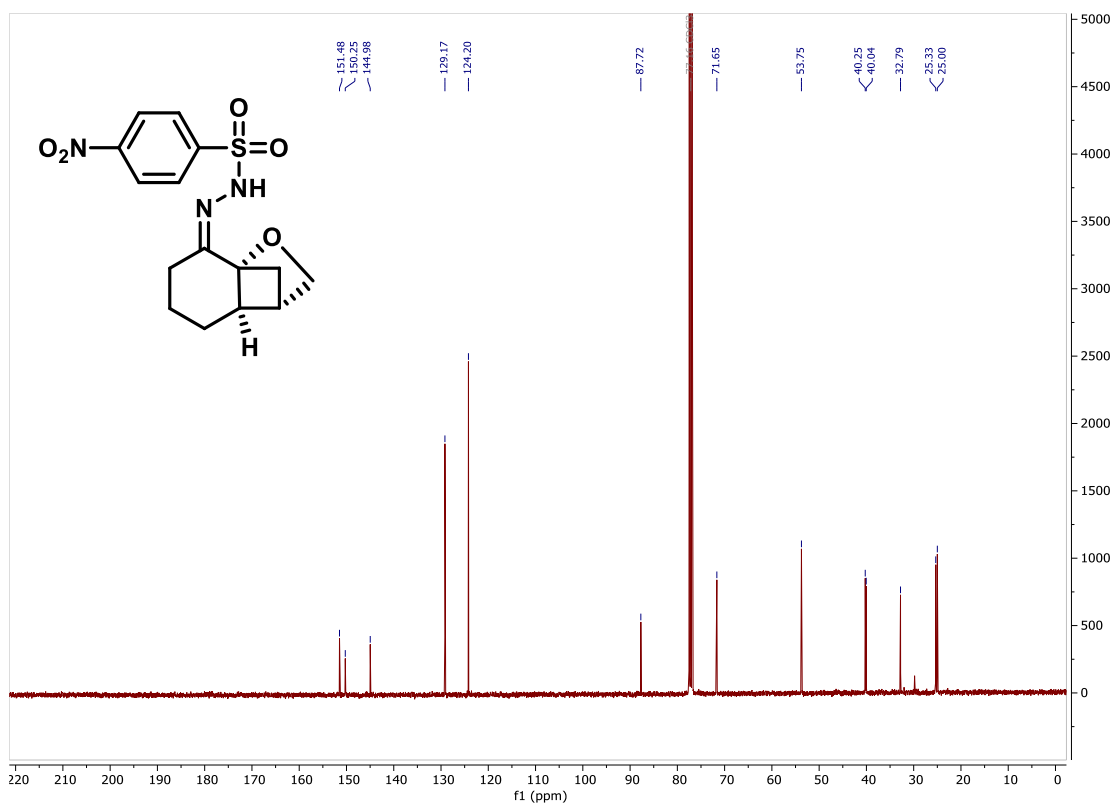

Figure S29: <sup>1</sup>H and <sup>13</sup>C NMR spectra for compound 7 (500 and 101 MHz, CDCl<sub>3</sub>, 300K).

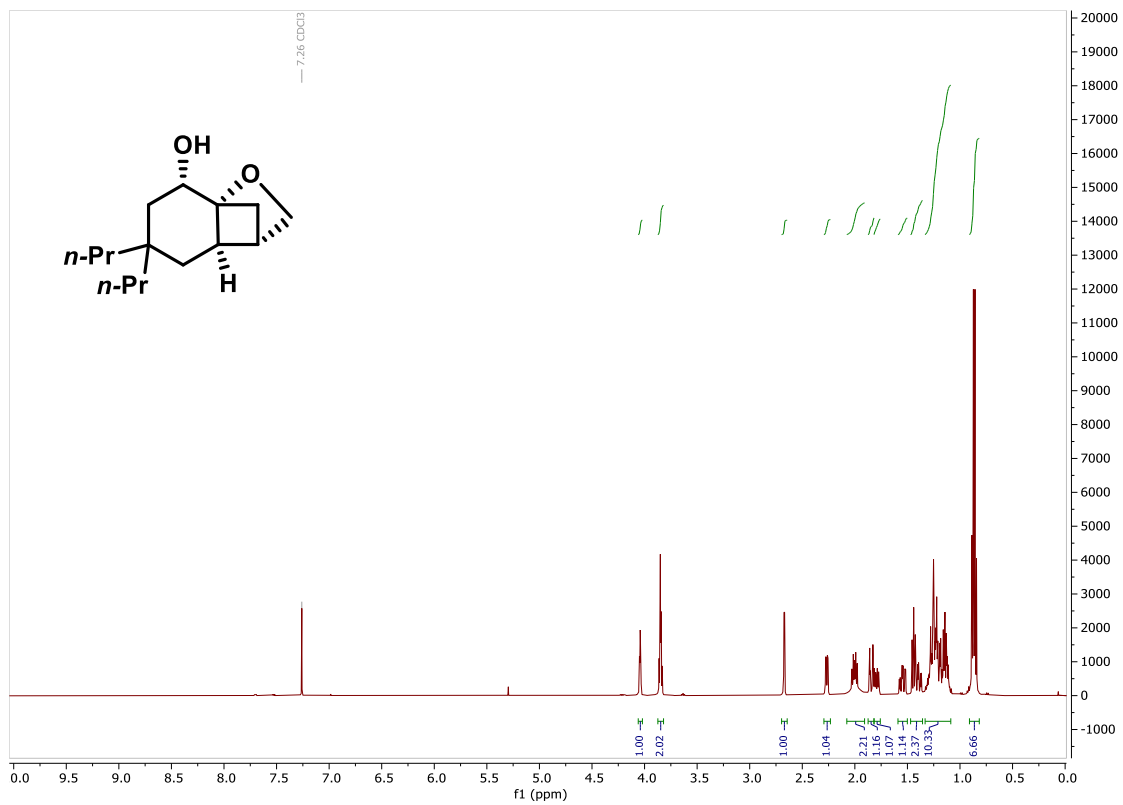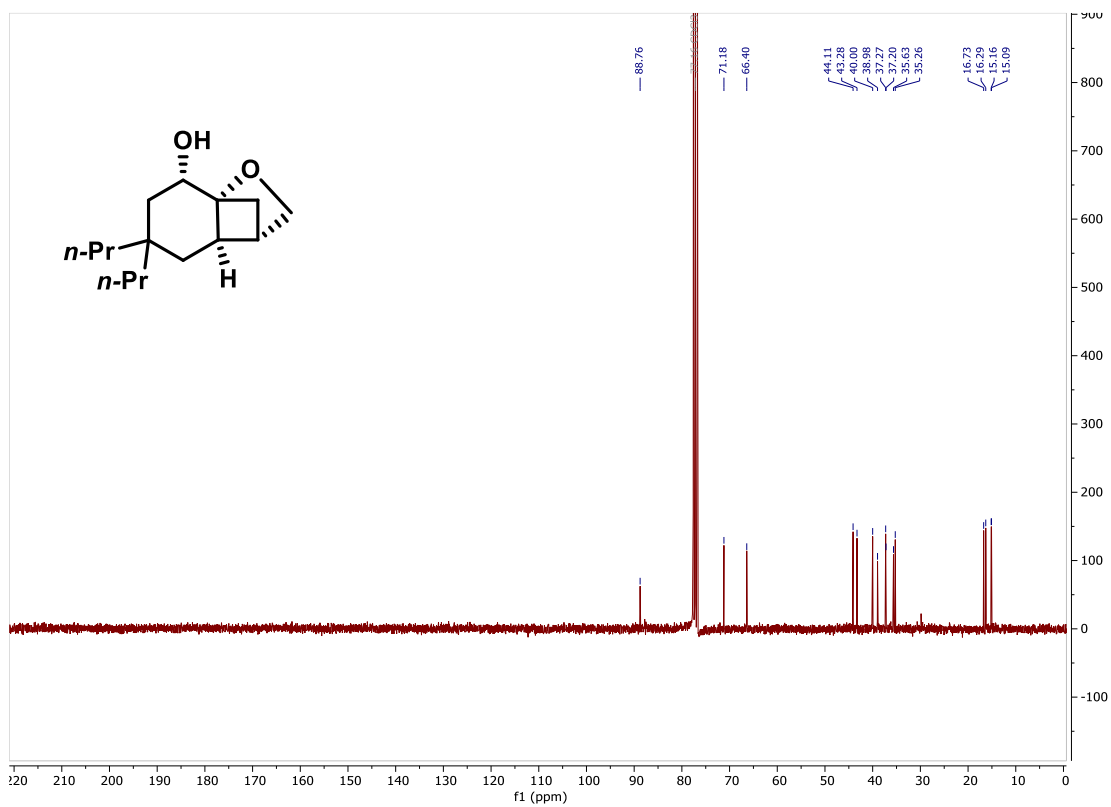

Figure S30: <sup>1</sup>H and <sup>13</sup>C NMR spectra for compound **10a** (500 and 75 MHz, CDCl<sub>3</sub>, 300K).

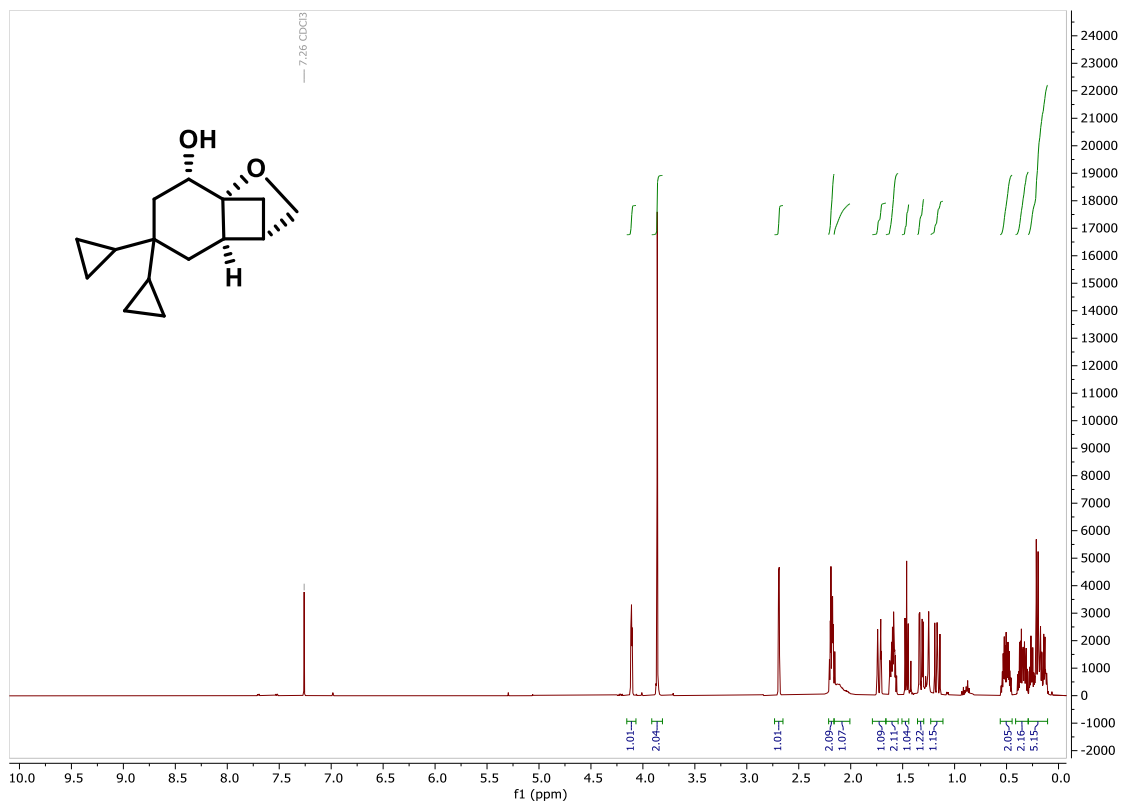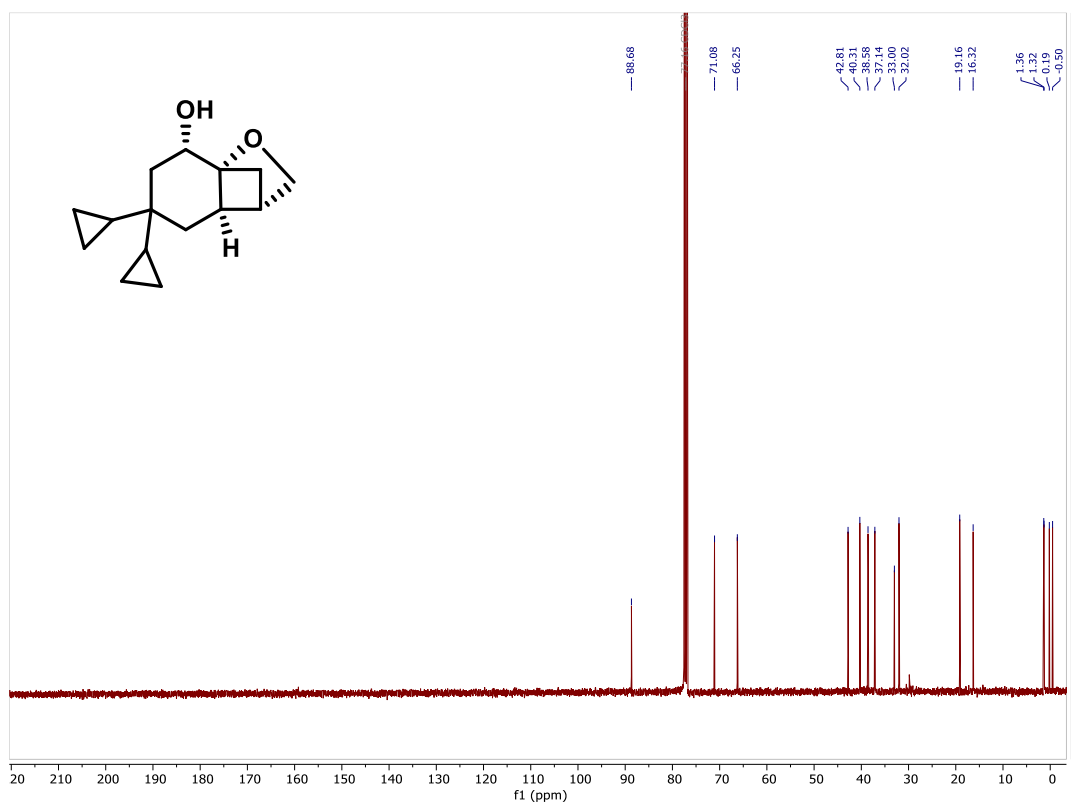

Figure S31:  $^1\text{H}$  and  $^{13}\text{C}$  NMR spectra for compound **10b** (500 and 101 MHz,  $\text{CDCl}_3$ , 300K).

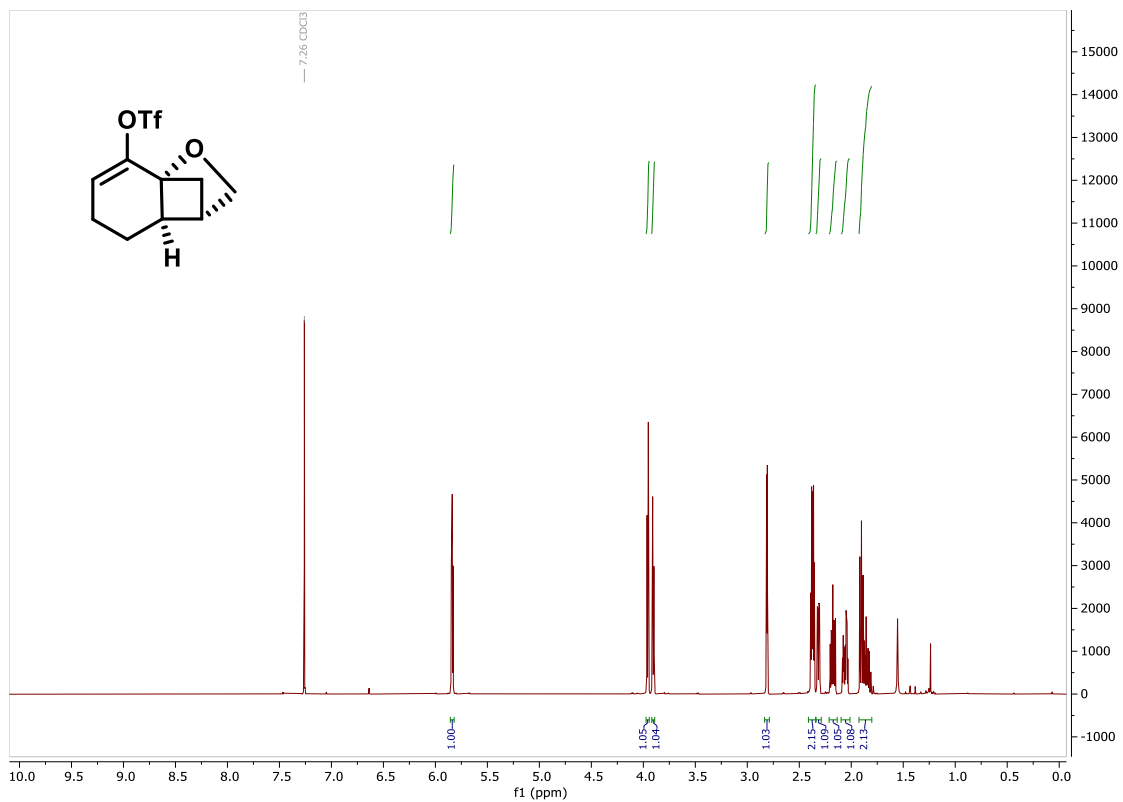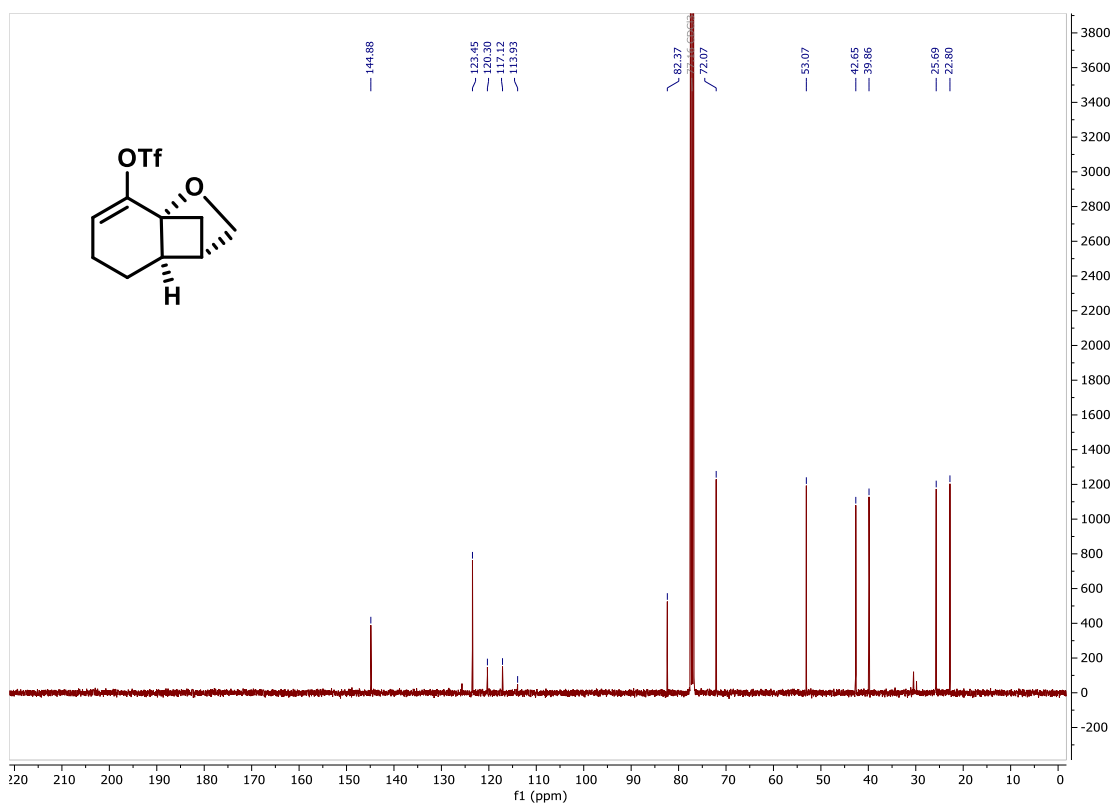

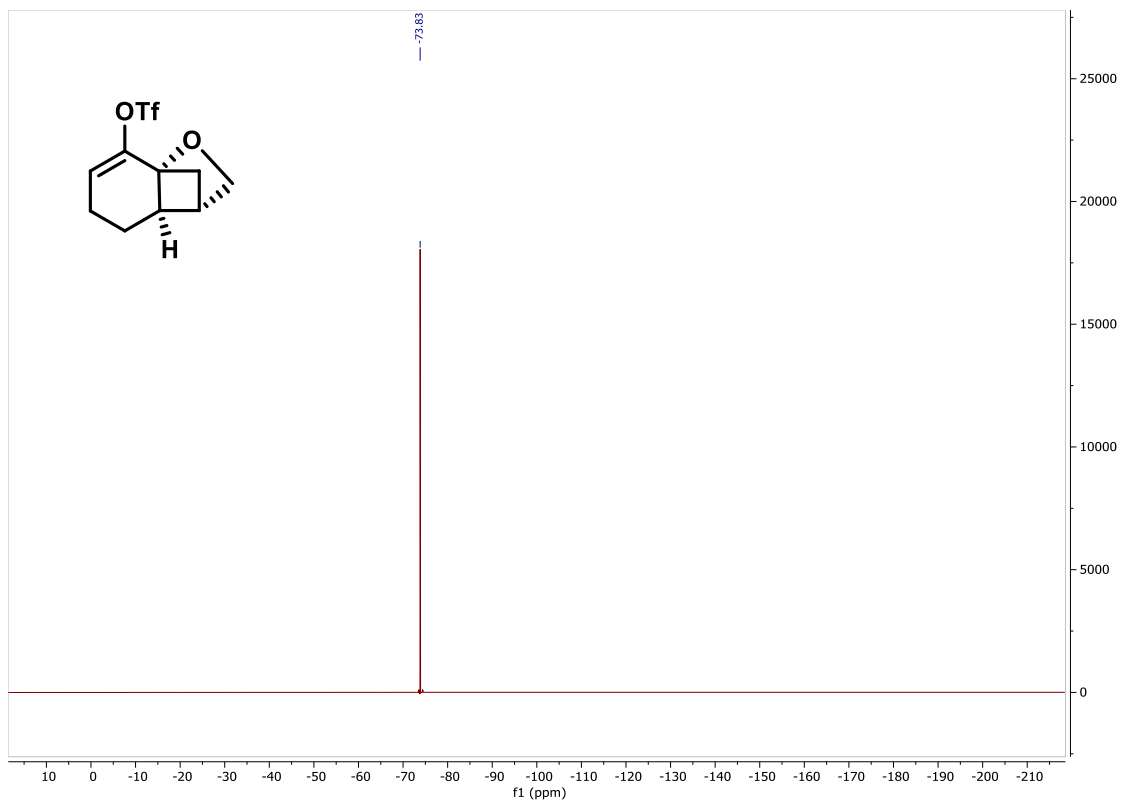

**Figure S32:**  $^1\text{H}$ ,  $^{13}\text{C}$  and  $^{19}\text{F}$  NMR spectra for compound **11** (500, 101 and 376 MHz,  $\text{CDCl}_3$ , 300K).



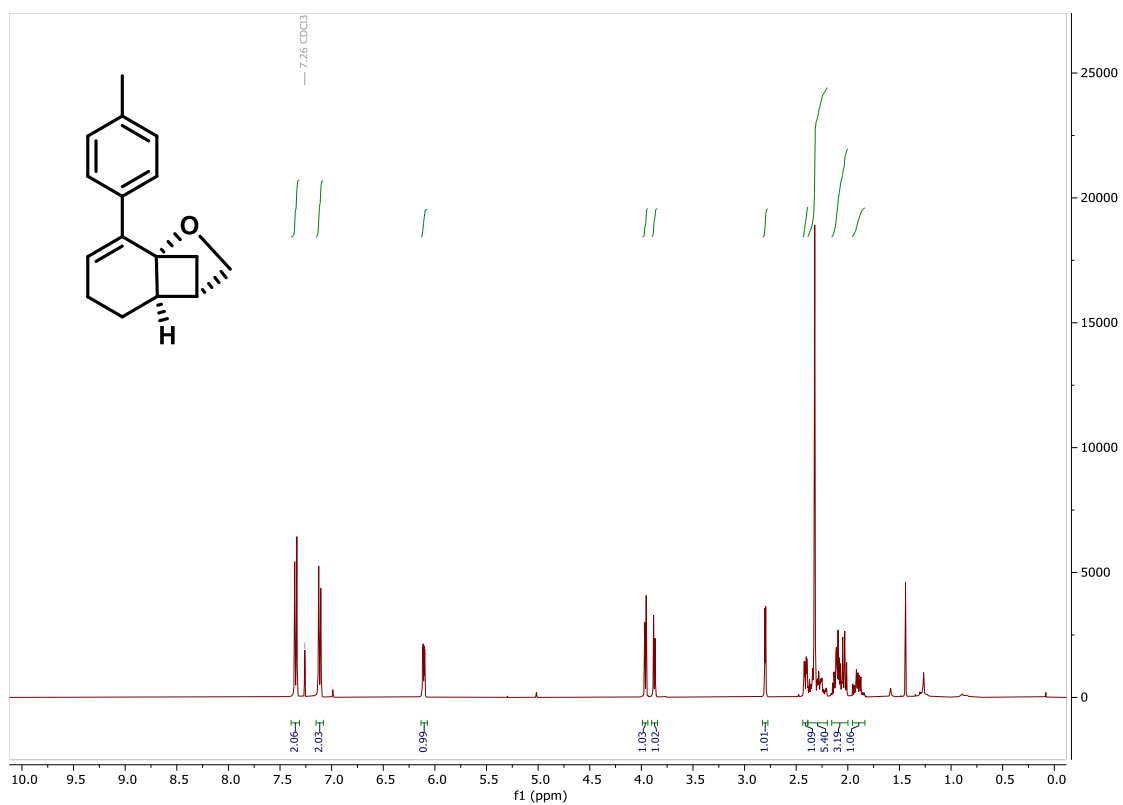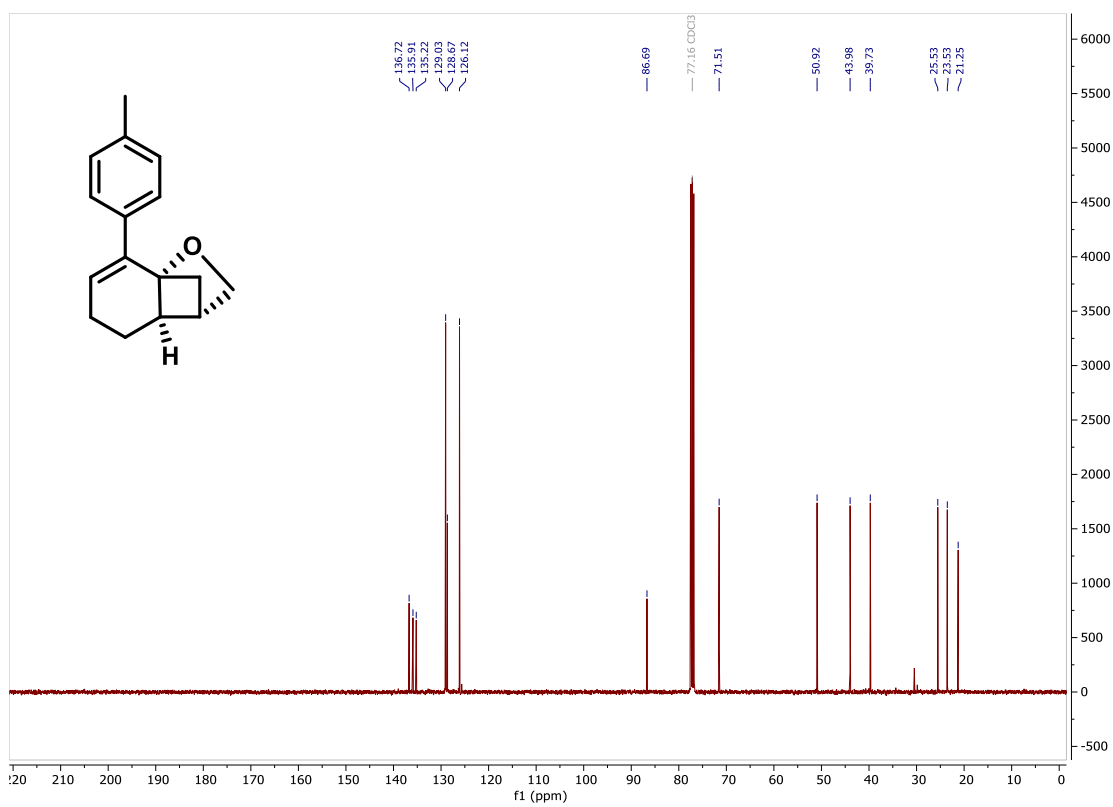

Figure S33: <sup>1</sup>H and <sup>13</sup>C NMR spectra for compound 12 (400 and 101 MHz, CDCl<sub>3</sub>, 300K).

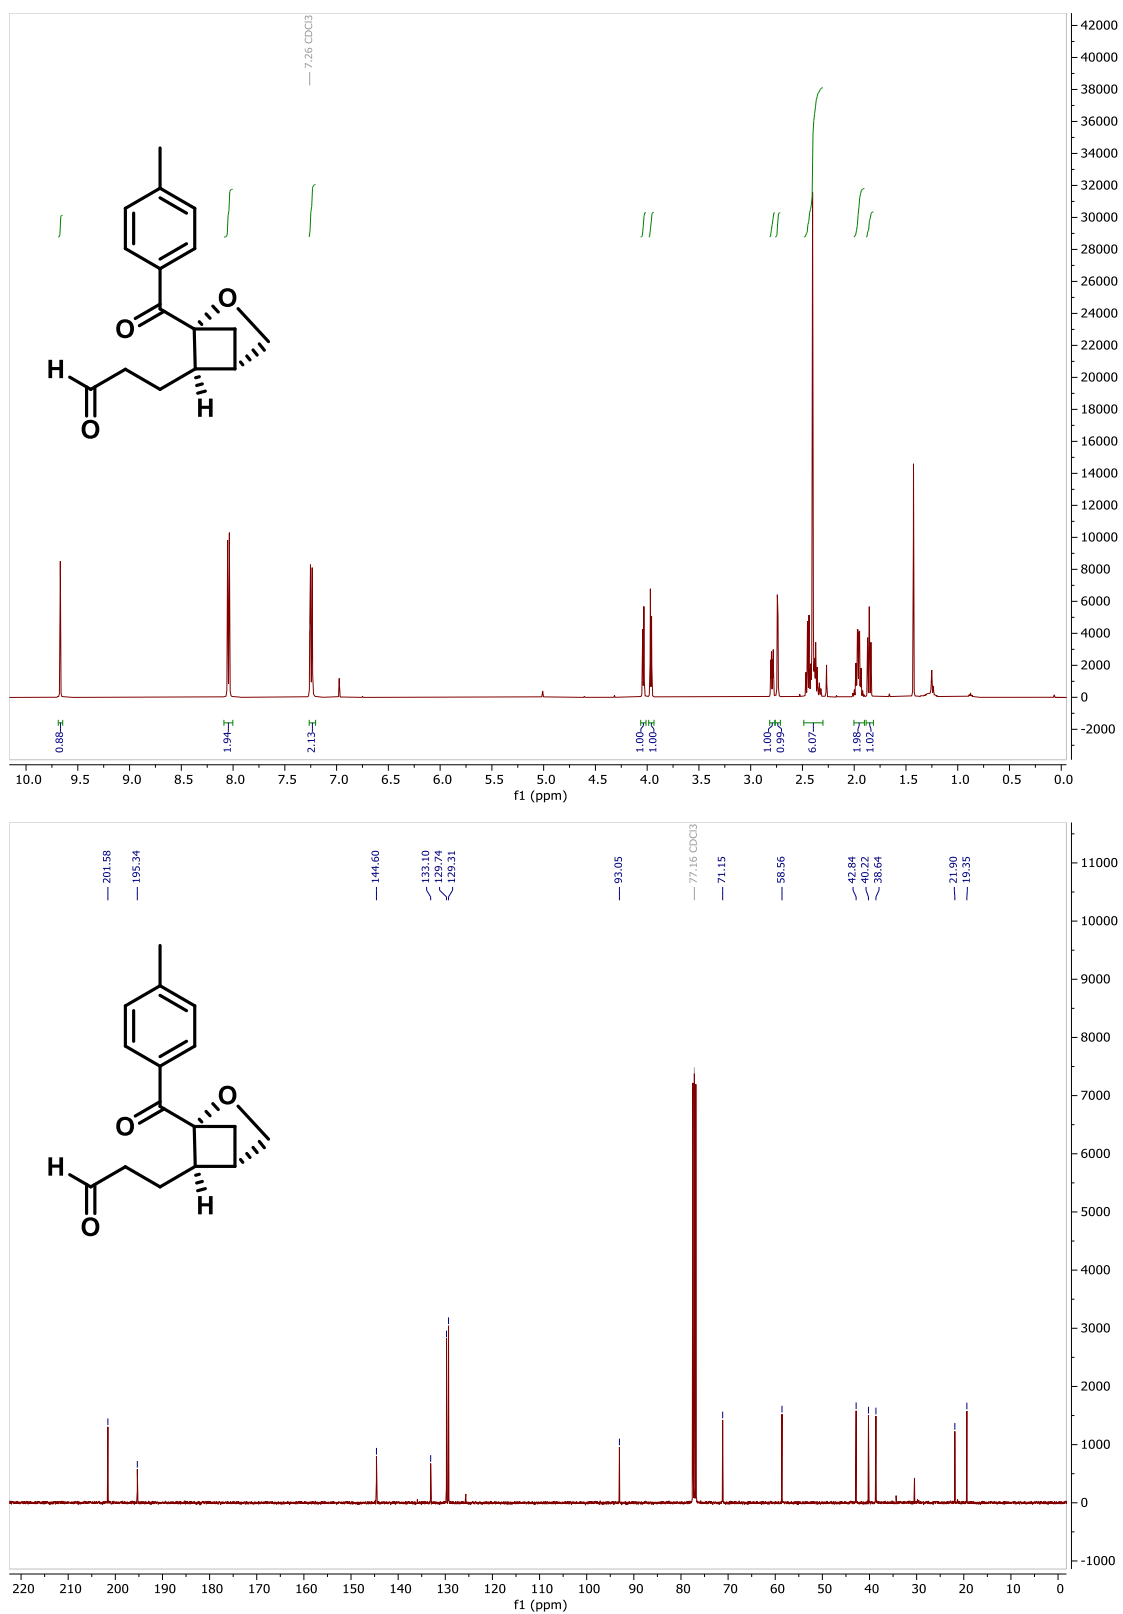

**Figure S34:** <sup>1</sup>H and <sup>13</sup>C NMR spectra for compound **13** (500 and 101 MHz, CDCl<sub>3</sub>, 300K).

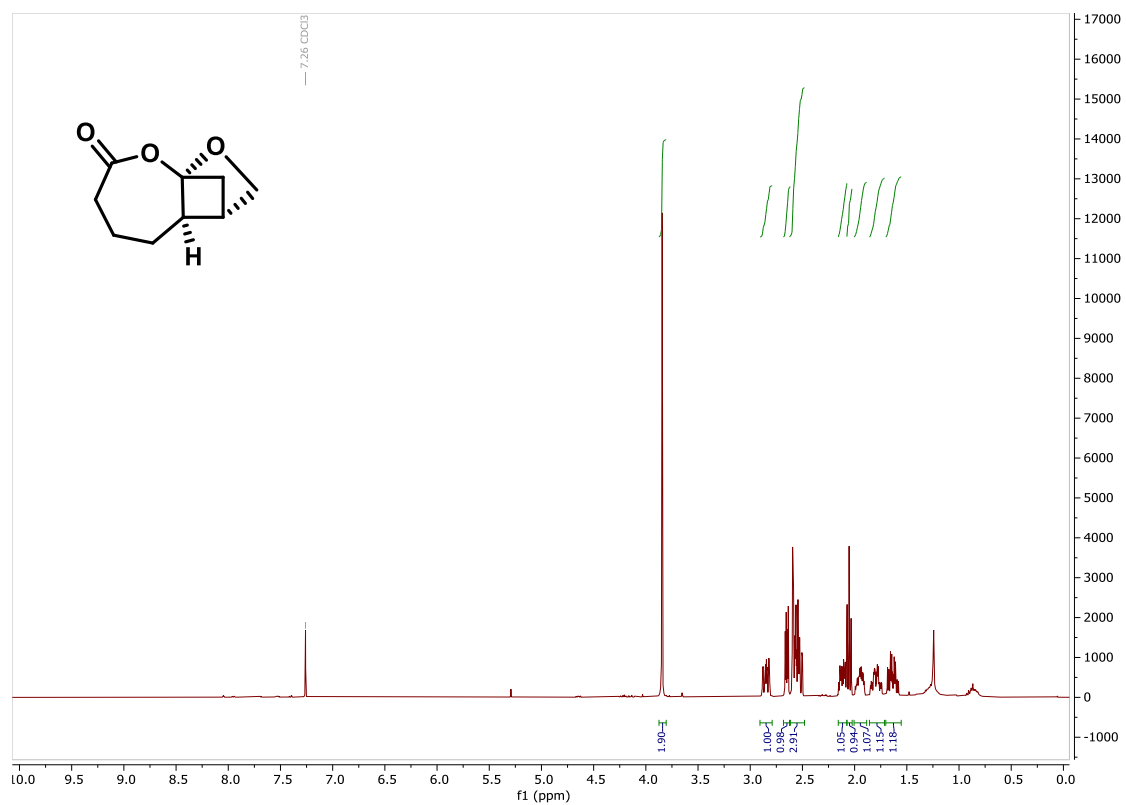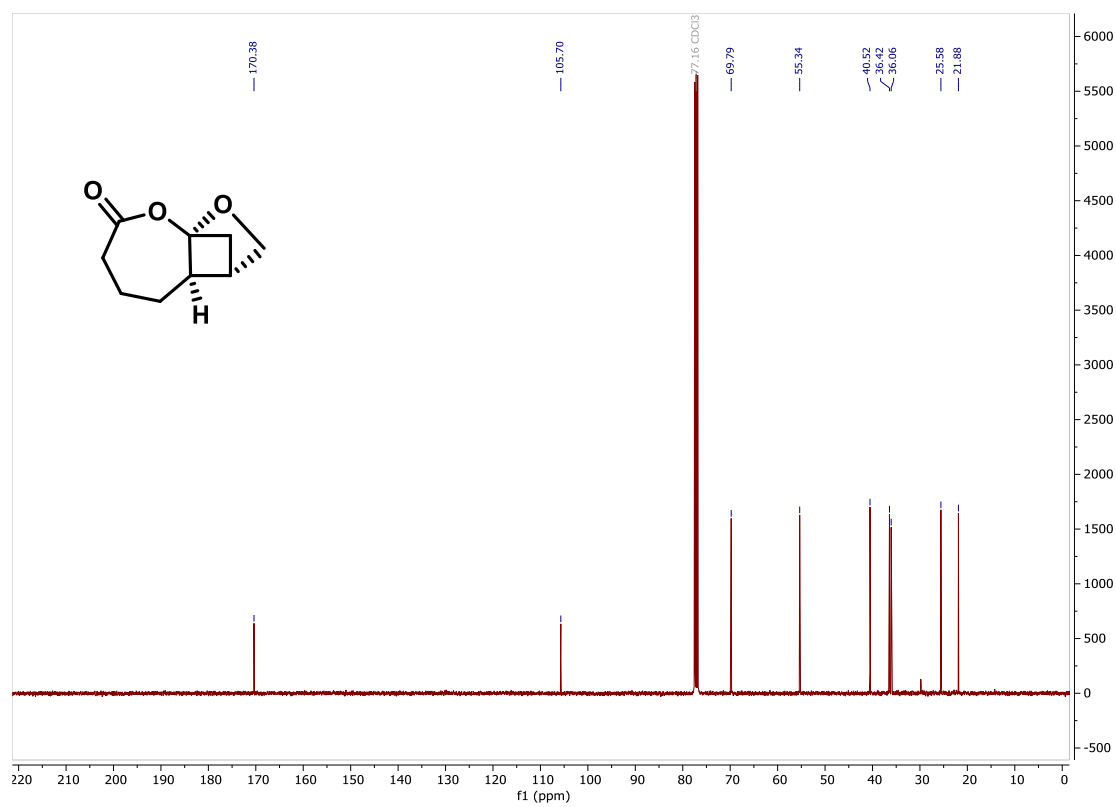

**Figure S35:**  $^1\text{H}$  and  $^{13}\text{C}$  NMR spectra for compound **14** (400 and 101 MHz,  $\text{CDCl}_3$ , 300K).

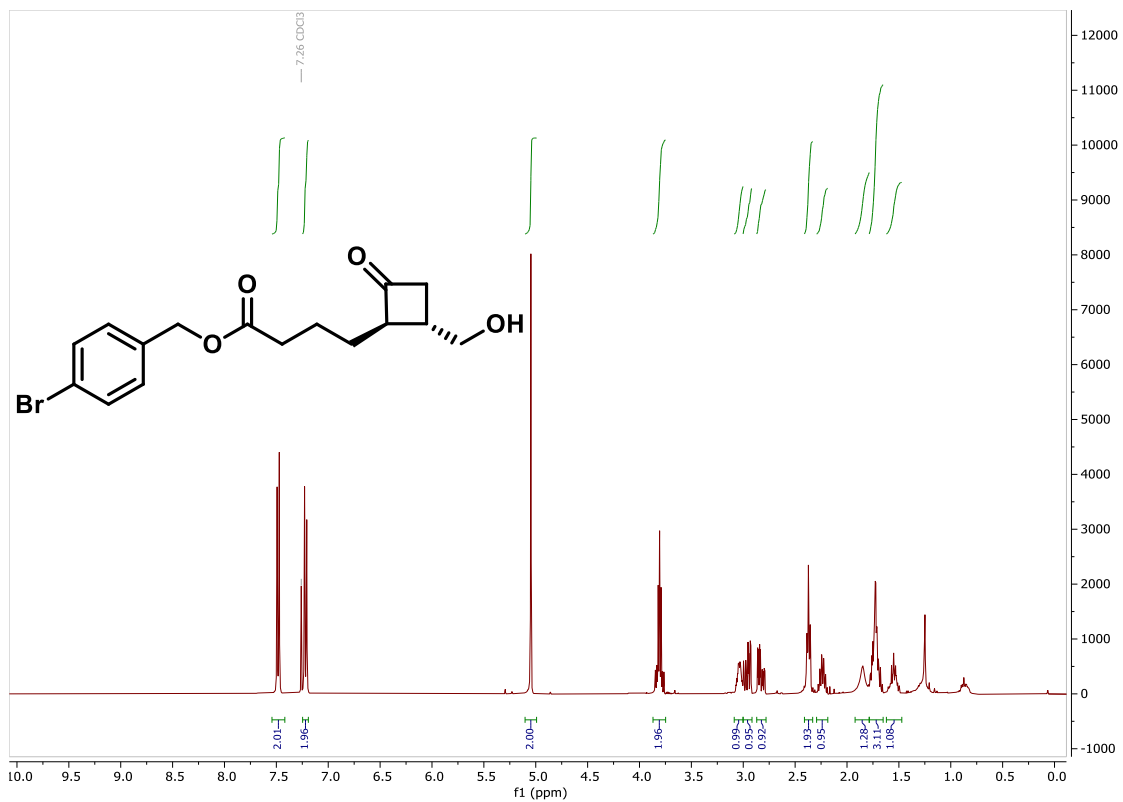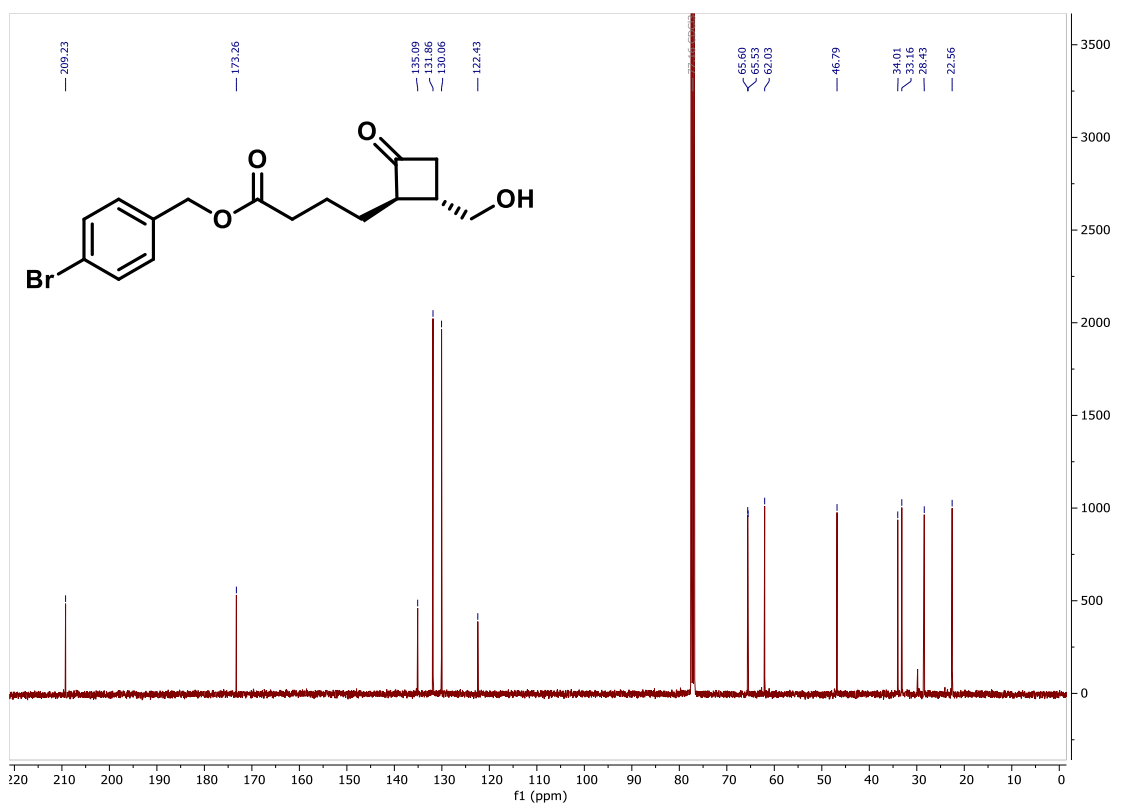

Figure S36: <sup>1</sup>H and <sup>13</sup>C NMR spectra for compound 15 (400 and 101 MHz, CDCl<sub>3</sub>, 300K).

## 11. GC and HPLC Traces

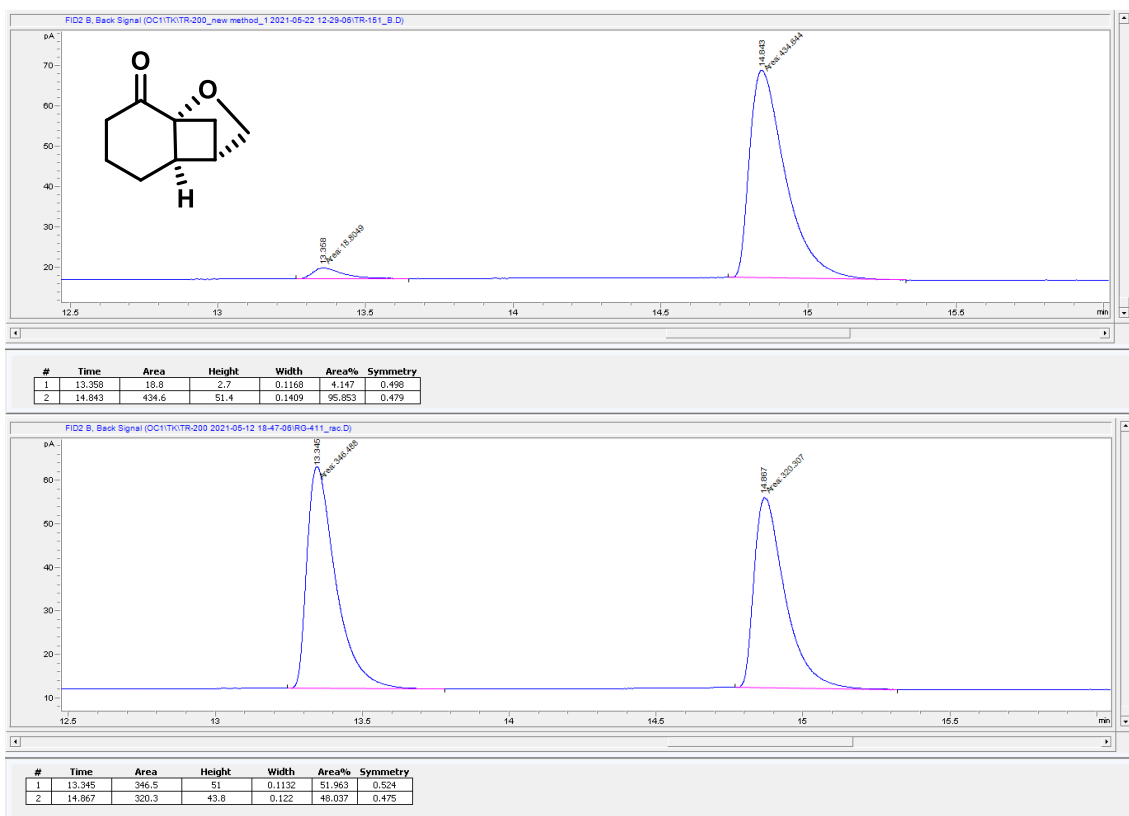

Figure S37: GC chromatograms for compound 5a (enantiomerically enriched and racemic samples).

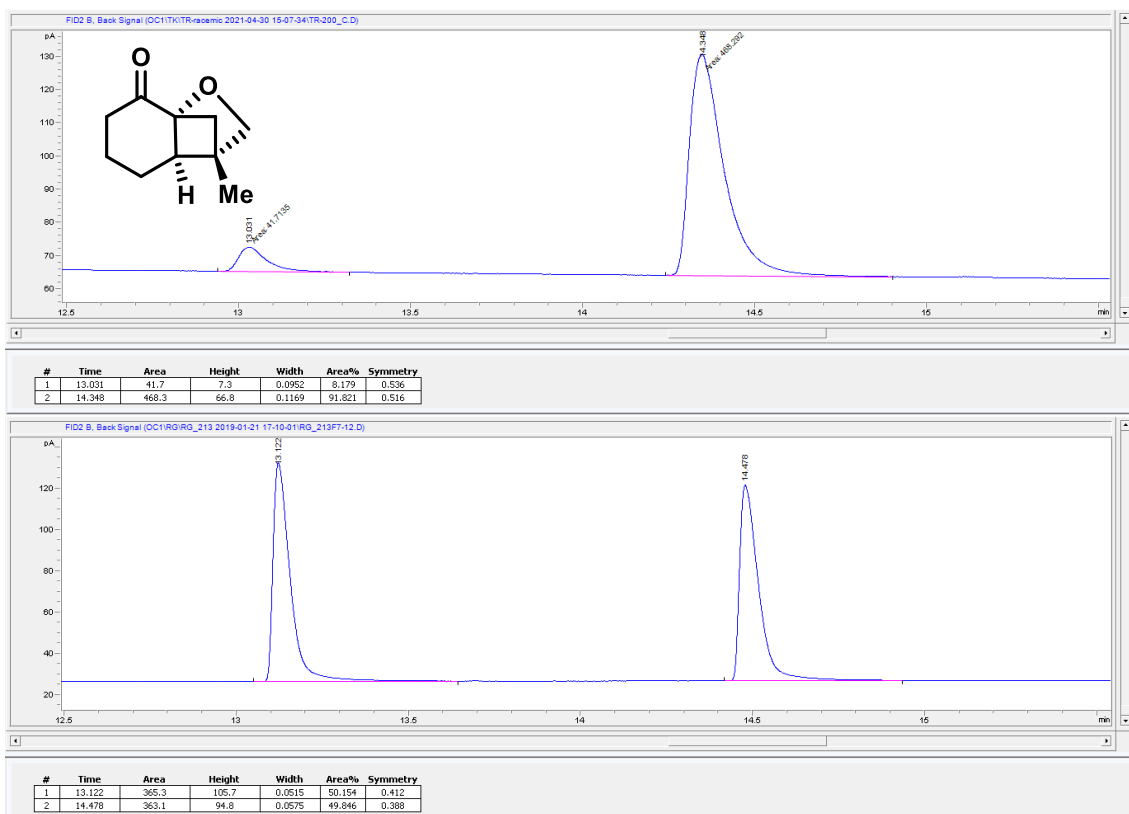

Figure S38: GC chromatograms for compound 5b (enantiomerically enriched and racemic samples).

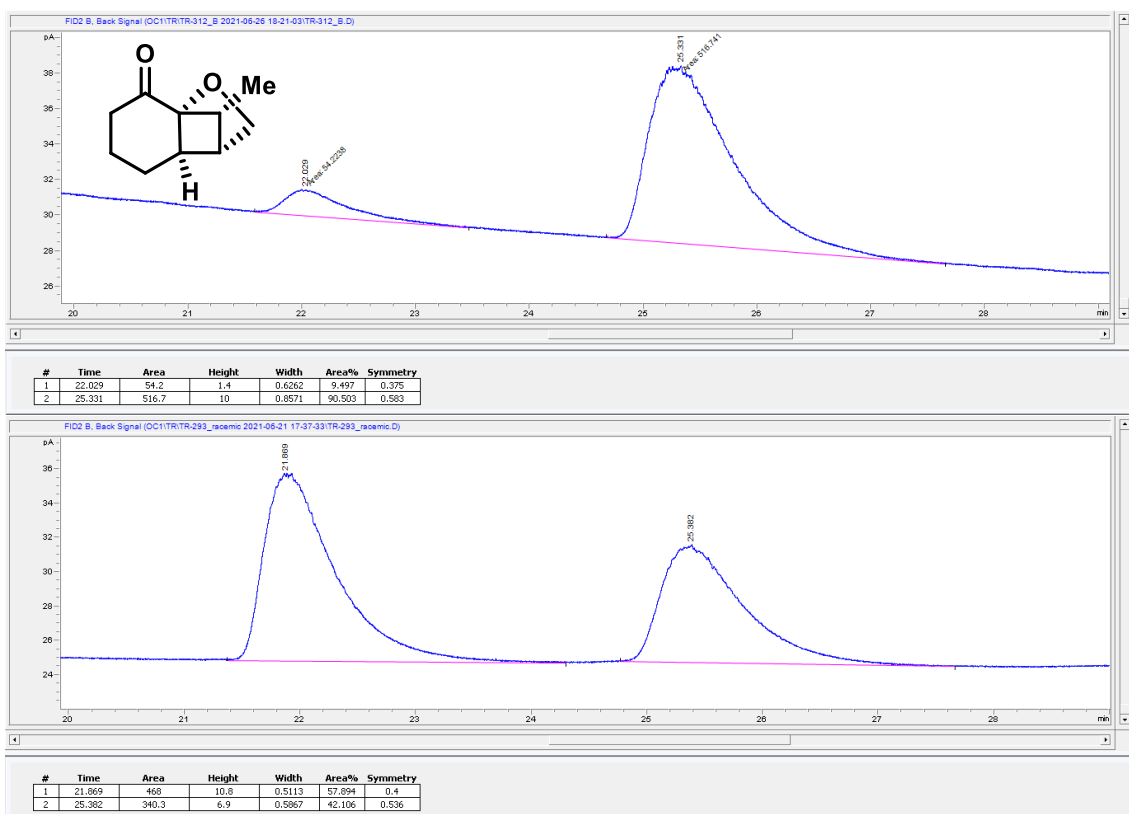

**Figure S39:** GC chromatograms for compound **5c** (enantioenriched and racemic samples).

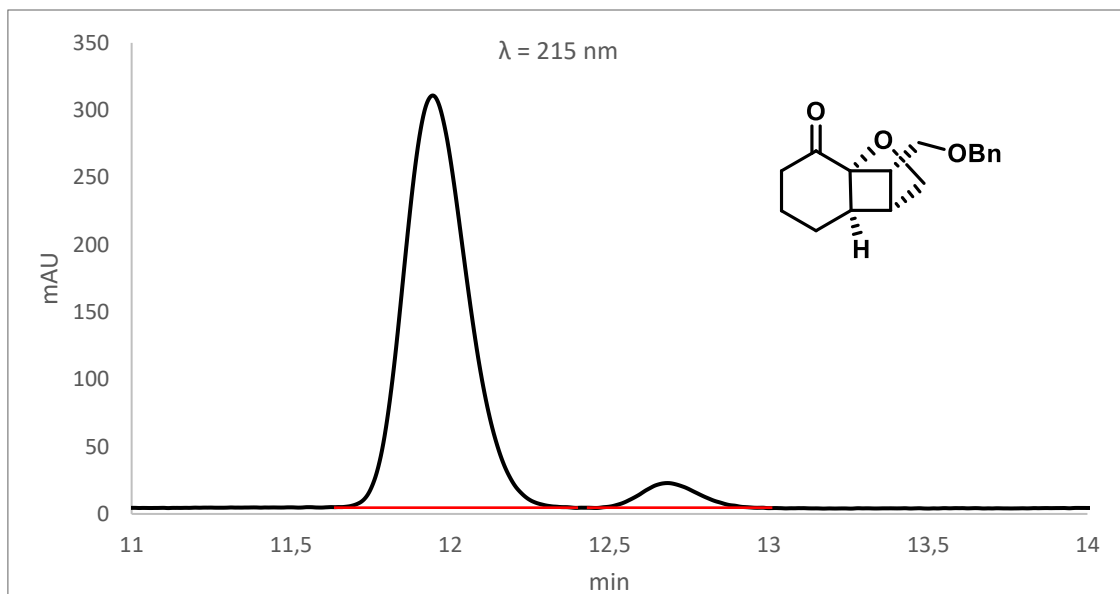

| No.           | Ret.Time<br>min | Peak Name | Height<br>mAU | Area<br>mAU*min | Rel.Area<br>% | Amount | Type |
|---------------|-----------------|-----------|---------------|-----------------|---------------|--------|------|
| 1             | 11,94           | n.a.      | 305,963       | 70,690          | 94,81         | n.a.   | BMB  |
| 2             | 12,68           | n.a.      | 18,339        | 3,867           | 5,19          | n.a.   | BMB* |
| <b>Total:</b> |                 |           | 324,302       | 74,557          | 100,00        | 0,000  |      |

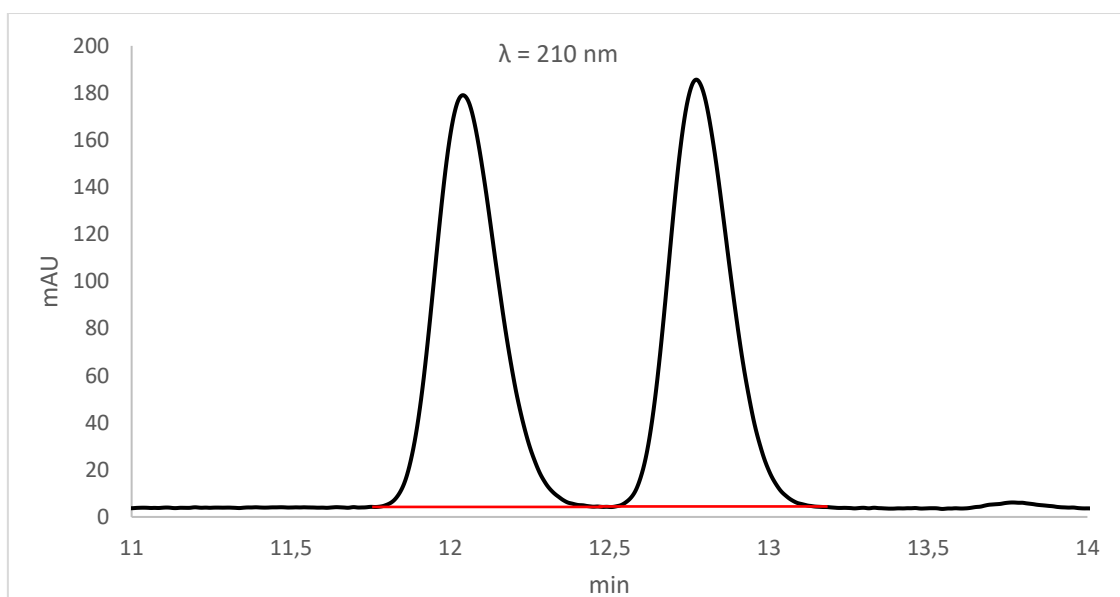

| No.           | Ret.Time<br>min | Peak Name | Height<br>mAU | Area<br>mAU*min | Rel.Area<br>% | Amount | Type |
|---------------|-----------------|-----------|---------------|-----------------|---------------|--------|------|
| 1             | 12,04           | n.a.      | 174,902       | 40,644          | 49,93         | n.a.   | BM   |
| 2             | 12,77           | n.a.      | 181,689       | 40,763          | 50,07         | n.a.   | MB   |
| <b>Total:</b> |                 |           | 356,590       | 81,407          | 100,00        | 0,000  |      |

Figure S40: HPLC chromatograms for compound **5d** (enantiomerized and racemic samples).

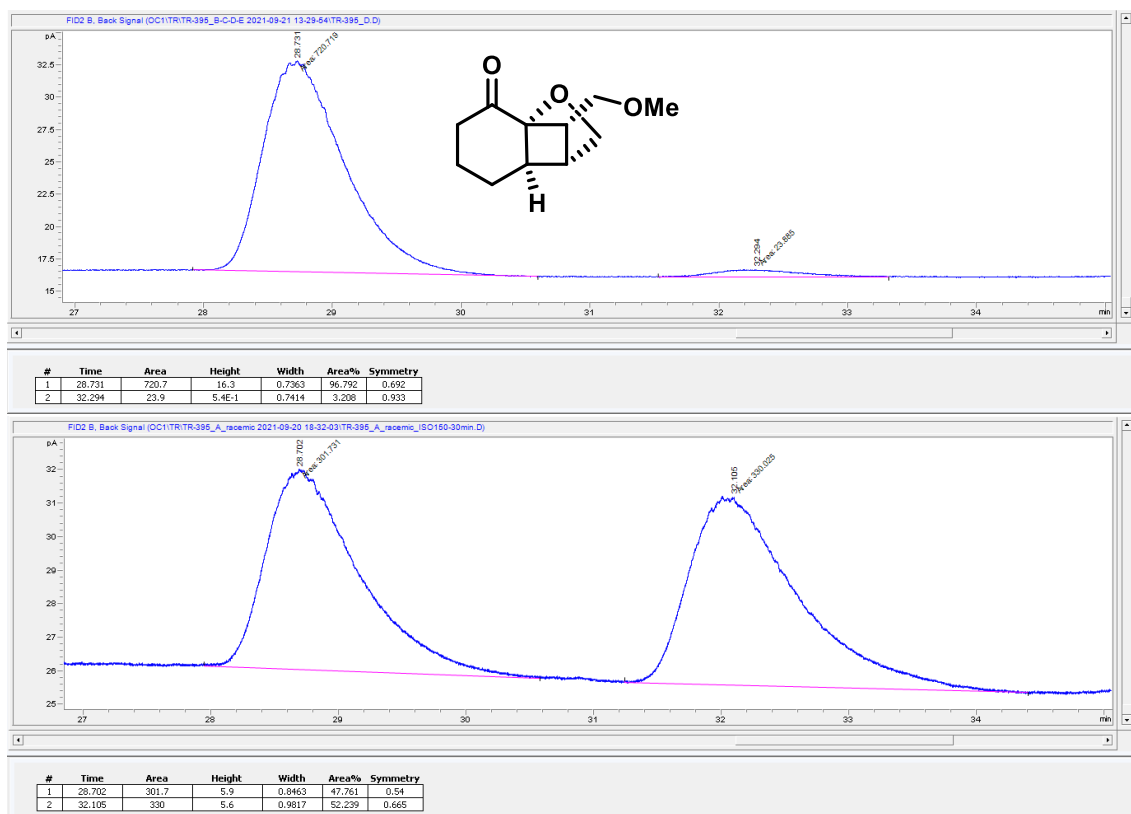

Figure S41: GC chromatograms for compound 5e (enantioenriched and racemic samples).



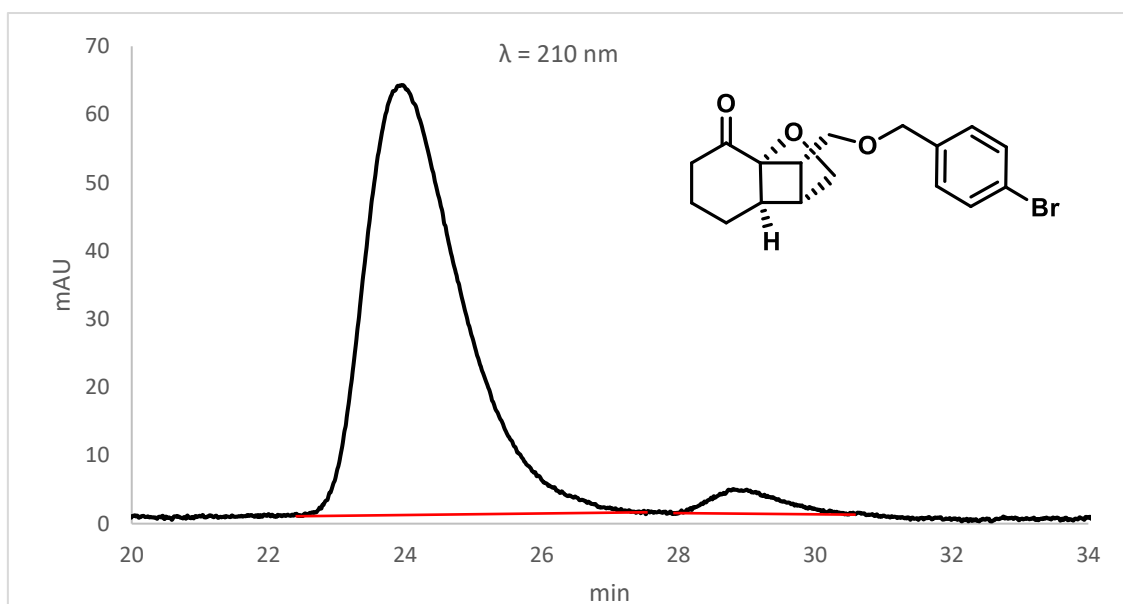

| No.           | Ret.Time min | Peak Name | Height mAU | Area mAU*min | Rel.Area % | Amount | Type |
|---------------|--------------|-----------|------------|--------------|------------|--------|------|
| 1             | 23.96        | n.a.      | 62,880     | 102,154      | 95,88      | n.a.   | BMB* |
| 2             | 28.81        | n.a.      | 3,618      | 4,391        | 4,12       | n.a.   | BMB* |
| <b>Total:</b> |              |           | 66,498     | 106,545      | 100,00     | 0,000  |      |

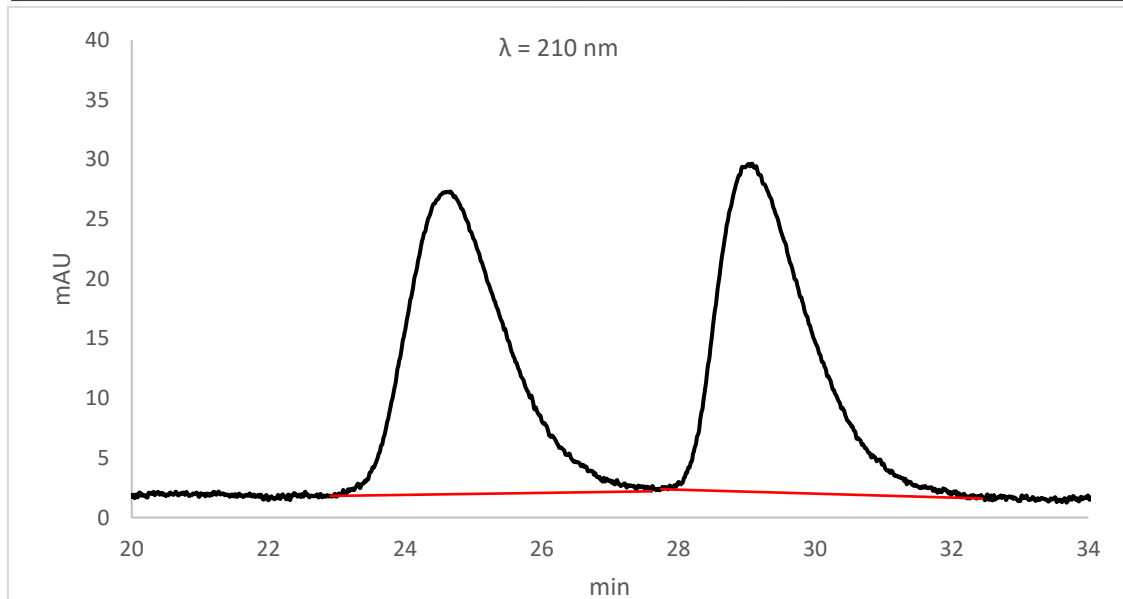

| No.           | Ret.Time min | Peak Name | Height mAU | Area mAU*min | Rel.Area % | Amount | Type |
|---------------|--------------|-----------|------------|--------------|------------|--------|------|
| 1             | 24.66        | n.a.      | 25,380     | 42,510       | 49,55      | n.a.   | BMB* |
| 2             | 29.07        | n.a.      | 27,570     | 43,287       | 50,45      | n.a.   | BMB* |
| <b>Total:</b> |              |           | 52,950     | 85,797       | 100,00     | 0,000  |      |

Figure S42: HPLC chromatograms for compound **5f** (enantiomerically enriched and racemic samples).

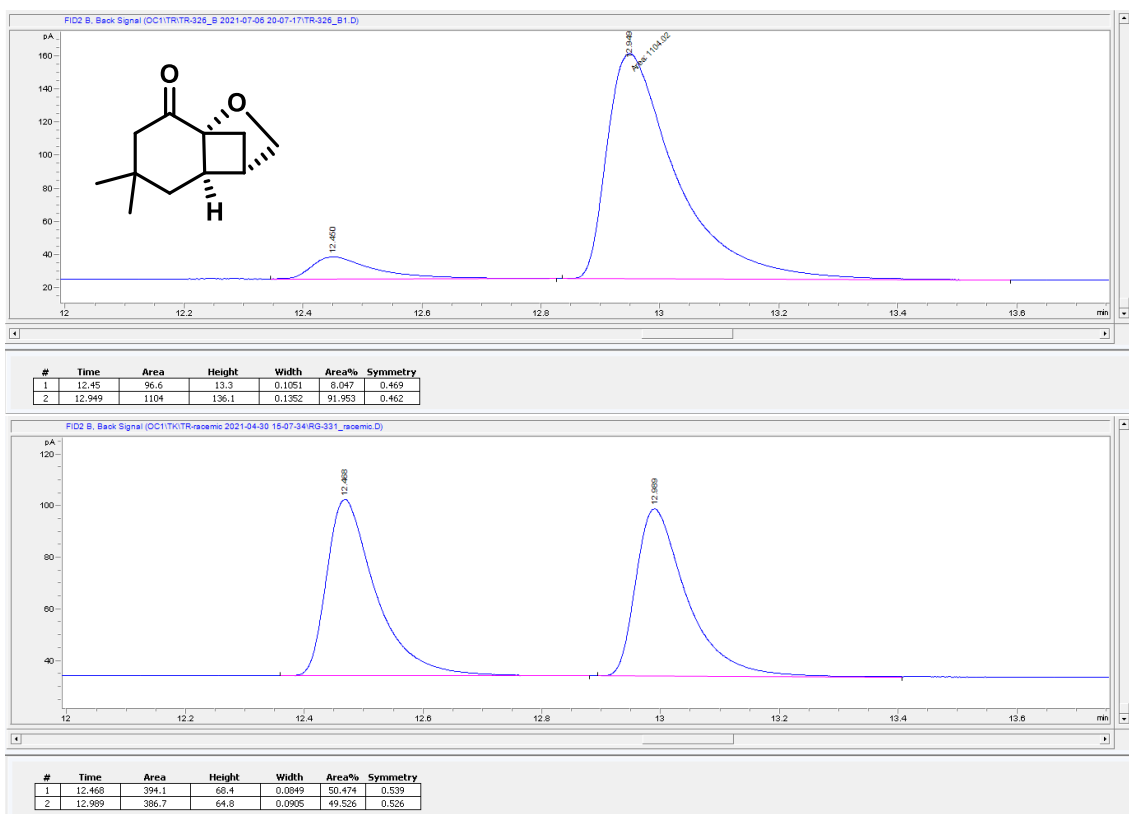

Figure S43: GC chromatograms for compound 5g (enantiomerically enriched and racemic samples).

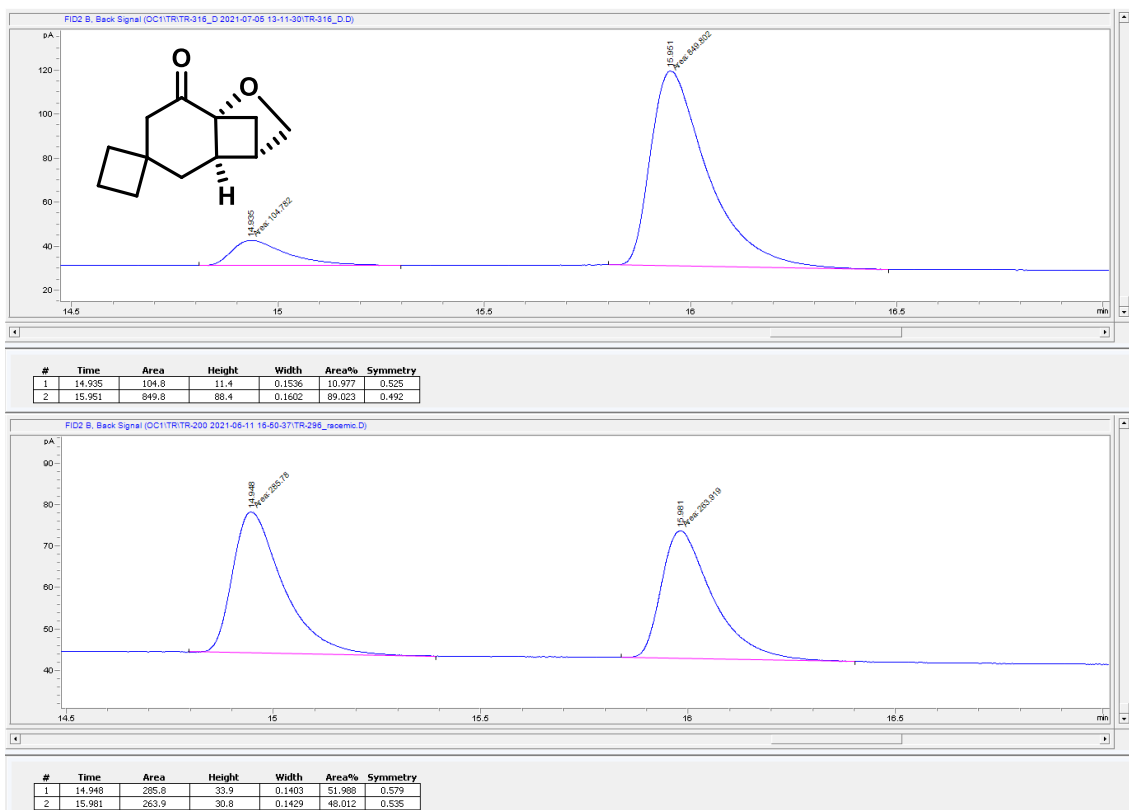

Figure S44: GC chromatograms for compound 5h (enantiomerically enriched and racemic samples).

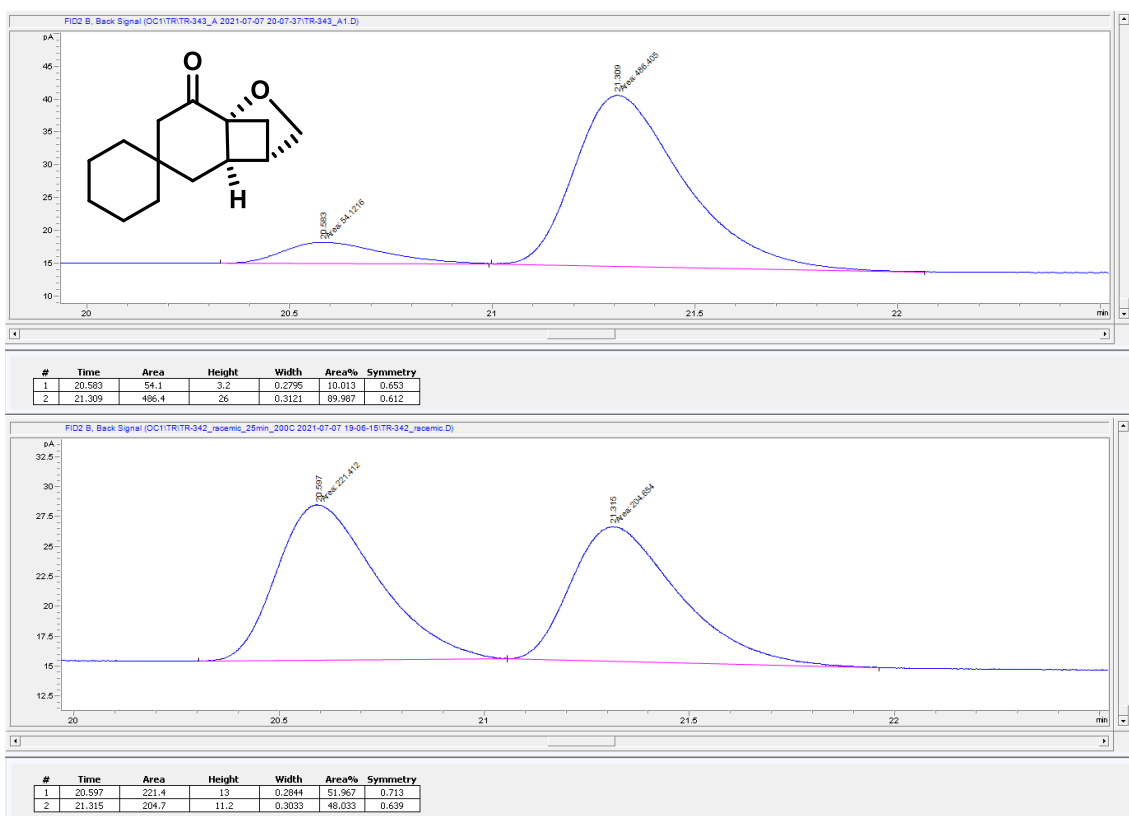

Figure S45: GC chromatograms for compound 5i (enantioenriched and racemic samples).

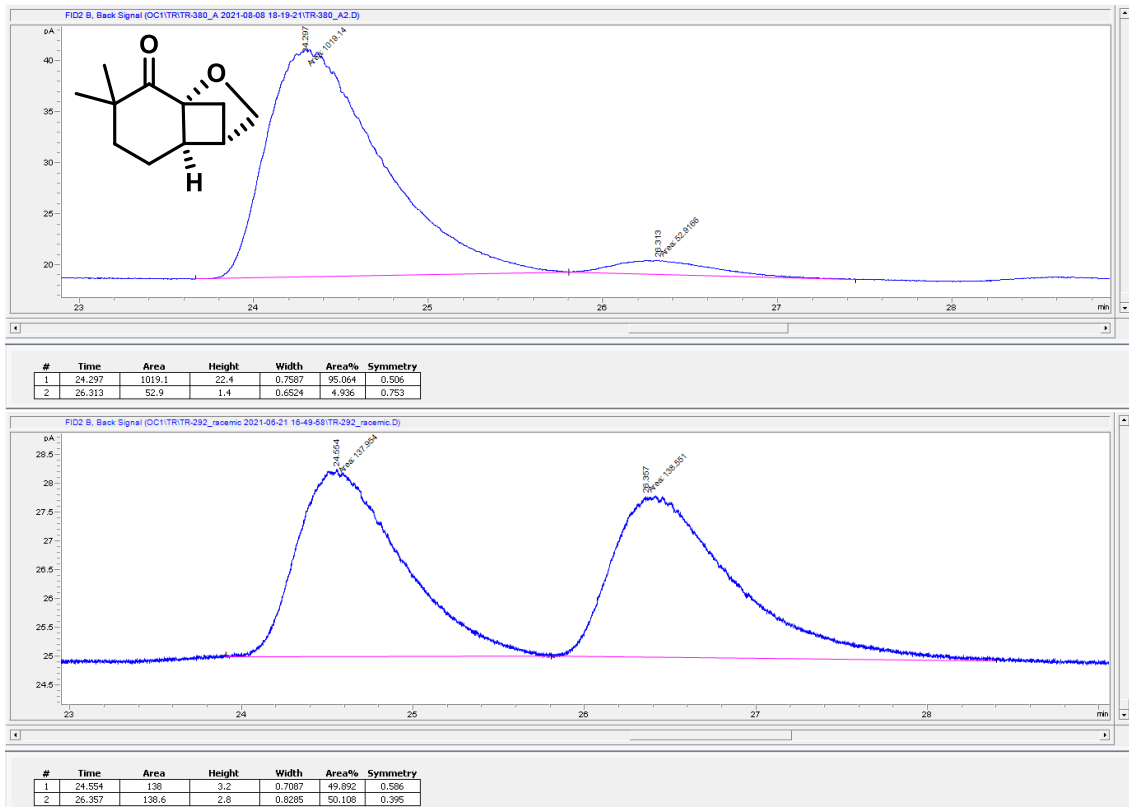

Figure S46: GC chromatograms for compound 5l (enantioenriched and racemic samples).

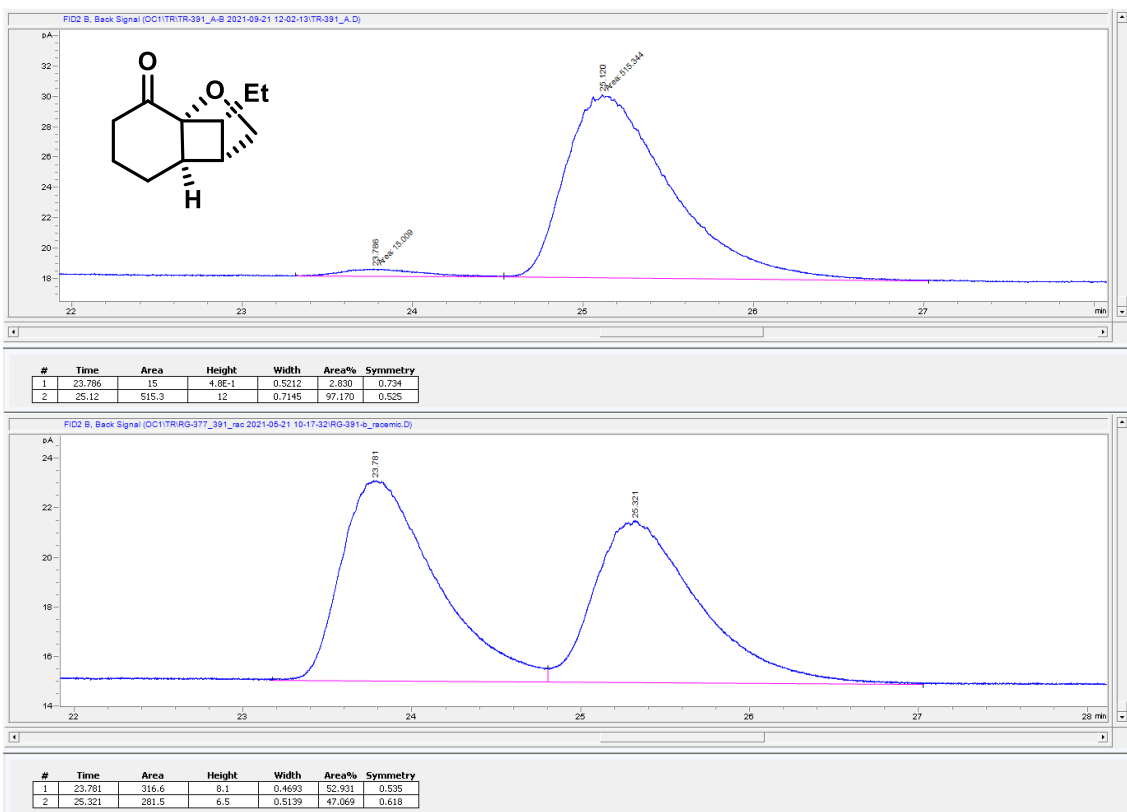

Figure S47: GC chromatograms for compound 5m (enantioenriched and racemic samples).

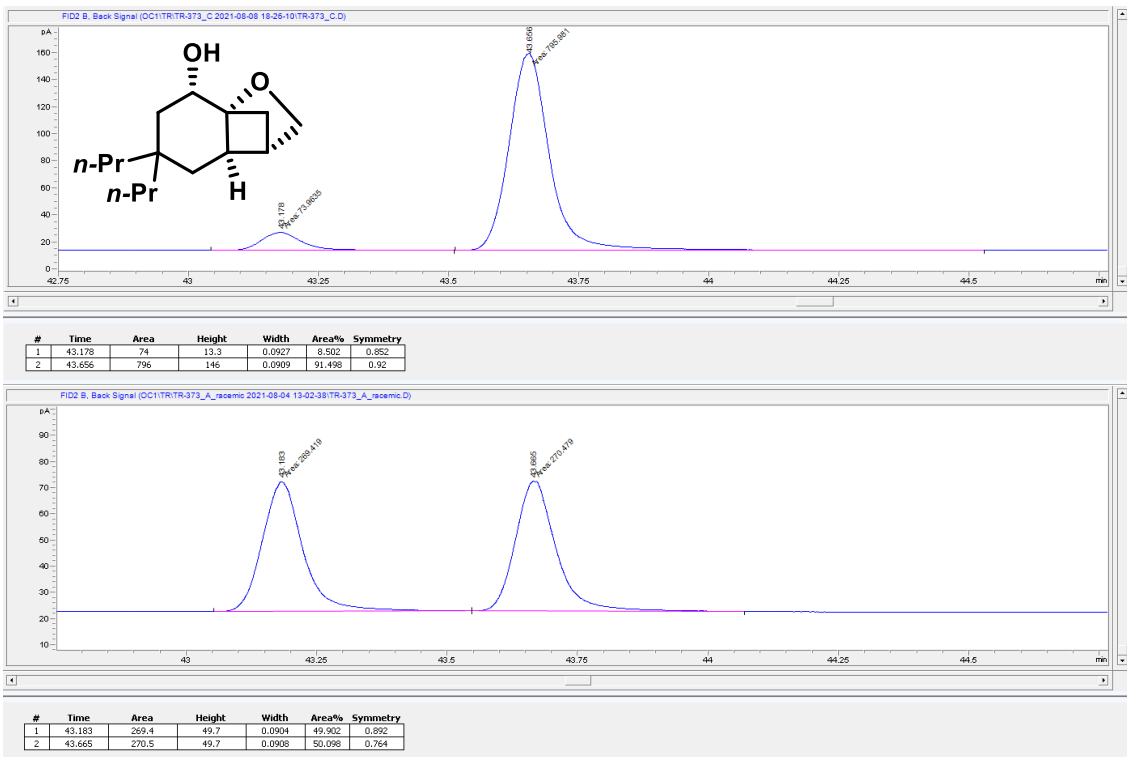

Figure S48: GC chromatograms for compound 10a (enantioenriched and racemic samples).

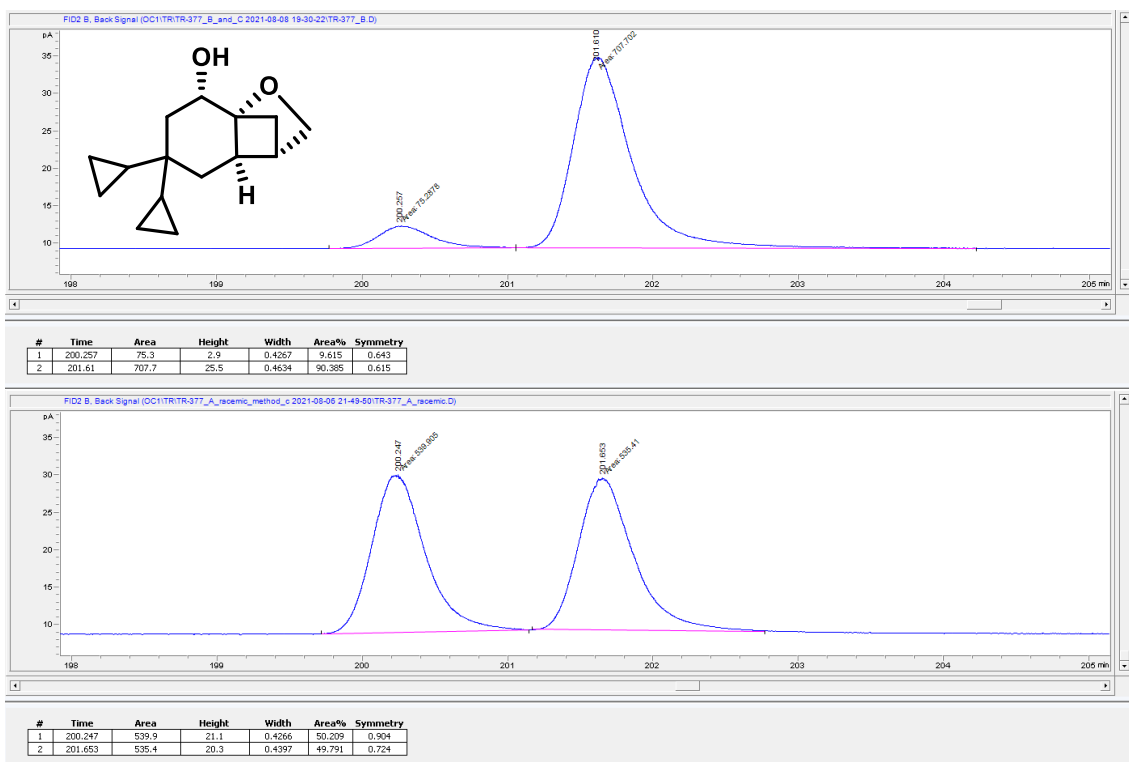

**Figure S49:** GC chromatograms for compound **10b** (enantioenriched and racemic samples).

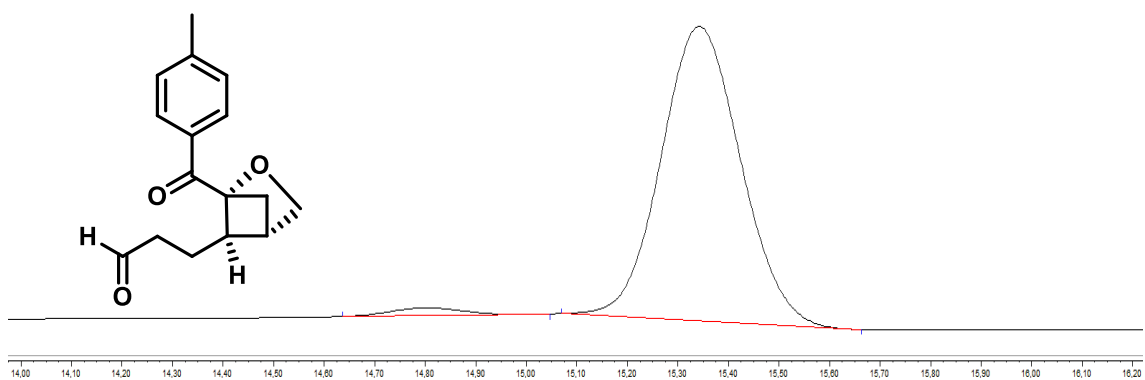

| No.           | Ret.Time<br>min | Peak Name | Height<br>mAU | Area<br>mAU*min | Rel.Area<br>% | Amount | Type |
|---------------|-----------------|-----------|---------------|-----------------|---------------|--------|------|
| 1             | 14.80           | n.a.      | 9,310         | 1,499           | 2,26          | n.a.   | BMB* |
| 2             | 15.34           | n.a.      | 356,240       | 64,875          | 97,74         | n.a.   | BMB* |
| <b>Total:</b> |                 |           | 365,550       | 66,374          | 100,00        | 0,000  |      |

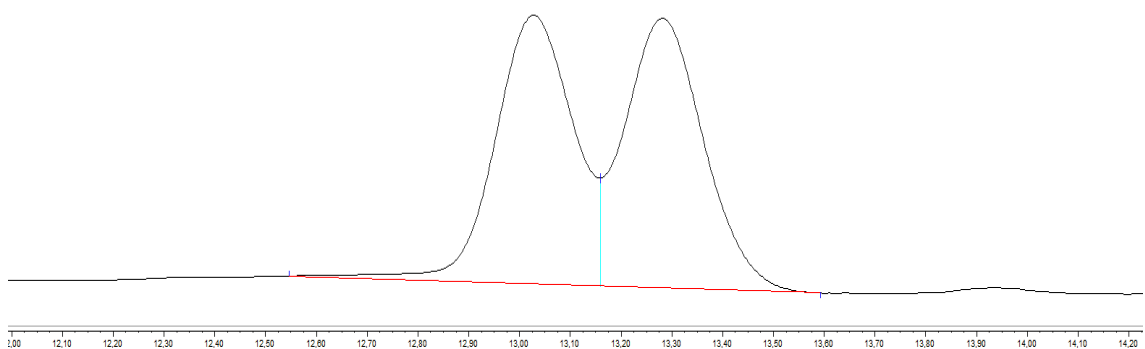

| No.           | Ret.Time<br>min | Peak Name | Height<br>mAU | Area<br>mAU*min | Rel.Area<br>% | Amount | Type |
|---------------|-----------------|-----------|---------------|-----------------|---------------|--------|------|
| 1             | 13.03           | n.a.      | 125,305       | 22,512          | 49,65         | n.a.   | BM   |
| 2             | 13.28           | n.a.      | 125,725       | 22,827          | 50,35         | n.a.   | MB   |
| <b>Total:</b> |                 |           | 251,031       | 45,339          | 100,00        | 0,000  |      |

Figure S50: HPLC chromatograms for compound 13 (enantiomerized and racemic samples).

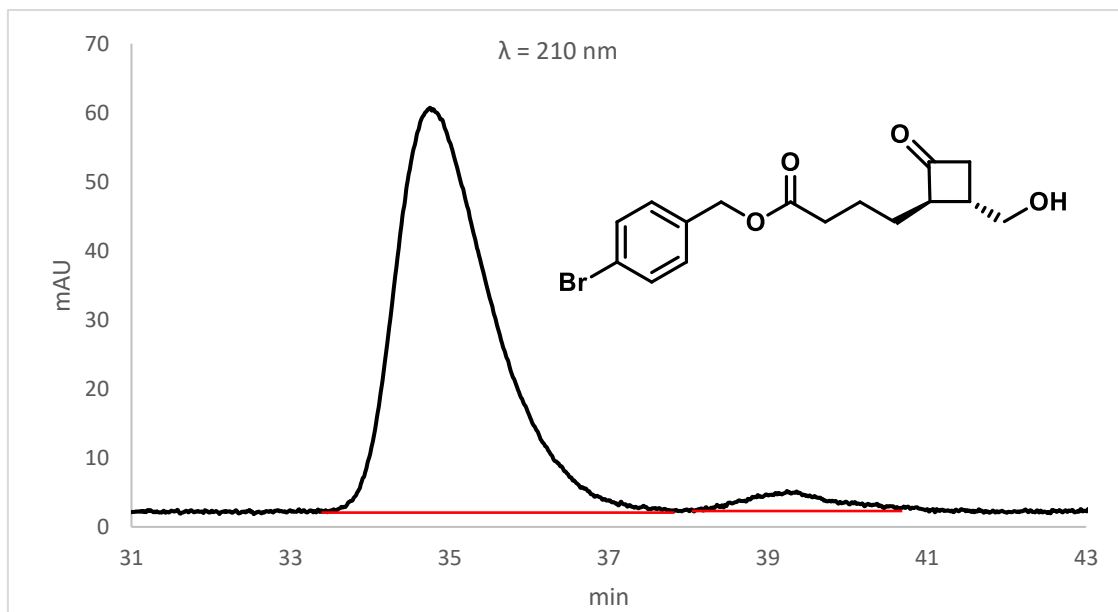

| No.           | Ret.Time<br>min | Peak Name | Height<br>mAU | Area<br>mAU*min | Rel.Area<br>% | Amount | Type |
|---------------|-----------------|-----------|---------------|-----------------|---------------|--------|------|
| 1             | 34.76           | n.a.      | 58,482        | 81,774          | 96,21         | n.a.   | BMB* |
| 2             | 39.24           | n.a.      | 2,731         | 3,218           | 3,79          | n.a.   | BMB* |
| <b>Total:</b> |                 |           | 61,213        | 84,992          | 100,00        | 0,000  |      |

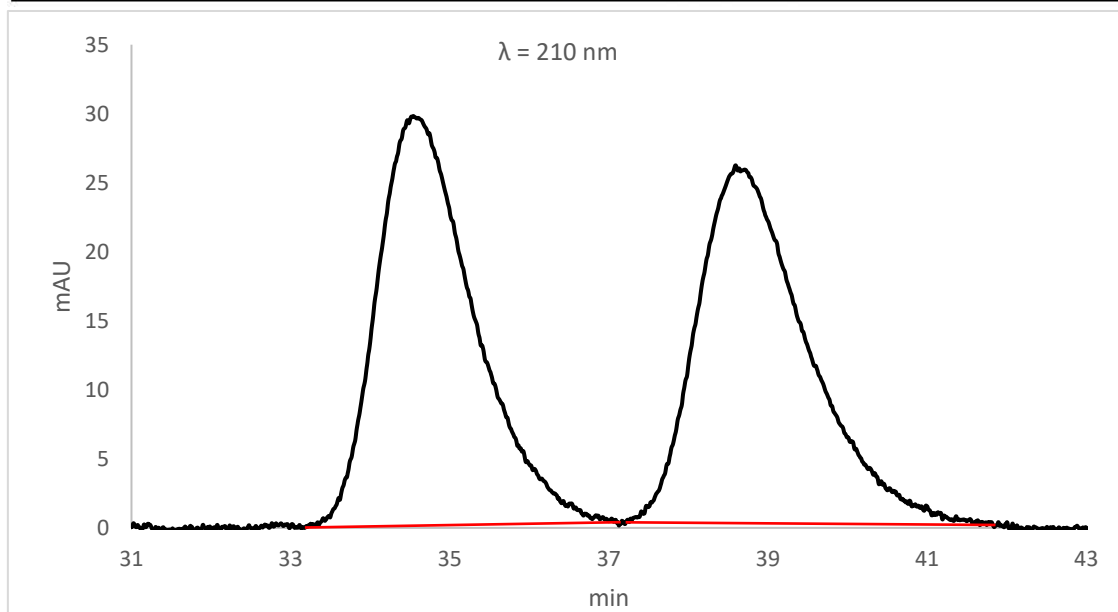

| No.           | Ret.Time<br>min | Peak Name | Height<br>mAU | Area<br>mAU*min | Rel.Area<br>% | Amount | Type |
|---------------|-----------------|-----------|---------------|-----------------|---------------|--------|------|
| 1             | 34.54           | n.a.      | 29,672        | 42,041          | 50,43         | n.a.   | BMB* |
| 2             | 38.59           | n.a.      | 25,938        | 41,324          | 49,57         | n.a.   | BMB* |
| <b>Total:</b> |                 |           | 55,610        | 83,365          | 100,00        | 0,000  |      |

Figure S51: HPLC chromatograms for compound 15 (enantiomerically enriched and racemic samples).

## 12. Absolute Configuration Determination by X-ray Analysis

Data were collected on a Bruker D8 Venture single crystal X-ray diffractometer equipped with a CMOS detector (Bruker Photon-100), a TXS rotating anode with MoK $\alpha$  radiation ( $\lambda = 0.71073 \text{ \AA}$ ), and a Helios optic using the APEX3 software package.<sup>12</sup> Measurements were performed on single crystals coated with perfluorinated ether. The crystals were fixed on top of a kapton micro sampler and frozen under a stream of cold nitrogen. A matrix scan was used to determine the initial lattice parameters. Reflections were corrected for Lorentz and polarisation effects, scan speed, and background using SAINT.<sup>13</sup> Absorption correction, including odd and even ordered spherical harmonics was performed using SADABS.<sup>13</sup> Space group assignments were based upon systematic absences, E statistics, and successful refinement of the structures. The structures were solved using SHELXT with the aid of successive difference Fourier maps, and were refined against all data using SHELXL in conjunction with SHELXLE.<sup>14-16</sup> Hydrogen atoms were calculated in ideal positions as follows: Methyl hydrogen atoms were refined as part of rigid rotating groups, with a C–H distance of  $0.98 \text{ \AA}$  and  $U_{\text{iso(H)}} = 1.5 \cdot U_{\text{eq(C)}}$ . Non-methyl hydrogen atoms were placed in calculated positions and refined using a riding model, with methylene and aromatic C–H distances of  $0.99 \text{ \AA}$  and  $0.95 \text{ \AA}$ , respectively, and other C–H distances of  $1.00 \text{ \AA}$ , all with  $U_{\text{iso(H)}} = 1.2 \cdot U_{\text{eq(C)}}$ . Non-hydrogen atoms were refined with anisotropic displacement parameters. Full-matrix least-squares refinements were carried out by minimizing  $\sum w(F_o^2 - F_c^2)^2$  with the SHELXL weighting scheme.<sup>14</sup> Neutral atom scattering factors for all atoms and anomalous dispersion corrections for the non-hydrogen atoms were taken from *International Tables for Crystallography*.<sup>17</sup> Images of the crystal structures were generated with Mercury.<sup>18</sup> CCDC 2130504 contains the supplementary crystallographic data for this paper. These data are provided free of charge by The Cambridge Crystallographic Data Centre.



**Compound 7 (CCDC 2130504)**

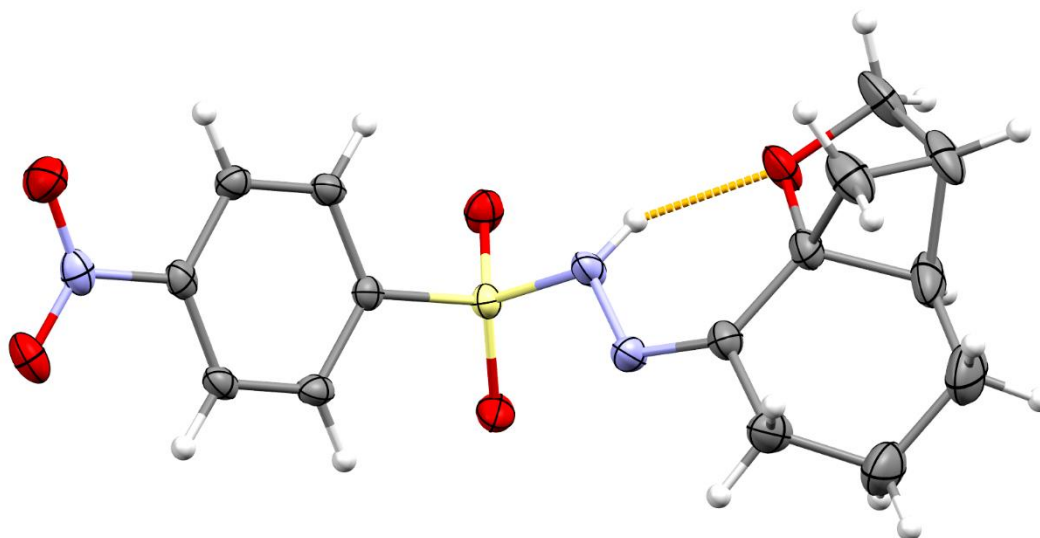

Diffraction operator C. Jandl  
scanspeed 2-20 s per frame  
dx 50 mm  
4392 frames measured in 14 data sets  
phi-scans with  $\Delta\phi = 0.5$   
omega-scans with  $\Delta\omega = 0.5$   
shutterless mode

*Crystal data*

$2(\text{C}_{15}\text{H}_{17}\text{N}_3\text{O}_5\text{S})$

$M_r = 351.38$

Monoclinic,  $P2_1$

Hall symbol:  $P\ 2_1yb$

$a = 6.5937(6)\ \text{\AA}$

$b = 22.424(2)\ \text{\AA}$

$c = 10.7128(11)\ \text{\AA}$

$\beta = 97.951(3)^\circ$

$V = 1568.7(3)\ \text{\AA}^3$

$Z = 4$

$F(000) = 736$

*Data collection*

$D_x = 1.488\ \text{Mg m}^{-3}$

Melting point: ? K

Mo  $K\alpha$  radiation,  $\lambda = 0.71073\ \text{\AA}$

Cell parameters from 9924 reflections

$\theta = 2.6\text{--}27.2^\circ$

$\mu = 0.24\ \text{mm}^{-1}$

$T = 100\ \text{K}$

Fragment, colourless

$0.21 \times 0.07 \times 0.07\ \text{mm}$

Bruker D8 Venture  
 diffractometer 6656 independent reflections  
 Radiation source: TXS rotating anode 6512 reflections with  $I > 2\sigma(I)$   
Helios optic monochromator  $R_{\text{int}} = \underline{0.022}$   
 Detector resolution: 16 pixels mm<sup>-1</sup>  $\theta_{\text{max}} = \underline{26.7}^\circ$ ,  $\theta_{\text{min}} = \underline{2.6}^\circ$   
phi- and omega-rotation scans  $h = \underline{-8}$   $\underline{8}$   
 Absorption correction: multi-scan  
SADABS 2016/2, Bruker  $k = \underline{-28}$   $\underline{28}$   
 $T_{\text{min}} = \underline{0.718}$ ,  $T_{\text{max}} = \underline{0.746}$   $l = \underline{-13}$   $\underline{13}$   
54792 measured reflections

### *Refinement*

Refinement on  $F^2$  Hydrogen site location: mixed  
 Least-squares matrix: full H atoms treated by a mixture of independent and constrained refinement  
 $R[F^2 > 2\sigma(F^2)] = \underline{0.030}$   $W = 1/[\Sigma^2(FO^2) + (0.0417P)^2 + 0.6965P]$   
WHERE  $P = (FO^2 + 2FC^2)/3$   
 $wR(F^2) = \underline{0.080}$   $(\Delta/\sigma)_{\text{max}} = \underline{0.001}$   
 $S = \underline{1.06}$   $\Delta\rho_{\text{max}} = \underline{0.61}$  e  $\text{\AA}^{-3}$   
6656 reflections  $\Delta\rho_{\text{min}} = \underline{-0.28}$  e  $\text{\AA}^{-3}$   
441 parameters Extinction correction: none  
1 restraint Extinction coefficient: -  
0 constraints Absolute structure: Flack, Parsons<sup>19,20</sup>  
 Primary atom site location: iterative Absolute structure parameter: 0.017 (7)  
 Secondary atom site location: difference  
Fourier map

### 13. Determination of Quantum Yield

In a heat-gun dried vial, substrate **4a**, catalyst (9-thioxanthone or **6**) if necessary, and *n*-undecane as internal standard (50 mol%) were dissolved in degassed CH<sub>2</sub>Cl<sub>2</sub> or DCE (10 mM) under positive argon pressure. 2.5 mL of this solution were transferred to a sealable cuvette with a septum screw cap under argon pressure.

This solution was stirred and irradiated with a LED (for emission data, see data sheets) operated at a constant current (700 mA) at room temperature in a previously described setup.<sup>21</sup> The light intensity that was passing the cuvette was continuously measured by a calibrated setup consisting of a cosine-corrector, a 600 μm fiber and an Ocean Optics USB4000 spectrometer. At specific time points, aliquots of 50 μL were taken and diluted with 50 μL CH<sub>2</sub>Cl<sub>2</sub>. The samples were analyzed by calibrated achiral GLC (performed on an Agilent 6890 Series gas chromatograph using a HP-5 column; polydimethyl/diphenyl-siloxane, 95/5 with a flame ionization detector) to obtain the concentration of the individual compounds.

The amount of formed product during an interval of irradiation was calculated by its concentration and the sample volume at that time point. From the measured light intensity, the absorbed energy was calculated by subtraction from the reference intensity of the LED, measured with only solvent in the cuvette and without substrate **4a** or catalyst, and integration over time. Based on the maximum emission wavelength of the LED, the amount of absorbed photons during that interval was calculated.

With the quantum yield as the variable, a best fit of obtained and expected amount of product (amount of absorbed photons × quantum yield) was performed by non-linear regression (least square fit, GRG nonlinear as solving method). Errors are estimated by a Monte Carlo approach at 90% confidence level (assumed standard deviation of concentration error = 5%, 1000 runs).<sup>22</sup> Figure S52 shows the calculated amount of

formed product of the measured aliquots over time for the four conducted experiments as noted in Table S1. The determined quantum yields are also listed. While the best fit of the uncatalyzed photoreaction is of first order, the catalyzed reactions are of zero order in the considered time frames, as expected.

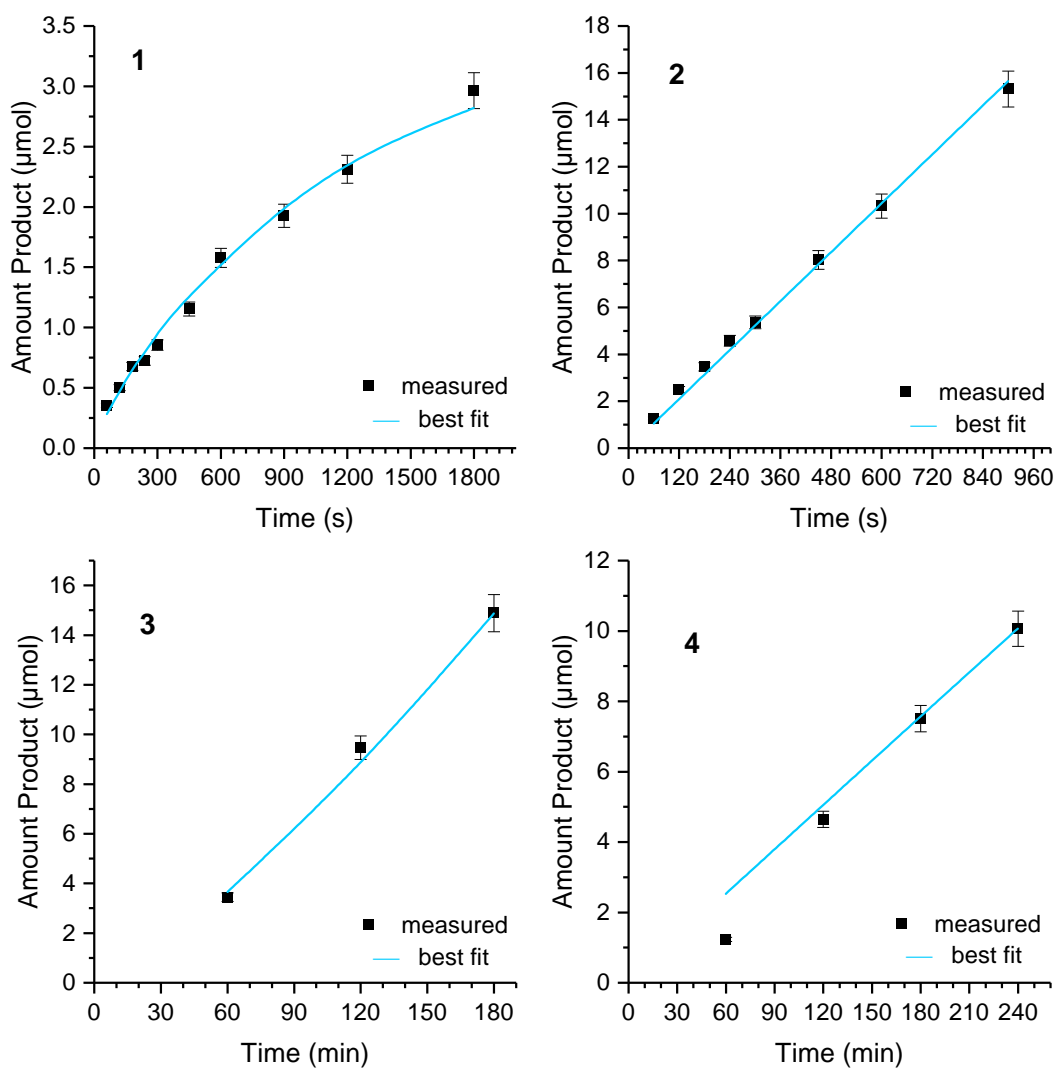

**Figure S52:** Calculated amount of product over time in the four experiments (see Table S1) and best fit for quantum yield determination.

**Table S1.** Conducted quantum yield experiments.

| # | $\lambda_{\max}$ (LED) | Solvent                         | Catalyst          | Quantum Yield |
|---|------------------------|---------------------------------|-------------------|---------------|
| 1 | 368 nm                 | CH <sub>2</sub> Cl <sub>2</sub> | none              | 0.321 ± 0.034 |
| 2 | 382 nm                 | CH <sub>2</sub> Cl <sub>2</sub> | TXT (10 mol%)     | 0.316 ± 0.011 |
| 3 | 424 nm                 | DCE                             | TXT (2 mol%)      | 0.299 ± 0.055 |
| 4 | 424 nm                 | DCE                             | <b>6</b> (2 mol%) | 0.003 ± 0.001 |

## 14. References

- 1) (a) D. Rackl, V. Kais, P. Kreitmeier and O. Reiser, *Beilstein J. Org. Chem.*, 2014, **10**, 2157-2165; (b) D. Lenhart, A. Bauer, A. Pöthig and T. Bach, *Chem. Eur. J.*, 2016, **22**, 6519-6523.
- 2) R. Graßl, C. Jandl and T. Bach, *J. Org. Chem.*, 2020, **85**, 11426-11439.
- 3) J. Ma, X. Zhang, X. Huang, S. Luo and E. Meggers, *Nat. Protoc.*, 2018, **13**, 605-632.
- 4) K. Hirano, A. T. Biju, I. Piel and Frank Glorius, *J. Am. Chem. Soc.*, 2009, **131**, 14190-14191.
- 5) K. J. Emery, T. Tuttle and J. A. Murphy, *Org. Biomol. Chem.*, 2017, **15**, 8810-8819.
- 6) X. Jin, W. Xu, J. Yang, J. Lu, Y. Fu, L. Xie, Q. Zhu and W. Dong, *Tetrahedron Lett.*, 2015, **56**, 6287-6289.
- 7) L. Lempenauer, E. Duñach and G. Lemièrre, *Org. Lett.*, 2016, **18**, 1326-1329.
- 8) A. A. Frimer, V. Marks, P. Gilinsky-Sharon, L. Aljadef and H. E. Gottlieb, *J. Org. Chem.*, 1995, **60**, 4510-4520.
- 9) M. Rodríguez, G. Font, J. Nadal-Moradell, A. Hernán-Gómez, M. Costas, *Adv. Synth. & Catal.*, 2020, **362**, 5116-5123.
- 10) C. Zhao, D. Guo, K. Munkerup, K.-W. Huang, F. Li and J. Wang, *Nat. Commun.*, 2018, **9**, 611.
- 11) K. Winska, A. Grudniewska, A. Chojnacka, A. Białonska and C. Wawrzenczyk, *Tetrahedron Asymmetry*, 2010, **21**, 670-678.
- 12) *APEX suite of crystallographic software*, APEX 3, Version 2019-1.0, Bruker AXS Inc., Madison, Wisconsin, USA, 2019.
- 13) *SAINTE*, Version 8.40A and *SADABS*, Version 2016/2, Bruker AXS Inc., Madison, Wisconsin, USA, 2016/2019.
- 14) G. M. Sheldrick, *Acta Crystallogr. Sect. A*, 2015, **71**, 3-8.
- 15) G. M. Sheldrick, *Acta Crystallogr. Sect. C*, 2015, **71**, 3-8.
- 16) C. B. Hübschle, G. M. Sheldrick and B. Dittrich, *J. Appl. Cryst.*, 2011, **44**, 1281-1284.
- 17) *International Tables for Crystallography, Vol. C* (Ed.: A. J. Wilson), Kluwer Academic Publishers, Dordrecht, The Netherlands, 1992, Tables 6.1.1.4 (pp. 500-502), 4.2.6.8 (pp. 219-222), and 4.2.4.2 (pp. 193-199).

- 18) C. F. Macrae, I. J. Bruno, J. A. Chisholm, P. R. Edgington, P. McCabe, E. Pidcock, L. Rodriguez-Monge, R. Taylor, J. van de Streek and P. A. Wood, *J. Appl. Cryst.*, 2008, **41**, 466-470.
- 19) H. D. Flack, *Acta Crystallogr. Sect A*, 1983, **39**, 876-881.
- 20) S. Parsons, H. D. Flack and T. Wagner, *Acta Crystallogr. Sect B*, 2013, **69**, 249-259.
- 21) F. M. Hörmann, C. Kerzig, T. S. Chung, A. Bauer, O. S. Wenger and T. Bach, *Angew. Chem. Int. Ed.*, 2020, **59**, 9659-9668.
- 22) This method was also applied in: A. Hölzl-Hobmeier, A. Bauer, A. Vieira Silva, S. M. Huber, C. Bannwarth and T. Bach, *Nature*, 2018, **564**, 240-243.
